# Supplementary material for: Alterations in Skeletal Muscle Insulin Signaling DNA Methylation: A Pilot Randomized Controlled Trial of Olanzapine in Healthy Volunteers
Source: MDPI journal article supplement (doi:10.3390/biomedicines12051057), 2024-05-10

**Figure S1 – Pre-Normalization Probe Type Density Plot**

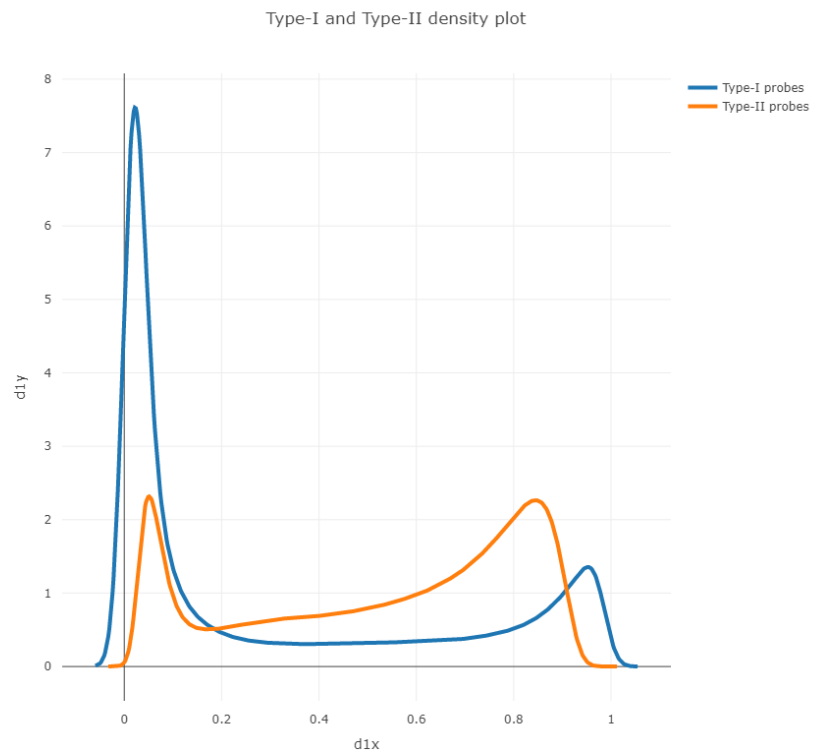

**Figure S2 – Post-Normalization Probe Type Density Plot**

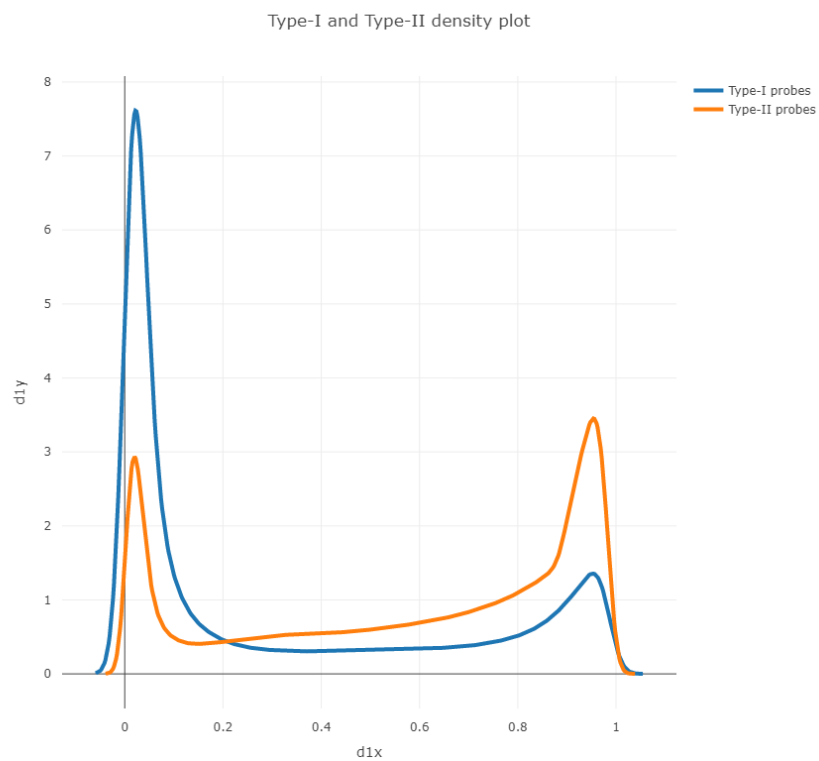

**Figure S3 – Pre-Batch Correction Singular Value Decomposition Plot**

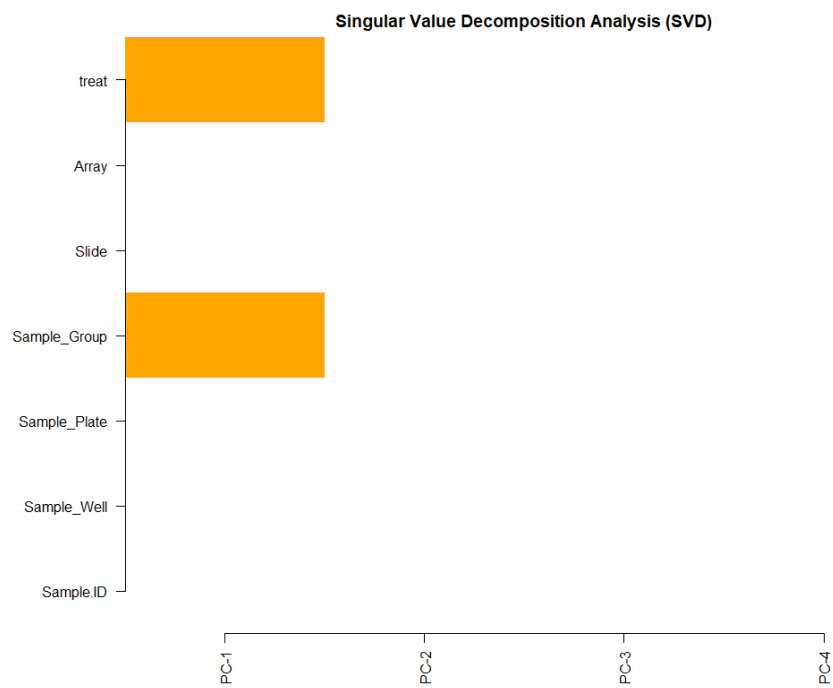

**Figure S4 – Post-Batch Correction Singular Value Decomposition Plot**

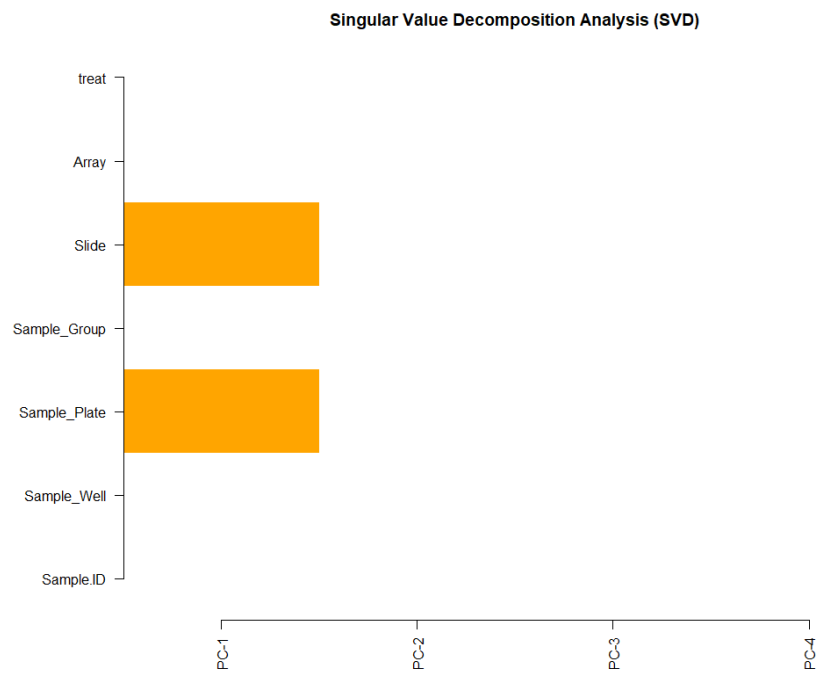

**Figure S5** – CG Type Proportions for 97 Significant Sites

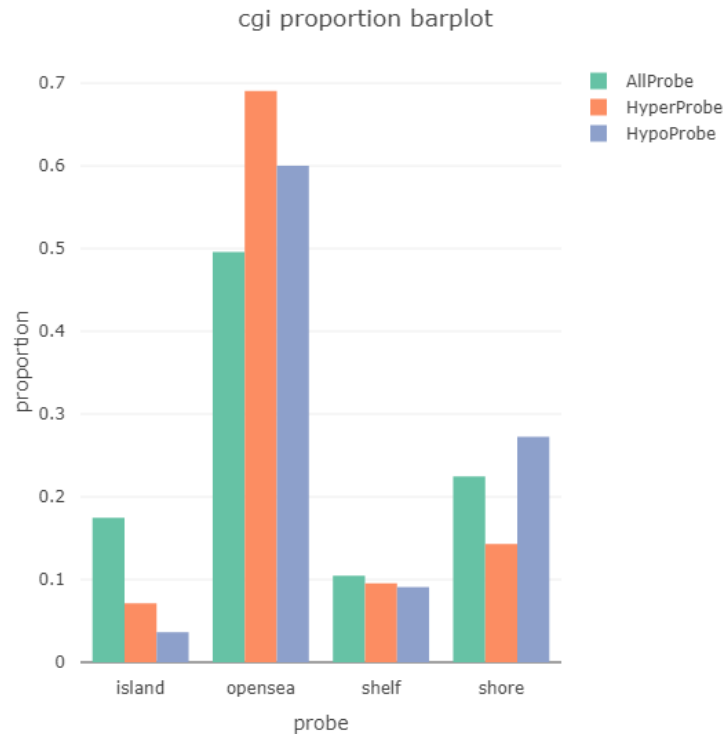

**Figure S6** – Gene Feature Proportions for 97 Significant Sites

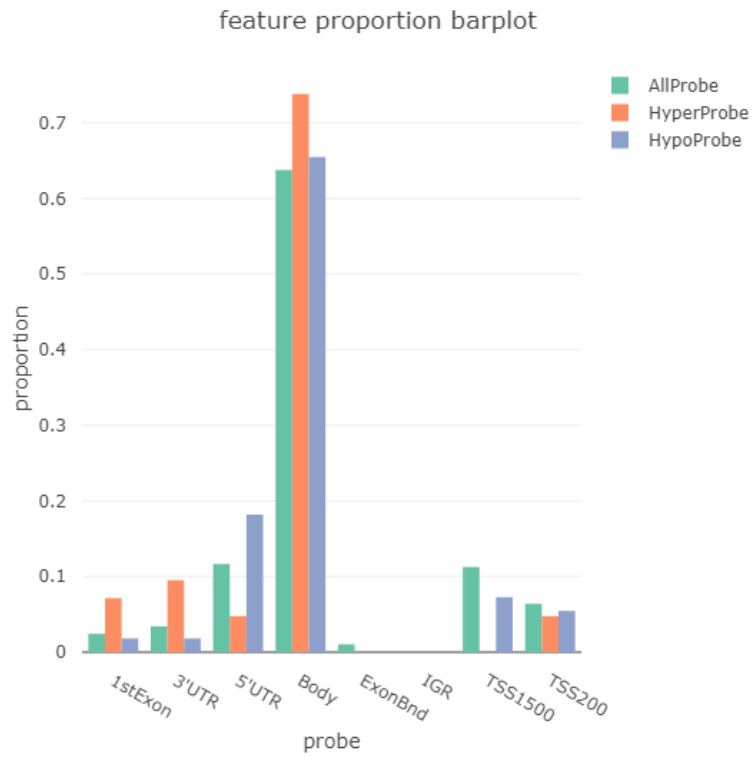

**Figure S7 – Gene Methylation Figure for *PRKAR1B***

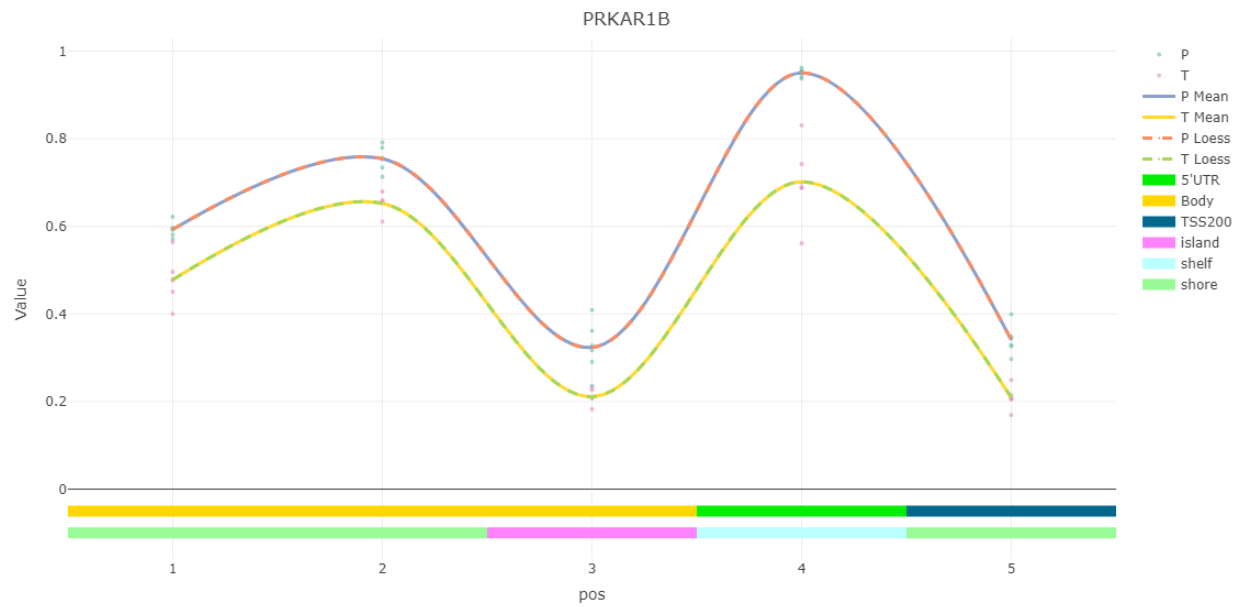

**Figure S8 - Gene Methylation Figure for *SREBF1***

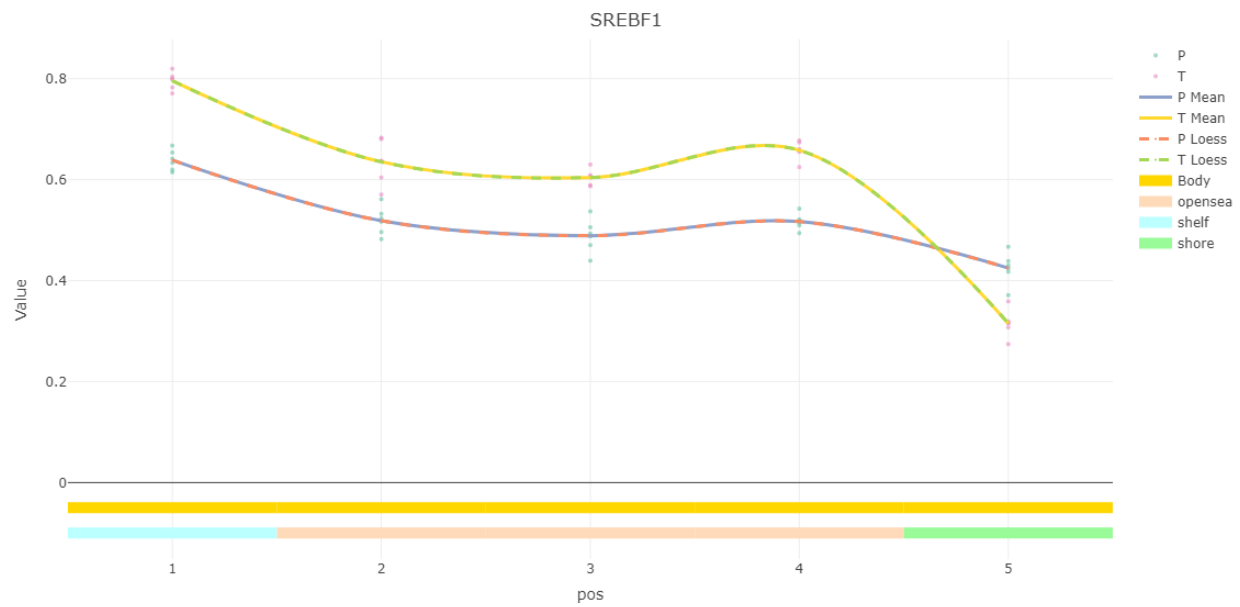

Figure S9 – Gene Methylation Figure for *IRS1*

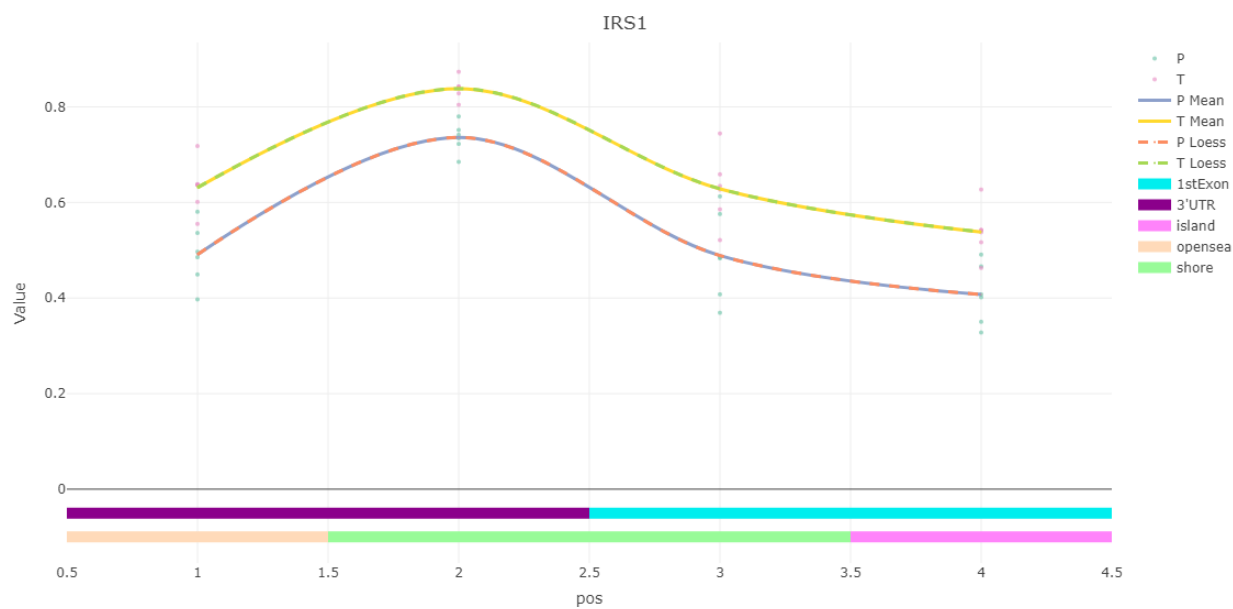

Supplement: s1 [file s1]
