# Supplementary material for: Alterations in Skeletal Muscle Insulin Signaling DNA Methylation: A Pilot Randomized Controlled Trial of Olanzapine in Healthy Volunteers
Source: Biomedicines. 2024 May 10;12(5):1057. doi: 10.3390/biomedicines12051057 (PMC11117943; doi:10.3390/biomedicines12051057)
Supplement: Supplementary file 1 [file biomedicines-12-01057-s001.zip › IVGTT_paper_supp_tables_R1.xlsx]

## Sheet: S1. Full Methylation Results
	T_to_P.raw.P.Val	T_to_P.adj.P.Val	T_to_P.deltaBeta	absolute delta beta	T_to_P.gene	T_to_P.feature	T_to_P.cgi
cg24160354	0.00405054	0.0158297	-0.52132	0.52132	PPARGC1A	Body	opensea
cg24368702	1.35785e-05	0.000240165	0.248735	0.248735	PRKAR1B	5'UTR	shelf
cg09803959	4.50163e-06	0.000108569	0.213969	0.213969	RPTOR	Body	shore
cg23177739	1.67869e-06	5.41957e-05	-0.20196	0.20196	HK1	Body	opensea
cg25055867	0.00167619	0.00812605	0.194838	0.194838	RAF1	Body	opensea
cg19586199	0.00052585	0.00343242	-0.193545	0.193545	PRKACA	TSS200	shelf
cg15276228	0.00346071	0.0142242	-0.184605	0.184605	CBLB	Body	opensea
cg17156349	0.000331036	0.00241656	0.170811	0.170811	PRKCZ	Body	opensea
cg21764708	1.85689e-08	2.50433e-06	0.170433	0.170433	PRKAG2	5'UTR	opensea
cg25263021	4.49896e-06	0.000108569	0.165139	0.165139	MKNK1	Body	opensea
cg10155158	2.05318e-05	0.000315339	0.164084	0.164084	BRAF	Body	opensea
cg16424182	0.000164735	0.0014475	0.163615	0.163615	TSC2	Body	shore
cg21008208	3.48917e-07	1.80482e-05	0.161663	0.161663	PRKAG2	Body	opensea
cg07943849	4.41436e-06	0.000107573	0.161064	0.161064	RHEB	Body	opensea
cg25091228	3.43652e-05	0.0004641	-0.157953	0.157953	PIK3R1	TSS200	shore
cg13891611	6.98626e-09	1.47329e-06	-0.157414	0.157414	SREBF1	Body	shelf
cg07135540	4.22387e-09	1.19713e-06	0.153143	0.153143	EIF4E1B	TSS1500	shore
cg15620905	3.32361e-07	1.76926e-05	0.152579	0.152579	PTPRF	Body	opensea
cg07109046	3.30566e-09	1.19713e-06	0.148962	0.148962	FOXO1	Body	opensea
cg11145302	0.00412538	0.0160536	0.144205	0.144205	INPP5A	Body	shore
cg01004980	2.49936e-05	0.000369044	-0.143458	0.143458	PRKAR2A	Body	shore
cg26899284	0.0999177	0.181828	0.14204	0.14204	PIK3CD-AS1	Body	shore
cg05045427	9.89797e-08	7.75294e-06	-0.141852	0.141852	MAPK10	5'UTR	opensea
cg17029706	9.87e-09	1.86611e-06	-0.141422	0.141422	SREBF1	Body	opensea
cg22612792	0.00114503	0.00601361	-0.140066	0.140066	IRS1	3'UTR	opensea
cg14283647	0.0113241	0.0345329	-0.139681	0.139681	IRS1	1stExon	shore
cg01005180	1.30196e-06	4.57736e-05	0.139067	0.139067	PRKAG2	Body	opensea
cg05249744	0.00367191	0.0147525	0.13893	0.13893	RPTOR	Body	shelf
cg22636722	0.00304552	0.012876	0.1374	0.1374	RPTOR	Body	shore
cg24667756	2.51178e-05	0.000369044	0.137095	0.137095	RPTOR	Body	shelf
cg21140290	1.06231e-05	0.000200849	0.136883	0.136883	PRKCI	Body	opensea
cg27552560	7.23058e-10	5.0148e-07	0.136585	0.136585	PTPRF	5'UTR	opensea
cg02759332	5.02893e-05	0.000592981	0.136354	0.136354	MKNK1	5'UTR	opensea
cg24367474	1.37428e-05	0.000241512	0.1361	0.1361	RPTOR	TSS1500	shore
cg16390522	0.000243615	0.00192699	0.135094	0.135094	PPP1R3E	3'UTR	opensea
cg11476241	0.00025988	0.0020183	0.134989	0.134989	RPTOR	Body	shelf
cg25012951	0.000328828	0.00240716	0.134485	0.134485	RHEB	Body	opensea
cg05334363	0.0170055	0.0472347	-0.134279	0.134279	CRK	3'UTR	opensea
cg03689586	6.37902e-06	0.00014098	0.131851	0.131851	MAPK8	5'UTR	opensea
cg06461306	5.72808e-06	0.00013032	0.131698	0.131698	PRKAR1B	TSS200	shore
cg20902758	0.000212982	0.00174036	0.131651	0.131651	FLOT1	Body	opensea
cg17116028	0.00828527	0.0272842	-0.131276	0.131276	PHKG1	Body	opensea
cg00727310	0.00169066	0.00816231	-0.130737	0.130737	IRS1	1stExon	island
cg19297537	0.000121397	0.00113976	0.129205	0.129205	HK1	Body	opensea
cg01060950	6.05977e-05	0.000675319	0.129158	0.129158	PTPN1	5'UTR	opensea
cg24401566	4.82471e-09	1.19713e-06	-0.12692	0.12692	SORBS1	Body	opensea
cg02095219	0.00597444	0.0213545	0.126242	0.126242	RPS6KB1	5'UTR	opensea
cg02271687	0.0114886	0.03486	-0.124487	0.124487	PIK3R1	Body	shore
cg16438182	4.84063e-05	0.000583453	0.124313	0.124313	RPTOR	Body	shore
cg03599988	1.38761e-05	0.000243075	0.122867	0.122867	PRKCZ	5'UTR	shore
cg11894504	0.0195957	0.0525139	0.122071	0.122071	MKNK2	Body	island
cg25763538	0.00582796	0.021009	-0.12098	0.12098	KRAS	Body	opensea
cg13429419	0.00039546	0.00275516	-0.120678	0.120678	PTPN1	5'UTR	opensea
cg02465282	0.0401393	0.091321	-0.118969	0.118969	INPP5A	Body	opensea
cg02234216	4.47593e-05	0.000558963	-0.117991	0.117991	ACACA	Body	opensea
cg00644322	0.000675669	0.00411176	-0.117759	0.117759	SORBS1	Body	opensea
cg17116476	0.00674366	0.0234319	-0.117095	0.117095	PHKB	Body	opensea
cg27577993	0.00104067	0.00561059	0.116998	0.116998	PRKAG2	Body	opensea
cg06619462	0.000103489	0.00100832	-0.116688	0.116688	SREBF1	Body	opensea
cg23915437	1.91833e-08	2.50433e-06	0.116102	0.116102	AKT2	Body	opensea
cg14059145	0.000331434	0.00241656	0.115811	0.115811	PRKAG2	Body	opensea
cg19891156	4.73005e-06	0.000111589	-0.115263	0.115263	SREBF1	Body	opensea
cg19125584	0.000253153	0.00198008	0.11495	0.11495	PRKAR1B	Body	shore
cg14871932	8.65141e-06	0.000176999	-0.114577	0.114577	GCK	Body	island
cg07896009	4.90513e-08	4.71839e-06	-0.114514	0.114514	PRKCZ	Body	opensea
cg26704517	1.03772e-07	8.01383e-06	0.114162	0.114162	MAPK10	TSS1500	opensea
cg23570396	0.000321218	0.00237363	-0.113875	0.113875	GRB2	Body	opensea
cg06173958	1.34564e-05	0.000238776	0.113774	0.113774	PYGL	TSS1500	shore
cg17744110	2.98016e-07	1.66737e-05	0.113683	0.113683	CALM3	Body	shelf
cg00967316	0.0101989	0.0319314	-0.112686	0.112686	PPP1R3A	1stExon	opensea
cg19877741	0.000613752	0.00383024	0.112335	0.112335	PRKAR1B	Body	island
cg06288918	0.00024295	0.00192499	-0.111619	0.111619	INPP5A	Body	opensea
cg07324110	2.60591e-05	0.000376794	0.109615	0.109615	SREBF1	Body	shore
cg15442244	2.1417e-06	6.34754e-05	0.108044	0.108044	MAPK8	5'UTR	opensea
cg12060684	0.00751917	0.0252775	-0.107898	0.107898	MAPK10	Body	opensea
cg19997898	0.0234589	0.0602177	0.107815	0.107815	PYGB	Body	opensea
cg24207068	5.75255e-07	2.51071e-05	0.10728	0.10728	RPTOR	Body	shore
cg08679405	0.000467059	0.00313834	-0.107264	0.107264	RHEB	Body	opensea
cg16971827	0.00350039	0.0143122	-0.107192	0.107192	CBL	3'UTR	shelf
cg18888671	0.0053629	0.0197215	-0.10699	0.10699	PRKCZ	Body	opensea
cg06854565	0.000939884	0.00525855	-0.106069	0.106069	PRKCZ	Body	opensea
cg09985163	0.00581766	0.0209857	-0.10568	0.10568	INSR	Body	opensea
cg15527168	0.000673535	0.00410373	-0.105646	0.105646	CALML6	Body	shelf
cg09319838	0.000104982	0.00102059	0.105607	0.105607	MAPK8	5'UTR	opensea
cg14655038	0.000375167	0.00264741	-0.105037	0.105037	PYGM	Body	opensea
cg16200808	0.00120434	0.00628442	0.105015	0.105015	GCK	Body	opensea
cg14112338	2.55976e-05	0.000373276	0.103885	0.103885	PDE3B	Body	opensea
cg10364945	0.0231254	0.0595011	0.103512	0.103512	EIF4E2	3'UTR	opensea
cg23923820	1.57661e-08	2.43337e-06	-0.103354	0.103354	PKLR	Body	shore
cg01108370	8.30289e-05	0.000853857	-0.103026	0.103026	PRKAG2	Body	opensea
cg09213979	0.000883243	0.00499775	-0.102808	0.102808	RAPGEF1	Body	opensea
cg11996390	2.61137e-05	0.000376794	-0.102304	0.102304	IRS1	3'UTR	shore
cg15864985	6.26992e-05	0.00069032	0.102285	0.102285	HK1	Body	opensea
cg14120583	0.00135794	0.00690044	-0.102236	0.102236	SHC2	Body	island
cg12125484	1.56232e-05	0.000264561	0.102073	0.102073	PRKAR1B	Body	shore
cg02176069	2.77369e-07	1.58418e-05	0.101866	0.101866	PYGM	1stExon	opensea
cg12225220	1.426e-05	0.000248214	0.101857	0.101857	MAPK10	TSS200	opensea
cg15851137	0.000684704	0.00414832	-0.101486	0.101486	PPP1CC	Body	opensea
cg03502601	0.00160636	0.00789924	0.101064	0.101064	RPTOR	Body	shore
cg26480745	1.0154e-05	0.000199311	0.100727	0.100727	SLC2A4	TSS200	island
cg23039425	1.48396e-05	0.000255064	0.10044	0.10044	EIF4E	Body	opensea
cg17575314	0.000167752	0.00146696	0.100317	0.100317	HK1	Body	opensea
cg15286651	4.53236e-08	4.60202e-06	0.0999075	0.0999075	PPP1CC	Body	opensea
cg09101894	1.76943e-05	0.000284777	-0.0998801	0.0998801	PIK3R1	Body	shore
cg27407935	7.88794e-05	0.000820675	-0.0996815	0.0996815	SREBF1	Body	shelf
cg02319485	1.83351e-07	1.1968e-05	-0.0996485	0.0996485	PCK1	5'UTR	opensea
cg27376589	6.11095e-06	0.000138033	0.0993524	0.0993524	PRKAG2	Body	opensea
cg16581738	0.000754679	0.00447825	0.0992438	0.0992438	PRKAR1B	Body	opensea
cg22513396	1.32334e-08	2.26746e-06	-0.0990616	0.0990616	PRKAG2	Body	opensea
cg16373141	0.000225386	0.00181562	0.0989035	0.0989035	PRKAG2	5'UTR	opensea
cg18087520	0.000192933	0.00161258	-0.0988246	0.0988246	CALM1	TSS1500	shore
cg18828468	2.58621e-06	7.16172e-05	0.0986768	0.0986768	PTPRF	Body	opensea
cg07744449	0.0452441	0.0993485	-0.0981944	0.0981944	PPARGC1A	Body	opensea
cg09433064	0.001056	0.0056654	0.0981861	0.0981861	PRKCZ	Body	island
cg27093958	0.0535101	0.112628	-0.0978087	0.0978087	PRKAG2	Body	opensea
cg22580932	4.92905e-10	5.0148e-07	0.0971197	0.0971197	GSK3B	Body	opensea
cg00597982	0.00183156	0.00870229	-0.0967817	0.0967817	MAP2K1	Body	opensea
cg05335604	0.00161234	0.00791446	0.0967728	0.0967728	RPTOR	Body	opensea
cg09125924	0.0325474	0.0774891	-0.0962647	0.0962647	PRKAG2	Body	opensea
cg07859818	7.30093e-05	0.000777301	0.0960241	0.0960241	RAPGEF1	Body	opensea
cg15230985	0.00493062	0.0185042	0.0956152	0.0956152	RPTOR	Body	opensea
cg04744514	7.74921e-05	0.000810327	0.0956066	0.0956066	INPP5A	Body	shore
cg02047211	0.0775176	0.1495	0.09541	0.09541	RPTOR	Body	shelf
cg15912732	1.96246e-06	6.00731e-05	0.0953215	0.0953215	AKT1	Body	shelf
cg07856428	0.00690176	0.0238302	0.0944073	0.0944073	RPTOR	Body	shelf
cg10278454	6.70127e-07	2.8449e-05	-0.094328	0.094328	PCK1	TSS1500	opensea
cg02663137	0.000158982	0.00141739	-0.0937857	0.0937857	TRIP10	Body	shore
cg15826479	0.00829121	0.0272864	-0.0936911	0.0936911	RPTOR	Body	opensea
cg25782256	0.00447089	0.0170637	0.0936594	0.0936594	INPP5A	Body	shore
cg14444710	2.71628e-08	3.03946e-06	0.0936303	0.0936303	PDPK1	TSS1500	shore
cg10219789	2.65816e-05	0.000381537	0.0934015	0.0934015	PRKCZ	Body	opensea
cg18748898	5.52785e-05	0.000638089	-0.0933404	0.0933404	SREBF1	ExonBnd	opensea
cg03883275	5.72876e-05	0.000649909	0.0931847	0.0931847	MAPK8	TSS1500	opensea
cg09306653	0.00783515	0.0261043	-0.0931311	0.0931311	FOXO1	Body	opensea
cg04555966	8.28441e-05	0.000853824	-0.0928027	0.0928027	GCK	Body	island
cg04002063	0.0132054	0.0386368	0.0918271	0.0918271	CBLB	Body	opensea
cg09977718	0.000745044	0.0044403	0.0916253	0.0916253	RPTOR	Body	shelf
cg20242624	0.00423444	0.0163503	0.0908739	0.0908739	IKBKB	Body	opensea
cg05894391	0.0074037	0.0249689	-0.0908051	0.0908051	PRKAA2	TSS1500	shore
cg18919462	0.0035664	0.0144825	0.0907599	0.0907599	SOS1	Body	opensea
cg18418335	0.0426983	0.0954401	0.0907431	0.0907431	MKNK2	Body	island
cg04129548	0.0213562	0.0560001	-0.0905083	0.0905083	IRS1	1stExon	island
cg04515572	1.97213e-06	6.00731e-05	0.0903835	0.0903835	TSC2	Body	shelf
cg18305394	2.49268e-08	2.90794e-06	-0.0901772	0.0901772	PCK1	TSS1500	opensea
cg10500719	3.65473e-05	0.000486381	-0.090108	0.090108	RPTOR	Body	opensea
cg12832482	1.2831e-06	4.56835e-05	0.0900559	0.0900559	RAPGEF1	Body	opensea
cg20210689	1.73056e-05	0.00028073	0.0896199	0.0896199	INPP5A	Body	shore
cg12108143	1.52778e-06	5.13914e-05	0.0892892	0.0892892	PRKAR1B	Body	shore
cg19895894	0.00723188	0.0245526	0.0890072	0.0890072	INPP5A	Body	island
cg11634930	0.000496741	0.00328544	-0.0885637	0.0885637	MKNK2	Body	island
cg15939920	1.58559e-08	2.43337e-06	0.0884005	0.0884005	ACACA	Body	opensea
cg03650425	4.8677e-05	0.000583453	-0.0879961	0.0879961	PCK1	Body	opensea
cg21276535	0.00215914	0.00981639	-0.0878113	0.0878113	MAP2K1	Body	opensea
cg13752461	9.83426e-05	0.000967464	0.0877226	0.0877226	ACACB	Body	opensea
cg22348534	0.00465047	0.0176095	0.0875744	0.0875744	EIF4EBP1	TSS1500	shore
cg06522179	5.54923e-06	0.000127307	-0.086693	0.086693	PDPK1	Body	opensea
cg01736962	8.04521e-07	3.27425e-05	0.0866864	0.0866864	ACACB	Body	opensea
cg00704970	0.000882557	0.00499775	0.0866825	0.0866825	RPTOR	Body	shore
cg13655303	5.85587e-07	2.52817e-05	-0.0866102	0.0866102	PCK1	TSS1500	opensea
cg21971818	1.69215e-06	5.42578e-05	-0.0862918	0.0862918	RAF1	Body	opensea
cg03996021	6.49691e-06	0.00014249	0.0862907	0.0862907	EIF4E1B	5'UTR	opensea
cg19652829	0.000207846	0.00170857	0.0860534	0.0860534	PIK3R1	Body	opensea
cg09418268	0.00178115	0.00851443	0.0857602	0.0857602	MTOR	Body	opensea
cg27461259	0.000391426	0.00273749	-0.0853517	0.0853517	PPARGC1A	TSS1500	opensea
cg15288420	2.20019e-05	0.000334172	0.0852701	0.0852701	INPP5A	Body	opensea
cg10775173	0.000175149	0.00151953	0.0846756	0.0846756	PRKAG2	Body	opensea
cg11344729	0.00721568	0.0245279	0.0845218	0.0845218	PRKAG2	Body	opensea
cg24101643	0.000190109	0.00159522	-0.0843537	0.0843537	RAF1	5'UTR	opensea
cg07557404	0.00876823	0.0284496	0.0841989	0.0841989	INPP5A	Body	opensea
cg20456620	0.0648487	0.130483	-0.0840527	0.0840527	INPP5A	Body	opensea
cg03254354	1.2022e-05	0.000220458	-0.0837158	0.0837158	PHKB	Body	opensea
cg13863186	0.007995	0.0264554	0.083591	0.083591	IKBKB	Body	opensea
cg04895562	0.00532265	0.0196394	-0.0829665	0.0829665	RAPGEF1	Body	opensea
cg16627809	0.000820743	0.00474197	-0.0828089	0.0828089	PRKAR2B	Body	opensea
cg12889538	0.000808581	0.00469794	-0.082719	0.082719	PRKAG2	Body	opensea
cg05239544	4.74196e-06	0.000111589	-0.0825332	0.0825332	PRKCZ	TSS1500	shore
cg26354721	4.79697e-09	1.19713e-06	0.0822317	0.0822317	SOS1	3'UTR	opensea
cg24117442	0.0293512	0.0715423	-0.0818967	0.0818967	SOCS2	TSS200	shore
cg07115878	0.02909	0.0711738	0.0817483	0.0817483	AKT3	Body	opensea
cg01673421	0.000984735	0.00540471	0.081636	0.081636	AKT3	Body	opensea
cg09838169	0.0432875	0.0964426	-0.0812518	0.0812518	INPP5A	Body	opensea
cg20237106	0.000153582	0.00138274	-0.0809992	0.0809992	PRKAG2	Body	opensea
cg25268100	0.0131733	0.0385841	0.0808335	0.0808335	INPP5A	Body	shelf
cg12079975	0.010641	0.0329231	0.0808326	0.0808326	PRKAG2	Body	opensea
cg01937019	4.72993e-05	0.000577153	-0.080556	0.080556	TRIP10	3'UTR	shore
cg13853823	0.00603607	0.0215176	0.0805262	0.0805262	CBL	Body	opensea
cg27613592	0.00298305	0.0126693	0.0804419	0.0804419	PTPRF	5'UTR	opensea
cg08926035	1.95546e-05	0.000304596	-0.0804396	0.0804396	PYGM	Body	opensea
cg16832975	2.45306e-06	6.89489e-05	0.0800326	0.0800326	INPP5A	Body	island
cg01372618	1.18721e-05	0.000218439	-0.0799863	0.0799863	PRKAG2	Body	opensea
cg21777155	0.00549488	0.0200723	0.0799107	0.0799107	INSR	Body	opensea
cg16477417	4.00912e-10	5.0148e-07	-0.0798487	0.0798487	GRB2	Body	opensea
cg09413029	0.000999331	0.0054684	-0.0798122	0.0798122	SORBS1	Body	opensea
cg08695652	1.18773e-06	4.31282e-05	0.0794688	0.0794688	PIK3R1	5'UTR	opensea
cg01903245	2.9382e-08	3.15885e-06	-0.079448	0.079448	MAPK10	5'UTR	opensea
cg02864619	0.000503722	0.0033196	0.0794241	0.0794241	RPTOR	Body	shore
cg15453708	0.00305088	0.0128805	0.0793525	0.0793525	PRKAG2	5'UTR	opensea
cg06683083	0.0168793	0.0470271	-0.0793261	0.0793261	PDPK1	Body	shelf
cg17220152	1.05285e-09	5.77275e-07	0.0786704	0.0786704	IKBKB	Body	opensea
cg22846391	9.3921e-05	0.000934608	0.0786648	0.0786648	HK3	Body	opensea
cg08272205	0.000249573	0.00196271	-0.078421	0.078421	SORBS1	Body	opensea
cg02170490	1.22882e-05	0.000224588	-0.0780659	0.0780659	PDPK1	Body	opensea
cg10064484	0.0163198	0.0456771	0.0780367	0.0780367	PTPRF	Body	shelf
cg19742173	0.00984017	0.0310972	0.0780283	0.0780283	MAP2K1	Body	opensea
cg12497289	7.87827e-07	3.24786e-05	-0.0778036	0.0778036	IKBKB	Body	opensea
cg14461076	0.00611705	0.0216946	-0.0777036	0.0777036	CBLB	Body	opensea
cg23629792	1.51938e-05	0.000260336	-0.0776561	0.0776561	PRKCZ	Body	shelf
cg02829778	0.000276942	0.00211486	0.0774908	0.0774908	HK2	Body	opensea
cg17771270	0.00470081	0.0177633	0.0774764	0.0774764	RPTOR	Body	opensea
cg23820589	0.00177509	0.00849288	0.0774149	0.0774149	PRKCZ	Body	opensea
cg04781532	1.36856e-05	0.00024128	-0.0774028	0.0774028	PRKAG2	Body	opensea
cg10717082	0.00444909	0.0170114	0.0770423	0.0770423	PPP1CB	Body	shelf
cg08433465	0.0248035	0.0629336	0.0768754	0.0768754	MTOR	Body	opensea
cg24883607	2.81056e-07	1.58869e-05	0.0766306	0.0766306	PRKAR1B	Body	shore
cg10073280	1.72767e-05	0.00028073	-0.0763866	0.0763866	PPP1R3A	TSS1500	opensea
cg27129144	0.00387494	0.0153071	0.0759057	0.0759057	RPTOR	Body	shore
cg06534376	8.23152e-08	6.73633e-06	0.0755902	0.0755902	FLOT1	Body	shore
cg02687548	0.0100871	0.0317313	0.0755876	0.0755876	PTPRF	5'UTR	opensea
cg25076452	0.0188281	0.0509045	0.0751767	0.0751767	EIF4E2	Body	opensea
cg16424396	0.007417	0.02498	0.075089	0.075089	HKDC1	Body	opensea
cg17375396	0.00223504	0.0101195	0.0749237	0.0749237	RPS6KB2	3'UTR	shore
cg16799206	0.0141473	0.0408047	-0.0747445	0.0747445	PTPN1	5'UTR	opensea
cg09593141	0.00267065	0.0116435	-0.0745556	0.0745556	SORBS1	5'UTR	opensea
cg19621460	5.71067e-08	5.2186e-06	0.0742668	0.0742668	PRKACA	TSS1500	shelf
cg25397191	0.0115632	0.0350475	-0.0742025	0.0742025	PRKACA	TSS200	shelf
cg04881751	1.12973e-07	8.43272e-06	0.0741481	0.0741481	INPP5A	Body	shore
cg02286008	9.44269e-06	0.000188957	0.0741472	0.0741472	MAPK3	Body	shore
cg12608975	0.00054655	0.00350906	0.0739887	0.0739887	INPP5A	Body	opensea
cg07851807	4.05267e-05	0.000523568	0.0739627	0.0739627	PTPRF	Body	opensea
cg05167561	0.000540023	0.00348757	0.0737369	0.0737369	PRKAR1B	Body	island
cg07687131	0.0156209	0.0443092	0.0736121	0.0736121	SOCS2	Body	shore
cg23875758	0.000354939	0.00254525	-0.0735879	0.0735879	SREBF1	3'UTR	shore
cg01432609	9.85786e-06	0.000194726	0.0735345	0.0735345	RPTOR	Body	opensea
cg15434807	0.0243175	0.062102	-0.0734763	0.0734763	RAPGEF1	Body	opensea
cg24244854	2.36174e-06	6.7445e-05	0.0730707	0.0730707	GRB2	Body	opensea
cg19812944	0.000137267	0.00125858	0.0729292	0.0729292	PRKAR1B	TSS1500	shore
cg01464730	0.0111167	0.0339949	-0.072789	0.072789	RPTOR	Body	opensea
cg17185602	0.00019023	0.00159522	-0.0727033	0.0727033	SORBS1	5'UTR	opensea
cg09427718	4.71927e-06	0.000111589	-0.0726982	0.0726982	PPARGC1A	Body	opensea
cg13220129	0.0119732	0.035992	-0.072486	0.072486	MKNK2	Body	island
cg07583563	0.000159281	0.00141776	-0.0722047	0.0722047	CALM1	Body	shelf
cg09591697	0.000773776	0.00455764	-0.0719741	0.0719741	MAPK10	5'UTR	opensea
cg05887821	5.09596e-11	2.79411e-07	-0.0714833	0.0714833	INPP5A	Body	shelf
cg07507705	1.17533e-05	0.00021698	-0.0714711	0.0714711	PIK3CB	Body	opensea
cg02636004	0.00984989	0.03111	-0.0709431	0.0709431	GSK3B	Body	opensea
cg01586639	0.00141105	0.0071117	-0.07093	0.07093	PYGM	ExonBnd	opensea
cg27556496	0.0441211	0.0976792	0.0709089	0.0709089	RPTOR	Body	opensea
cg23155675	0.165003	0.268248	-0.0708995	0.0708995	SREBF1	Body	opensea
cg14343680	3.52241e-05	0.000473367	-0.0707842	0.0707842	SORBS1	TSS1500	shore
cg16488956	0.000160885	0.00142971	0.0707525	0.0707525	PYGB	Body	opensea
cg12592365	1.1381e-07	8.43272e-06	0.0706944	0.0706944	RPTOR	Body	opensea
cg09906922	9.82849e-06	0.000194726	0.0706133	0.0706133	PRKACA	3'UTR	opensea
cg07240002	0.000982572	0.00540365	0.0704526	0.0704526	RAPGEF1	Body	opensea
cg14626093	0.0466842	0.101818	-0.0703697	0.0703697	PTPN1	5'UTR	opensea
cg20114113	0.0262593	0.0658946	-0.0703637	0.0703637	PPP1R3C	Body	shore
cg02668055	0.00248865	0.0110121	0.0703239	0.0703239	INPP5A	Body	island
cg04694991	0.00679242	0.0235565	-0.0701979	0.0701979	SORBS1	5'UTR	opensea
cg22968728	3.19691e-05	0.000437124	-0.070141	0.070141	MTOR	Body	opensea
cg26588076	0.000773602	0.00455764	0.0701307	0.0701307	SREBF1	TSS1500	shore
cg10623530	0.000428952	0.00295099	0.0700969	0.0700969	PRKAR1B	Body	shelf
cg22652378	0.00319045	0.0133029	0.0700038	0.0700038	RPTOR	Body	opensea
cg26011752	0.0105563	0.0327789	0.0699764	0.0699764	PIK3R3	Body	opensea
cg18400442	5.81498e-05	0.000654693	0.0699712	0.0699712	AKT3	ExonBnd	opensea
cg18976542	0.0271772	0.0677637	-0.0699607	0.0699607	SOS2	Body	opensea
cg02192981	1.9008e-07	1.21309e-05	-0.0698741	0.0698741	PPP1CC	Body	opensea
cg03952500	0.0508759	0.108584	-0.0697906	0.0697906	RAPGEF1	Body	opensea
cg05429445	3.70854e-05	0.000492346	0.0697224	0.0697224	PPP1CA	TSS1500	shore
cg09504313	0.00272303	0.0118307	-0.0696258	0.0696258	CALM2	TSS200	shore
cg14780427	0.0013182	0.00676116	0.0692818	0.0692818	RPTOR	Body	opensea
cg10281768	0.00401503	0.0157358	0.0690953	0.0690953	RPTOR	Body	island
cg17104191	0.00711285	0.0243445	-0.069072	0.069072	SLC2A4	3'UTR	shelf
cg18010368	1.3238e-05	0.00023577	-0.0687103	0.0687103	GYS2	Body	opensea
cg11781622	0.000446715	0.00305404	-0.0687078	0.0687078	PRKCZ	5'UTR	island
cg00239751	2.40209e-06	6.82418e-05	-0.0685755	0.0685755	PRKCZ	Body	shore
cg10127554	0.000537514	0.00347546	0.0685458	0.0685458	PRKAR1B	Body	opensea
cg20250935	0.00801497	0.0265055	0.068545	0.068545	CALM1	TSS1500	shore
cg00328210	0.00420798	0.0162694	-0.0685412	0.0685412	PRKCZ	Body	shore
cg18331732	0.00629322	0.0221781	-0.0684344	0.0684344	TRIP10	Body	shore
cg15934104	9.94892e-05	0.000974105	0.0683917	0.0683917	INPP5A	Body	island
cg01789162	0.000314763	0.00234031	0.0682807	0.0682807	PPP1CA	TSS1500	shore
cg21579472	0.0386814	0.0886294	0.0682187	0.0682187	PIK3R3	Body	shelf
cg26407811	0.000805094	0.0046961	-0.0679666	0.0679666	PRKAG2	Body	opensea
cg07689396	6.78919e-10	5.0148e-07	0.0678695	0.0678695	PRKAR1B	Body	shore
cg04725426	1.52575e-05	0.000260603	0.0678437	0.0678437	TSC2	Body	shelf
cg08526006	0.00201713	0.00934116	0.0678205	0.0678205	CBLB	Body	opensea
cg19995531	0.000783321	0.00459929	-0.0675996	0.0675996	SLC2A4	Body	shore
cg18159943	0.00038647	0.00270974	-0.0675527	0.0675527	EXOC7	TSS1500	shore
cg17133045	0.0312263	0.0748968	0.0675384	0.0675384	AKT3	Body	opensea
cg26059839	1.63163e-06	5.38931e-05	-0.0674753	0.0674753	PRKCZ	Body	shelf
cg05653385	0.00185334	0.00877535	-0.0673088	0.0673088	SHC2	Body	shore
cg13392921	4.69013e-07	2.21689e-05	-0.0672881	0.0672881	SHC4	Body	opensea
cg22547226	0.00506539	0.0188679	-0.0672346	0.0672346	EXOC7	Body	opensea
cg07571734	0.00364242	0.0146525	-0.0671966	0.0671966	PRKAG2	Body	shore
cg16149437	0.00592103	0.0212051	0.067173	0.067173	SOS1	Body	opensea
cg14305701	0.0275537	0.0684425	0.0671728	0.0671728	INPP5A	Body	island
cg01036998	1.65201e-05	0.000272187	-0.0670951	0.0670951	IRS1	3'UTR	opensea
cg08293102	0.00297657	0.0126614	0.0670339	0.0670339	PYGL	Body	opensea
cg08604416	3.86794e-05	0.000506156	-0.0669906	0.0669906	SORBS1	5'UTR	opensea
cg06850491	4.69056e-05	0.000574193	-0.0669616	0.0669616	INSR	Body	opensea
cg25777714	0.00228418	0.0102867	0.0668788	0.0668788	MAP2K2	Body	island
cg15001372	1.17398e-08	2.13695e-06	-0.0668783	0.0668783	GCK	TSS1500	opensea
cg00014104	0.00023934	0.00190741	0.0667586	0.0667586	MAPK1	Body	shore
cg11989056	0.000315427	0.00234031	-0.0666642	0.0666642	PRKCZ	Body	opensea
cg03070187	0.000113871	0.00108584	0.0666607	0.0666607	TRIP10	TSS1500	shore
cg00951204	0.0531075	0.111996	0.0665739	0.0665739	INPP5A	Body	island
cg07693617	0.000536138	0.00347065	-0.0665705	0.0665705	PRKCZ	Body	shore
cg23260717	0.0187015	0.0506371	-0.0665608	0.0665608	MAP2K1	Body	opensea
cg23605961	0.00784128	0.0261043	-0.066559	0.066559	PRKAR1B	5'UTR	shore
cg09462699	0.00143459	0.00719659	-0.0665457	0.0665457	MKNK2	Body	shore
cg02370232	0.00696282	0.0239656	0.0665185	0.0665185	SORBS1	Body	opensea
cg09817217	0.000763093	0.0045184	0.0663448	0.0663448	PRKAG2	Body	opensea
cg02676262	0.0041617	0.016149	0.0663161	0.0663161	INPP5A	Body	shore
cg16041156	9.56353e-08	7.59954e-06	0.0662451	0.0662451	INPP5A	Body	shore
cg07497915	0.000606537	0.00380421	0.066214	0.066214	PPP1R3E	3'UTR	shore
cg25495650	1.08801e-06	4.00374e-05	0.0662063	0.0662063	PRKAR1B	Body	shore
cg10089338	0.0232375	0.0597054	-0.0660223	0.0660223	GSK3B	Body	opensea
cg22243039	4.76765e-06	0.000111702	0.0659459	0.0659459	G6PC3	TSS1500	shore
cg20972917	2.10984e-05	0.00032134	-0.0658205	0.0658205	PRKAG2	Body	opensea
cg23733845	4.27121e-05	0.000545479	0.0656648	0.0656648	SH2B2	Body	island
cg01174708	0.00361327	0.0145692	-0.0656411	0.0656411	ACACA	TSS1500	opensea
cg21652227	0.00902065	0.0290953	0.0656359	0.0656359	PIK3CA	5'UTR	opensea
cg23839081	0.00686471	0.0237471	-0.0656152	0.0656152	PDE3B	Body	opensea
cg06750359	0.0310883	0.0747948	0.065562	0.065562	PTPN1	5'UTR	opensea
cg27177308	0.00491379	0.0184663	0.0654875	0.0654875	PHKB	Body	opensea
cg22762906	0.000194121	0.00161758	-0.0652583	0.0652583	PDPK1	Body	shelf
cg22414151	0.0153706	0.0436667	0.065215	0.065215	CBL	Body	shelf
cg08743032	0.00468986	0.0177341	-0.065198	0.065198	PRKAR2B	Body	shelf
cg07338205	0.000355943	0.00254525	0.0651911	0.0651911	G6PC2	5'UTR	opensea
cg01008154	0.013281	0.0387751	-0.0650887	0.0650887	PIK3R3	Body	opensea
cg05160814	0.000164438	0.00144721	0.0650829	0.0650829	SORBS1	Body	opensea
cg10420423	0.000768557	0.00454584	-0.0648029	0.0648029	PRKAB1	TSS1500	shore
cg22116239	0.00734739	0.0248678	0.0646855	0.0646855	SREBF1	TSS1500	shore
cg23651451	0.0211706	0.0558069	0.0646799	0.0646799	INPP5A	Body	shore
cg09906813	0.0119225	0.0359182	0.0645814	0.0645814	GCK	Body	opensea
cg16690845	0.000401	0.00278534	0.0644521	0.0644521	INPP5A	Body	opensea
cg16333716	0.000978208	0.0053986	-0.064435	0.064435	PIK3R1	Body	shore
cg11927004	0.00263753	0.0115508	-0.0644335	0.0644335	SLC2A4	Body	shore
cg13418804	5.17581e-06	0.000119742	0.0644201	0.0644201	INPP5A	Body	island
cg12114129	0.00719807	0.0245279	0.0640774	0.0640774	GSK3B	Body	opensea
cg10278297	0.032126	0.076619	0.0640713	0.0640713	RPTOR	Body	island
cg17434257	0.000530787	0.00345232	-0.0639048	0.0639048	CALML6	1stExon	shelf
cg03354331	0.00249042	0.0110121	-0.0638979	0.0638979	BRAF	Body	opensea
cg18364113	0.00964551	0.0306232	-0.063887	0.063887	GSK3B	3'UTR	opensea
cg09769647	4.03277e-09	1.19713e-06	-0.0636324	0.0636324	HK2	TSS200	shore
cg02554627	4.27788e-05	0.000545479	0.0636068	0.0636068	PTPN1	Body	opensea
cg20716058	5.29201e-05	0.000618681	-0.0635127	0.0635127	PRKAG2	Body	opensea
cg05568938	0.137665	0.233112	0.0634946	0.0634946	BRAF	Body	opensea
cg16994880	0.030745	0.0741641	0.0634805	0.0634805	PCK1	3'UTR	opensea
cg25966016	0.000223744	0.00180676	-0.0633675	0.0633675	INPP5A	Body	shelf
cg16782871	0.000948573	0.00529636	0.0632001	0.0632001	AKT3	Body	opensea
cg08161449	0.06361	0.128889	-0.0631856	0.0631856	MAP2K1	1stExon	island
cg09891066	2.10842e-05	0.00032134	-0.0631592	0.0631592	PRKCZ	Body	opensea
cg04801767	0.000115349	0.00109611	0.0630803	0.0630803	SH2B2	Body	shore
cg05201209	0.13043	0.223246	-0.0629362	0.0629362	MAPK1	Body	opensea
cg06412669	1.51865e-06	5.13914e-05	-0.0628995	0.0628995	RPTOR	Body	opensea
cg18451382	9.85196e-09	1.86611e-06	0.0627617	0.0627617	PRKCZ	1stExon	island
cg10887670	0.00823612	0.0271549	-0.0627467	0.0627467	PIK3R1	Body	shelf
cg09325360	0.00023757	0.00189882	-0.0624048	0.0624048	TSC2	Body	shore
cg22980971	0.0213124	0.0559386	0.0624047	0.0624047	IKBKB	Body	opensea
cg24605576	0.000265705	0.00204615	-0.0623897	0.0623897	RPTOR	Body	opensea
cg18368845	0.011581	0.0350821	-0.0623101	0.0623101	FOXO1	Body	opensea
cg02733444	0.00784018	0.0261043	0.062169	0.062169	INPP5A	Body	island
cg10035831	0.0393698	0.0898687	0.0620364	0.0620364	RPTOR	Body	shore
cg02344183	1.91733e-05	0.000300702	0.0620269	0.0620269	RPTOR	Body	opensea
cg13154908	0.0334052	0.0791875	-0.0619175	0.0619175	PIK3CA	5'UTR	shelf
cg02085507	0.0200592	0.0535987	0.0618856	0.0618856	TRIP10	TSS1500	shore
cg09702334	0.000187788	0.00159133	0.0617602	0.0617602	PRKAR1B	Body	shore
cg14623296	0.0076911	0.025744	0.0616812	0.0616812	MKNK1-AS1	Body	opensea
cg07375700	2.47292e-07	1.4738e-05	0.0614162	0.0614162	PRKCZ	Body	opensea
cg10741308	0.00481606	0.0181737	0.0613855	0.0613855	SORBS1	Body	opensea
cg05241091	3.67622e-06	9.55295e-05	0.0613314	0.0613314	PRKAR1B	Body	opensea
cg09114339	0.0416898	0.0939134	-0.0612529	0.0612529	PTPN1	Body	opensea
cg16178065	0.00976507	0.0309133	0.0610616	0.0610616	GRB2	Body	opensea
cg00632957	0.0156162	0.0443092	-0.0609342	0.0609342	SHC4	Body	opensea
cg12244055	0.000808796	0.00469794	-0.0609286	0.0609286	SREBF1	3'UTR	shore
cg06282596	2.29195e-06	6.64914e-05	0.0609094	0.0609094	SORBS1	Body	opensea
cg24842354	0.112678	0.199359	0.0608699	0.0608699	PRKCZ	TSS1500	shore
cg15655369	0.00840035	0.0275144	0.0608665	0.0608665	PTPN1	5'UTR	opensea
cg07139788	0.0966057	0.177569	0.0607233	0.0607233	MAPK1	Body	opensea
cg19944119	1.56644e-05	0.000264561	0.0606892	0.0606892	PIK3CA	5'UTR	opensea
cg11796233	0.00102587	0.00555814	-0.060645	0.060645	PRKCZ	5'UTR	shelf
cg01550854	1.07191e-05	0.000201277	-0.0606297	0.0606297	SLC2A4	Body	shelf
cg15417834	0.02891	0.0709551	-0.060484	0.060484	PPP1CB	Body	opensea
cg17911384	5.41395e-05	0.000628913	0.0604265	0.0604265	CALM3	Body	shelf
cg14920522	0.00515237	0.019114	-0.0601565	0.0601565	TRIP10	Body	shore
cg14284762	0.0691519	0.136782	0.0601272	0.0601272	PIK3R1	5'UTR	opensea
cg00238541	0.000508273	0.00334557	0.0600553	0.0600553	ACACB	Body	opensea
cg07126783	5.545e-09	1.2668e-06	0.0599687	0.0599687	RPTOR	Body	shore
cg08733250	0.000283341	0.00215473	0.0599353	0.0599353	PRKAR1B	Body	shelf
cg03802185	0.00871181	0.0283434	0.0598616	0.0598616	SH2B2	TSS1500	shore
cg19072817	0.00169776	0.00818718	-0.0597477	0.0597477	EIF4E1B	5'UTR	shore
cg05206206	0.00650072	0.0227046	-0.0596897	0.0596897	FLOT2	Body	opensea
cg00838397	2.30279e-06	6.64914e-05	0.0596866	0.0596866	HKDC1	Body	opensea
cg16001913	1.06615e-05	0.000200884	0.059297	0.059297	HK1	TSS200	opensea
cg09779027	6.20113e-06	0.000138734	0.0592879	0.0592879	INSR	Body	opensea
cg06323290	0.00935537	0.0299448	-0.0592258	0.0592258	HK1	5'UTR	opensea
cg25532673	6.08352e-05	0.000676591	-0.0592032	0.0592032	SHC1	Body	shelf
cg11359920	2.07698e-08	2.58888e-06	-0.0591554	0.0591554	IRS2	Body	opensea
cg25998564	3.27159e-06	8.70783e-05	-0.0590557	0.0590557	PPP1R3A	TSS1500	opensea
cg11961999	6.75746e-05	0.000733686	-0.0590421	0.0590421	PRKCZ	Body	opensea
cg23332193	7.29747e-08	6.39044e-06	-0.0589858	0.0589858	RAF1	Body	opensea
cg14417954	0.00102474	0.00555814	-0.0588559	0.0588559	PRKCZ	TSS1500	shore
cg07375836	0.00196993	0.00917684	-0.058807	0.058807	ACACA	5'UTR	shore
cg12989344	0.0995715	0.181439	-0.058788	0.058788	HRAS	Body	shore
cg14100973	0.0491887	0.10598	-0.0587235	0.0587235	MAPK10	5'UTR	opensea
cg13588073	0.00708311	0.0242835	-0.0586449	0.0586449	PRKAG2	TSS1500	opensea
cg27111150	0.000296668	0.00223746	-0.0583445	0.0583445	SORBS1	Body	opensea
cg05485635	0.00169051	0.00816231	0.0583186	0.0583186	MAP2K1	Body	opensea
cg18470397	0.0840866	0.159698	-0.0583136	0.0583136	HK2	Body	opensea
cg14252312	0.00413077	0.0160631	0.0583113	0.0583113	PDE3B	Body	opensea
cg20707333	0.00737135	0.0249198	0.0582547	0.0582547	PPP1R3D	3'UTR	island
cg01596520	0.00885862	0.0286898	-0.0581357	0.0581357	PRKACA	TSS200	shelf
cg26613742	0.00841193	0.0275359	-0.057772	0.057772	PRKACA	TSS200	shelf
cg15701203	1.56629e-07	1.0823e-05	-0.0577448	0.0577448	AKT2	3'UTR	opensea
cg22818074	0.111944	0.19858	0.0575842	0.0575842	MAP2K1	Body	opensea
cg05929272	0.000516424	0.00338703	-0.0575164	0.0575164	PRKAG2	Body	opensea
cg00354863	0.000608592	0.00380926	-0.0572382	0.0572382	EIF4EBP1	TSS1500	shore
cg07221496	0.0699689	0.137901	-0.057173	0.057173	SORBS1	Body	opensea
cg14126884	0.0689717	0.136619	0.0571585	0.0571585	RAPGEF1	Body	opensea
cg06109322	0.0230211	0.0592604	-0.0571513	0.0571513	PYGM	Body	opensea
cg02418175	0.000371631	0.00263301	-0.0570362	0.0570362	INPP5A	Body	island
cg03639919	0.0113455	0.034579	-0.0569838	0.0569838	GCK	Body	opensea
cg04658243	1.68645e-08	2.43337e-06	0.0569008	0.0569008	RPTOR	Body	shore
cg26673980	0.0078842	0.0261994	0.0568984	0.0568984	PRKAG2	5'UTR	opensea
cg18079499	0.00012454	0.00116174	-0.0566167	0.0566167	CALM1	Body	shelf
cg05003326	0.00142784	0.00717041	-0.0566132	0.0566132	SORBS1	Body	opensea
cg15331383	0.00281737	0.0121444	0.0565654	0.0565654	RPTOR	Body	shelf
cg07729608	5.21893e-06	0.000120233	-0.0565298	0.0565298	SORBS1	Body	opensea
cg09441903	0.0244515	0.0622991	0.0564852	0.0564852	PRKAG2	Body	opensea
cg05902503	0.00405881	0.0158381	0.0562636	0.0562636	MAPK3	Body	shore
cg14220195	0.00076244	0.0045184	-0.0562617	0.0562617	MAPK10	5'UTR	opensea
cg09382226	0.00301635	0.0127909	-0.0561451	0.0561451	PRKAR1B	Body	shelf
cg22615330	0.0050829	0.0189074	-0.0561041	0.0561041	PRKAG2	5'UTR	opensea
cg08950508	4.75754e-09	1.19713e-06	0.0560586	0.0560586	PRKACB	Body	opensea
cg01500851	0.00288678	0.0123369	0.0560066	0.0560066	RHOQ	TSS1500	shore
cg09774589	0.000315156	0.00234031	0.0559984	0.0559984	PPP1R3B	TSS1500	island
cg00130343	1.27447e-05	0.000229113	-0.055812	0.055812	PRKCZ	5'UTR	opensea
cg12816748	0.000461366	0.0031077	0.0557839	0.0557839	PRKAR1B	TSS200	shore
cg22272698	2.74753e-05	0.000389256	-0.0556216	0.0556216	ACACA	5'UTR	shore
cg17522463	0.00599335	0.0214082	0.0555725	0.0555725	MKNK1-AS1	Body	opensea
cg23604876	0.134764	0.229476	-0.0555591	0.0555591	PPP1R3E	TSS1500	shore
cg00912573	0.203633	0.31354	-0.0555386	0.0555386	IRS1	1stExon	shore
cg18758433	0.0226215	0.0584514	0.055535	0.055535	RPTOR	Body	opensea
cg22637834	0.00584028	0.0210396	-0.0554879	0.0554879	AKT3	TSS1500	opensea
cg00030476	0.00107753	0.00573005	0.0554576	0.0554576	PRKAB2	Body	shore
cg06330323	0.00202609	0.00936684	0.0553132	0.0553132	TSC2	Body	shore
cg05433657	0.000976509	0.00539738	-0.0552658	0.0552658	HKDC1	Body	shore
cg18795433	0.00226532	0.0102144	0.0551198	0.0551198	TSC2	Body	island
cg26307814	0.000238201	0.0019011	-0.0549068	0.0549068	PIK3CD	3'UTR	shelf
cg19075252	0.0492003	0.10598	0.054903	0.054903	PRKAG3	TSS1500	opensea
cg05477444	0.0309755	0.0745561	0.0548698	0.0548698	INPP5A	Body	island
cg26335530	2.03501e-05	0.000313429	-0.0548573	0.0548573	PRKCZ	5'UTR	shelf
cg11391912	0.00018562	0.00158282	-0.0548493	0.0548493	GRB2	5'UTR	opensea
cg06109664	0.00402199	0.0157519	-0.0548308	0.0548308	EIF4E	5'UTR	island
cg16015295	0.0224007	0.0579902	-0.0547806	0.0547806	RPTOR	Body	shelf
cg01143683	0.00162582	0.00795927	0.0547539	0.0547539	FOXO1	Body	opensea
cg16940601	0.00104515	0.00561576	0.0545284	0.0545284	INSR	Body	opensea
cg25092283	4.65353e-05	0.000572092	0.054495	0.054495	SORBS1	TSS1500	shore
cg01434679	0.000166582	0.00145905	-0.0544419	0.0544419	PIK3CD	Body	shore
cg15323495	0.000192929	0.00161258	-0.0544125	0.0544125	RAPGEF1	Body	opensea
cg04075024	0.00184176	0.00872805	0.0543996	0.0543996	PPP1CA	Body	shore
cg08846483	4.95467e-09	1.19713e-06	0.054337	0.054337	GSK3B	Body	opensea
cg08133010	6.22442e-06	0.000138734	0.0543264	0.0543264	GRB2	Body	opensea
cg02696607	0.00033697	0.00244716	0.0543167	0.0543167	PRKAG2	5'UTR	opensea
cg00007221	0.00489675	0.0184275	0.054243	0.054243	PTPRF	5'UTR	shore
cg02738255	0.000195161	0.00162141	0.0541558	0.0541558	PYGB	Body	shelf
cg16841014	0.044385	0.0979759	-0.0540156	0.0540156	RPTOR	Body	opensea
cg01760189	0.00244112	0.010829	-0.0539247	0.0539247	ACACA	TSS1500	opensea
cg15670214	0.0147696	0.0422439	0.0538306	0.0538306	AKT2	Body	opensea
cg05502103	0.00311097	0.0130709	-0.0537839	0.0537839	PRKAR1B	3'UTR	island
cg18121190	0.00376568	0.0150162	0.0537653	0.0537653	INPP5A	Body	shore
cg16928487	0.00714724	0.0244164	0.0537178	0.0537178	SREBF1	TSS1500	shore
cg03888078	2.29186e-06	6.64914e-05	-0.0536774	0.0536774	PRKAR1B	5'UTR	shore
cg06836772	0.000980669	0.0053986	-0.0536556	0.0536556	PRKAA2	TSS1500	shore
cg15608943	0.0159078	0.0448648	0.053567	0.053567	SORBS1	5'UTR	opensea
cg16757375	0.000220411	0.00178774	-0.0535574	0.0535574	MAPK1	3'UTR	opensea
cg09240047	0.00603967	0.0215176	0.0535285	0.0535285	MAPK9	TSS200	island
cg06711830	0.000327302	0.00240716	-0.0535023	0.0535023	PRKCI	Body	opensea
cg00388154	0.0213425	0.0559909	-0.053486	0.053486	CALML4	TSS1500	opensea
cg09129132	7.59412e-08	6.50603e-06	0.0534407	0.0534407	IKBKB	Body	opensea
cg02732175	0.00334041	0.0138126	0.053374	0.053374	EIF4E1B	Body	shelf
cg21314578	0.0193136	0.05191	-0.053366	0.053366	AKT2	ExonBnd	opensea
cg09618690	0.00540229	0.0198132	0.053318	0.053318	FOXO1	Body	opensea
cg08000672	1.90271e-07	1.21309e-05	-0.0532686	0.0532686	PRKCZ	Body	opensea
cg17892830	0.000459841	0.00310435	-0.0532662	0.0532662	PRKACG	TSS1500	shore
cg08311376	0.0241871	0.0618842	0.053201	0.053201	MAPK10	5'UTR	opensea
cg19894975	0.000152187	0.00137244	0.0531745	0.0531745	SOCS3	5'UTR	island
cg05475446	0.078409	0.150848	0.0530248	0.0530248	RPTOR	Body	opensea
cg03876812	0.000297493	0.0022406	0.0529859	0.0529859	AKT3	Body	opensea
cg04643397	0.000714496	0.00430503	-0.0529736	0.0529736	PRKAB1	3'UTR	opensea
cg15576292	0.00348023	0.014283	0.0529559	0.0529559	FLOT1	Body	shore
cg13888192	0.0342523	0.080707	-0.0529081	0.0529081	PRKAR1A	Body	opensea
cg10883455	0.000132284	0.00122519	0.0528405	0.0528405	PPP1CA	TSS1500	shore
cg00806900	0.00421052	0.0162694	-0.0528053	0.0528053	ACACB	Body	shelf
cg18073658	0.0489551	0.105553	-0.052614	0.052614	MAPK10	Body	opensea
cg19122260	0.000323479	0.00238713	-0.0525197	0.0525197	RPTOR	Body	opensea
cg10880603	0.0028222	0.0121556	0.0524512	0.0524512	RPTOR	Body	shelf
cg14163740	7.83969e-06	0.000165965	0.0524316	0.0524316	PRKCZ	5'UTR	shore
cg15590006	0.000378663	0.00266631	-0.0524212	0.0524212	PIK3CD	5'UTR	opensea
cg21746472	9.85714e-07	3.75324e-05	0.052309	0.052309	IKBKB	ExonBnd	opensea
cg00976532	0.000528629	0.00344646	-0.0522021	0.0522021	PDPK1	Body	shelf
cg01433447	0.000969308	0.00536985	0.0521671	0.0521671	SORBS1	5'UTR	opensea
cg02607043	0.00502596	0.0187486	0.0521293	0.0521293	PRKCZ	5'UTR	shore
cg13436177	2.9144e-05	0.000404024	0.052074	0.052074	RAF1	5'UTR	opensea
cg15991632	1.4469e-07	1.0231e-05	-0.0520006	0.0520006	PHKB	Body	opensea
cg08474669	0.000948165	0.00529636	0.0519632	0.0519632	PYGM	TSS1500	shelf
cg14506152	0.000266307	0.00204791	-0.0519351	0.0519351	PRKAR2B	Body	opensea
cg22627876	6.40232e-06	0.00014098	-0.0519319	0.0519319	PRKCZ	Body	shore
cg07804434	0.00330589	0.0137042	0.051917	0.051917	PRKAG2	Body	opensea
cg27580905	1.56816e-05	0.000264561	-0.0518989	0.0518989	SOS1	Body	opensea
cg01946656	0.00201333	0.00933146	-0.0518223	0.0518223	HK1	Body	opensea
cg25496764	0.00643276	0.0225229	0.0517862	0.0517862	RPTOR	Body	opensea
cg21015705	3.73353e-06	9.65384e-05	0.0517197	0.0517197	INPP5A	Body	opensea
cg11024682	0.00204548	0.00941676	-0.0517025	0.0517025	SREBF1	Body	shelf
cg10513302	0.0392085	0.0896124	0.0516611	0.0516611	FLOT1	Body	opensea
cg08151809	9.44339e-05	0.000938009	-0.0516609	0.0516609	PRKAG2	Body	island
cg21268658	0.0114304	0.0347603	0.0514902	0.0514902	PTPRF	5'UTR	shore
cg23965590	0.0129638	0.0381538	0.0514581	0.0514581	CBL	Body	opensea
cg22021934	5.92787e-05	0.000664673	-0.0514335	0.0514335	CRK	Body	shore
cg03098577	5.0217e-09	1.19713e-06	0.0514301	0.0514301	CBLB	Body	opensea
cg25583721	0.000124586	0.00116174	-0.0513844	0.0513844	PRKAR1B	Body	opensea
cg16304656	0.00463332	0.0175688	0.051364	0.051364	PRKAR1B	Body	shelf
cg07107315	0.148985	0.247316	0.0513284	0.0513284	PYGB	Body	opensea
cg01564380	0.00573387	0.0207517	0.0513278	0.0513278	PRKAR1B	Body	opensea
cg17899718	0.121059	0.211121	0.0513223	0.0513223	MAPK1	Body	opensea
cg17339923	0.00103983	0.00561059	0.051295	0.051295	PRKAR1B	Body	shore
cg09389091	0.0218565	0.0569456	0.051289	0.051289	RPTOR	Body	opensea
cg13534892	7.83381e-08	6.60812e-06	0.0512664	0.0512664	FLOT1	Body	opensea
cg04687318	2.64517e-08	3.02156e-06	-0.0511968	0.0511968	PRKAG2	Body	opensea
cg26723446	0.107024	0.191589	-0.051168	0.051168	MKNK2	Body	shore
cg05651511	0.00485168	0.0182704	0.0511383	0.0511383	RPTOR	Body	opensea
cg16644344	6.79579e-05	0.00073639	-0.0510912	0.0510912	PRKCZ	Body	opensea
cg05020989	0.00505405	0.0188385	0.0509501	0.0509501	EIF4E	Body	opensea
cg14309246	2.84015e-08	3.1145e-06	0.0509305	0.0509305	AKT2	TSS1500	shore
cg22688513	0.00896991	0.0289988	-0.0507157	0.0507157	PRKAR2B	Body	opensea
cg12789068	0.00371778	0.0148793	0.0505362	0.0505362	AKT1	Body	shelf
cg17959631	0.0270472	0.0674703	0.0505348	0.0505348	GCK	Body	shelf
cg18633230	0.00352949	0.0143883	0.0504324	0.0504324	PRKAG2	Body	shelf
cg05605414	0.0123059	0.0367502	-0.0503763	0.0503763	PIK3CD	5'UTR	opensea
cg08939850	0.00358427	0.0145037	0.0502774	0.0502774	RPTOR	Body	shore
cg08667809	0.107502	0.192214	0.0502339	0.0502339	SORBS1	5'UTR	opensea
cg06425183	0.0560822	0.116698	0.0500769	0.0500769	PRKAR1B	Body	opensea
cg06732450	4.95854e-10	5.0148e-07	0.0500585	0.0500585	INPP5A	Body	opensea
cg08287211	1.05324e-05	0.000200343	0.0500078	0.0500078	INPP5A	Body	shore
cg13055001	2.7808e-10	5.0148e-07	0.049939	0.049939	PPP1CA	TSS1500	shore
cg17780935	9.05059e-05	0.000908872	0.049927	0.049927	PRKACB	TSS1500	opensea
cg16638092	0.000187837	0.00159133	0.0497793	0.0497793	RPTOR	Body	shore
cg20650505	0.000929407	0.00520525	-0.049772	0.049772	PIK3R3	Body	opensea
cg10717448	4.24123e-07	2.07631e-05	0.0497034	0.0497034	PRKAR1B	Body	shore
cg02851047	0.00119353	0.00623842	0.0496827	0.0496827	TSC2	Body	shore
cg12541935	0.000771432	0.00455764	0.0496514	0.0496514	PRKAG2	Body	opensea
cg15601244	0.00219793	0.00996534	0.0495502	0.0495502	SH2B2	Body	shore
cg12902444	3.84297e-06	9.75508e-05	-0.0495422	0.0495422	SHC4	Body	opensea
cg26688936	0.00239686	0.0106932	0.0494958	0.0494958	TSC2	Body	shelf
cg11037477	4.62365e-06	0.000110705	-0.0494121	0.0494121	EIF4E	5'UTR	shore
cg04011698	0.00725423	0.0246132	-0.0494096	0.0494096	SHC3	Body	opensea
cg09834652	0.0292707	0.0714564	-0.0491873	0.0491873	PPP1R3B	Body	opensea
cg15090136	0.00194693	0.00909288	0.0491563	0.0491563	EXOC7	Body	opensea
cg00520925	0.00571058	0.020681	-0.0490446	0.0490446	PYGM	TSS1500	opensea
cg13877163	4.49529e-05	0.000558963	0.049042	0.049042	PRKAG2	Body	opensea
cg00500982	0.000640844	0.00395692	-0.0490383	0.0490383	AKT2	Body	opensea
cg27281860	0.0575277	0.119118	0.0490229	0.0490229	CBLB	Body	opensea
cg21654245	0.0174225	0.0480676	0.0489649	0.0489649	RPTOR	Body	opensea
cg24914818	0.000796167	0.00465889	0.0489577	0.0489577	ACACA	5'UTR	opensea
cg16737749	0.00494662	0.0185388	0.0489129	0.0489129	MAPK10	5'UTR	opensea
cg19016296	0.00770615	0.0257639	0.0488694	0.0488694	PIK3R1	Body	opensea
cg02816429	0.0299382	0.0725737	-0.0487782	0.0487782	GCK	TSS200	opensea
cg05914150	0.177163	0.282707	0.0487679	0.0487679	PIK3R1	TSS200	opensea
cg05995891	0.0629695	0.12778	-0.048754	0.048754	CALML6	Body	shelf
cg12092651	0.000722287	0.00433293	-0.0486378	0.0486378	MAP2K2	Body	opensea
cg12670756	0.0129029	0.0380359	-0.0486053	0.0486053	PRKCI	TSS200	island
cg27003581	1.25581e-05	0.000227249	-0.0485294	0.0485294	MAP2K2	Body	opensea
cg16786144	0.0132311	0.0386706	0.0485281	0.0485281	INPP5A	Body	shelf
cg20749955	0.0198906	0.0532	-0.0485083	0.0485083	PPP1R3B	TSS1500	shore
cg22176040	0.00325333	0.0135239	-0.048428	0.048428	SORBS1	TSS1500	opensea
cg14481469	0.00529755	0.0195731	-0.0483264	0.0483264	PRKAG2	Body	shelf
cg25775445	0.00660067	0.0229933	-0.0483131	0.0483131	SORBS1	5'UTR	opensea
cg06214126	1.79527e-08	2.50433e-06	0.048286	0.048286	HK1	Body	shelf
cg24951402	2.12474e-08	2.58888e-06	-0.0482747	0.0482747	RPTOR	Body	opensea
cg02534360	0.00358393	0.0145037	-0.0482736	0.0482736	PRKAR1A	TSS1500	island
cg06630241	0.00285949	0.0122681	0.0482646	0.0482646	SOCS2	Body	shore
cg26447747	0.0538877	0.113336	-0.048263	0.048263	SHC2	Body	island
cg22851257	1.02632e-05	0.000199311	0.0481671	0.0481671	SORBS1	5'UTR	opensea
cg11425201	0.0129288	0.0380917	0.0481153	0.0481153	AKT2	Body	opensea
cg20546648	1.4342e-05	0.000248852	-0.0481118	0.0481118	PIK3CD	5'UTR	opensea
cg02251850	0.0629212	0.127729	-0.0480342	0.0480342	RPTOR	Body	shore
cg10016690	0.000339673	0.00246353	-0.0479789	0.0479789	SHC2	Body	shore
cg12828504	4.21665e-06	0.000104144	-0.0479023	0.0479023	PRKCZ	5'UTR	shelf
cg21272956	0.00528732	0.0195617	-0.0478663	0.0478663	PRKACB	Body	opensea
cg21480965	8.92473e-05	0.000902008	-0.0478323	0.0478323	AKT3	3'UTR	opensea
cg05403879	0.000176193	0.00152376	-0.04778	0.04778	MTOR	Body	opensea
cg23412850	0.0686665	0.136264	0.0477497	0.0477497	SOCS2	Body	island
cg15547672	0.0984466	0.180129	0.0477494	0.0477494	RPTOR	Body	opensea
cg22169301	0.053374	0.112419	0.0477087	0.0477087	AKT2	5'UTR	opensea
cg08106279	7.30894e-06	0.000158399	-0.0476974	0.0476974	PRKCZ	5'UTR	shelf
cg10103581	0.00371077	0.0148621	-0.0475612	0.0475612	SHC4	Body	opensea
cg13047822	4.14666e-05	0.000531218	-0.0474724	0.0474724	PRKACB	Body	opensea
cg25264268	5.39237e-05	0.00062809	0.0474277	0.0474277	SHC2	Body	island
cg04392286	2.51866e-05	0.000369044	-0.0474064	0.0474064	HK2	TSS1500	shelf
cg22775413	0.0114781	0.0348528	0.0473925	0.0473925	PCK2	TSS1500	shore
cg14576291	0.0838146	0.159457	0.0473502	0.0473502	RAPGEF1	Body	opensea
cg25001831	2.72455e-05	0.000388062	-0.0472841	0.0472841	PRKAR1B	Body	opensea
cg03982150	6.98608e-05	0.000752548	0.0472504	0.0472504	PRKAR1B	TSS1500	shore
cg06888836	5.74057e-05	0.000649909	-0.0470747	0.0470747	PRKCZ	5'UTR	opensea
cg03330972	0.106027	0.190543	-0.0470601	0.0470601	RAF1	Body	opensea
cg05456654	0.000277829	0.00211869	-0.0470595	0.0470595	RPTOR	Body	opensea
cg14535017	0.000824686	0.00475734	-0.0470269	0.0470269	MTOR	Body	opensea
cg26310920	3.367e-09	1.19713e-06	0.0469838	0.0469838	GCK	TSS1500	opensea
cg10494355	0.0767069	0.14842	-0.0469397	0.0469397	RAPGEF1	Body	opensea
cg26100256	1.57914e-07	1.0823e-05	0.0469349	0.0469349	ACACA	Body	opensea
cg08532659	0.00205156	0.00942891	-0.0468542	0.0468542	CRK	TSS1500	shore
cg09663850	5.4285e-05	0.00062927	0.0468023	0.0468023	PRKAG3	Body	opensea
cg14437996	8.39067e-05	0.000858347	-0.046768	0.046768	SHC3	TSS1500	shore
cg01412400	0.0289859	0.0710397	0.0467668	0.0467668	RPTOR	Body	shelf
cg00666525	0.278018	0.396662	-0.046739	0.046739	SHC2	Body	shore
cg07843733	0.00395394	0.0155475	0.0466813	0.0466813	BRAF	Body	opensea
cg09516200	0.00406135	0.0158381	-0.0466675	0.0466675	RPTOR	Body	opensea
cg15225991	0.000285129	0.00216232	0.0466358	0.0466358	INPP5A	Body	shore
cg00038450	0.00123497	0.00638617	-0.0465524	0.0465524	IKBKB	Body	opensea
cg04281981	0.0136027	0.0395879	-0.0465244	0.0465244	PRKCZ	Body	opensea
cg22725635	0.0488703	0.105494	0.04644	0.04644	PPP1CC	Body	opensea
cg03209189	1.60875e-05	0.000269748	0.0464251	0.0464251	RPTOR	Body	shelf
cg24811957	7.46396e-07	3.10037e-05	0.0463641	0.0463641	PPP1CA	1stExon	shore
cg21005104	7.31687e-10	5.0148e-07	-0.0463493	0.0463493	PYGL	Body	opensea
cg25144179	0.106939	0.191554	-0.0463456	0.0463456	SHC3	Body	opensea
cg13832457	0.00871547	0.0283434	-0.046344	0.046344	PRKAR1B	Body	shore
cg11723234	0.0168186	0.0468816	-0.0463174	0.0463174	EXOC7	Body	opensea
cg19145477	0.0100999	0.0317532	0.0463035	0.0463035	GRB2	Body	opensea
cg17592667	0.0205285	0.0546661	-0.046302	0.046302	CALML6	3'UTR	shore
cg26104690	0.00759581	0.0254727	-0.046228	0.046228	PRKAR2B	Body	opensea
cg26493353	0.00102034	0.00554462	-0.0462267	0.0462267	SHC3	TSS200	shore
cg12467096	0.00180018	0.00858996	-0.0461208	0.0461208	INPPL1	Body	island
cg01865937	0.02698	0.0673333	-0.0460411	0.0460411	SHC3	Body	shore
cg10920419	0.0121517	0.0364284	-0.0459876	0.0459876	RPTOR	Body	opensea
cg02400877	0.0289499	0.0710211	0.0459628	0.0459628	INPP5A	Body	opensea
cg05252919	0.0451267	0.0991703	0.0459364	0.0459364	AKT2	Body	opensea
cg06297470	4.67818e-06	0.000111524	-0.0458998	0.0458998	PDE3B	Body	shore
cg01222216	4.48912e-05	0.000558963	-0.0458961	0.0458961	PDPK1	3'UTR	opensea
cg04914104	0.00123379	0.00638617	0.0458906	0.0458906	PIK3CB	ExonBnd	opensea
cg09986070	0.0293229	0.0715423	-0.0458177	0.0458177	FBP1	Body	opensea
cg06405441	4.0583e-05	0.000523568	-0.0458129	0.0458129	PRKACA	Body	opensea
cg17284162	0.011947	0.0359524	0.0458093	0.0458093	PYGM	TSS1500	shelf
cg07912723	0.000984306	0.00540471	-0.0457978	0.0457978	PRKCZ	Body	opensea
cg08092875	0.0252958	0.0638863	0.0457539	0.0457539	TSC1	3'UTR	opensea
cg02167717	0.00586881	0.0210803	-0.0457281	0.0457281	PYGM	Body	shelf
cg00497046	6.63635e-05	0.000724843	0.045725	0.045725	PRKAR1B	Body	island
cg21165395	6.25672e-05	0.000690253	-0.045712	0.045712	ACACB	Body	opensea
cg24808162	9.57695e-05	0.000949556	0.0456891	0.0456891	PTPRF	Body	shelf
cg13762486	0.0302638	0.0731966	0.0456866	0.0456866	RPTOR	Body	shore
cg04602791	0.00165244	0.0080536	-0.0456608	0.0456608	CALM1	TSS1500	shore
cg26464318	0.00133238	0.00680841	0.0456481	0.0456481	PIK3CB	Body	opensea
cg22991936	0.000875584	0.00498011	0.0456413	0.0456413	AKT1	Body	shelf
cg02650215	4.76493e-05	0.000578437	0.0456118	0.0456118	PRKCZ	Body	shore
cg05263838	0.000180006	0.00154941	-0.0455593	0.0455593	IRS1	3'UTR	shelf
cg24335936	0.000483583	0.00322565	-0.0455418	0.0455418	SHC4	Body	opensea
cg16432885	0.00400106	0.0157035	0.0455406	0.0455406	GSK3B	Body	opensea
cg23950925	0.0719812	0.141156	-0.0455184	0.0455184	AKT2	5'UTR	opensea
cg15127607	0.0767319	0.14842	0.0454742	0.0454742	HK1	TSS1500	opensea
cg12720090	0.000208744	0.00171339	0.0454218	0.0454218	PIK3CA	Body	opensea
cg06550676	0.0213078	0.0559386	-0.0454175	0.0454175	PRKAR2B	Body	opensea
cg16664523	1.25954e-07	9.20808e-06	-0.0453787	0.0453787	PIK3R1	Body	shore
cg10167301	0.051601	0.10979	0.0453137	0.0453137	RAPGEF1	Body	opensea
cg00988841	0.111159	0.197756	0.0452181	0.0452181	INPP5A	Body	shore
cg26178664	5.22618e-07	2.408e-05	-0.0452069	0.0452069	CALML3	1stExon	island
cg05537380	8.7711e-09	1.78118e-06	-0.045187	0.045187	SHC2	1stExon	island
cg14808739	0.00013392	0.00123144	-0.0451782	0.0451782	SREBF1	TSS1500	shore
cg20018660	3.97091e-08	4.16043e-06	0.0450743	0.0450743	AKT1	Body	opensea
cg23559763	0.0277627	0.0687238	0.0450455	0.0450455	BAD	Body	opensea
cg00909226	0.00457435	0.0173954	0.0449889	0.0449889	MTOR	Body	opensea
cg04146995	0.00407338	0.0158737	-0.0449815	0.0449815	PRKCZ	Body	shelf
cg00061209	0.205908	0.315537	0.0449249	0.0449249	INPP5A	Body	opensea
cg16316923	0.01583	0.0446941	0.044908	0.044908	RPTOR	Body	opensea
cg14398860	0.000318116	0.00235389	0.0448335	0.0448335	INPP5A	Body	opensea
cg09415366	0.00437304	0.0167791	-0.0448041	0.0448041	INPP5A	Body	opensea
cg03838931	0.214315	0.325871	-0.0445188	0.0445188	RPTOR	Body	opensea
cg02622094	2.28418e-05	0.000345017	-0.0444573	0.0444573	FOXO1	3'UTR	opensea
cg04266460	0.00011225	0.00107412	0.0444569	0.0444569	SOCS1	Body	island
cg26031036	0.00342103	0.0140958	-0.0444291	0.0444291	PRKAR1A	5'UTR	opensea
cg26549601	0.0126629	0.0374896	0.044426	0.044426	INPP5A	Body	shelf
cg13918804	4.21611e-07	2.07631e-05	-0.0444246	0.0444246	PRKCZ	5'UTR	shelf
cg24715732	0.0839577	0.159563	-0.0443755	0.0443755	PRKCZ	1stExon	island
cg06632603	4.49576e-05	0.000558963	0.0443302	0.0443302	MTOR	3'UTR	opensea
cg17863337	0.0114799	0.0348528	-0.0442041	0.0442041	PRKACB	TSS200	opensea
cg24526103	0.00290297	0.0123867	-0.0441996	0.0441996	IRS2	Body	shore
cg16567319	0.00975348	0.0308945	-0.0440839	0.0440839	HRAS	5'UTR	shore
cg12125907	0.000807742	0.00469794	0.0440015	0.0440015	INSR	Body	opensea
cg23994191	0.000716829	0.00430962	0.0439954	0.0439954	HK3	Body	opensea
cg26119845	0.0373662	0.0863739	0.043971	0.043971	PIK3R2	Body	shore
cg05302531	0.000669395	0.00410088	0.0439632	0.0439632	SH2B2	Body	island
cg26430365	0.000122544	0.00114856	-0.0439081	0.0439081	PRKCZ	Body	opensea
cg15102821	0.00348476	0.0142909	-0.0438968	0.0438968	CALML6	TSS1500	opensea
cg00789862	3.88826e-07	1.9642e-05	0.0438797	0.0438797	INPP5A	Body	opensea
cg04953357	0.258978	0.375456	-0.0438436	0.0438436	RAPGEF1	Body	opensea
cg15442610	2.05968e-05	0.000315454	-0.0438122	0.0438122	PIK3R2	TSS200	island
cg21020221	0.00538306	0.0197691	-0.0438002	0.0438002	SREBF1	Body	opensea
cg06298933	2.48173e-05	0.000368761	0.0436632	0.0436632	AKT1	Body	shore
cg22900057	1.82321e-06	5.73724e-05	0.0436324	0.0436324	INPP5A	Body	shelf
cg11237988	0.0695861	0.137443	-0.0436143	0.0436143	GSK3B	Body	opensea
cg23694389	0.00154865	0.00769135	-0.0434327	0.0434327	MKNK2	Body	shore
cg06697074	1.7053e-05	0.00027911	0.0434124	0.0434124	PRKAR2B	Body	opensea
cg16512854	0.000378818	0.00266631	-0.0433794	0.0433794	PIK3CD	5'UTR	shelf
cg03120555	0.00403668	0.0157868	0.0433766	0.0433766	PRKAR1B	Body	shore
cg03345391	0.0157183	0.0444811	-0.0432238	0.0432238	GCK	Body	opensea
cg18576374	0.000534537	0.00346438	0.0432093	0.0432093	RPTOR	Body	opensea
cg11056108	5.64406e-05	0.000643376	0.0431953	0.0431953	TSC2	Body	shore
cg27049076	9.228e-06	0.000187397	0.0431703	0.0431703	PPP1CA	Body	island
cg01542452	0.0567525	0.11778	0.0430661	0.0430661	INPP5A	Body	opensea
cg14972143	2.90742e-06	7.9707e-05	-0.0430116	0.0430116	EIF4E	5'UTR	shore
cg10596768	0.0614838	0.125322	-0.042995	0.042995	G6PC	1stExon	opensea
cg04947391	0.00548503	0.0200496	-0.0429767	0.0429767	MAPK10	Body	opensea
cg16677367	0.0011428	0.00601361	0.0427692	0.0427692	FBP1	Body	opensea
cg10608858	5.76964e-07	2.51071e-05	0.0427274	0.0427274	PRKAG2	5'UTR	opensea
cg17212489	0.00843521	0.0275792	0.0427222	0.0427222	INSR	Body	opensea
cg12378893	0.0140822	0.0406811	0.0427065	0.0427065	PYGB	Body	opensea
cg13061317	0.0501289	0.107426	-0.0426913	0.0426913	RAPGEF1	Body	opensea
cg08129331	0.0657276	0.131735	-0.0426498	0.0426498	RPTOR	Body	opensea
cg07326267	0.0223482	0.0578815	0.0426249	0.0426249	INPP5A	Body	opensea
cg07908805	0.0202195	0.0539482	0.042574	0.042574	SHC2	Body	island
cg14371107	0.025717	0.0646817	-0.042568	0.042568	INPPL1	TSS1500	island
cg11285284	0.0148865	0.0424454	0.04255	0.04255	FLOT1	Body	shore
cg14112062	0.0185941	0.0504212	0.0425236	0.0425236	SHC2	Body	shore
cg27550973	0.00712332	0.024365	-0.0424842	0.0424842	AKT1	Body	shore
cg04777824	3.66092e-06	9.55295e-05	0.0424166	0.0424166	ACACB	Body	opensea
cg00428638	0.00254739	0.0112097	0.0424127	0.0424127	INSR	Body	opensea
cg07790887	1.08774e-05	0.000202172	-0.0423868	0.0423868	PRKACB	TSS1500	opensea
cg12513025	0.000726642	0.00434954	-0.0423841	0.0423841	PRKAR1A	5'UTR	shelf
cg24689021	3.77638e-06	9.67564e-05	-0.0423622	0.0423622	BAD	Body	shelf
cg06443644	0.00141908	0.00713836	0.0423514	0.0423514	CALML6	TSS1500	opensea
cg17280398	9.09166e-07	3.58315e-05	0.042322	0.042322	PIK3CB	TSS200	opensea
cg00456448	1.8907e-05	0.000299096	-0.0423037	0.0423037	PRKCZ	Body	opensea
cg03148461	2.78889e-05	0.000391087	-0.0422558	0.0422558	BRAF	TSS1500	shore
cg06204101	0.00361373	0.0145692	-0.0422329	0.0422329	PRKCZ	5'UTR	shore
cg04328826	6.17821e-05	0.000683654	-0.0421996	0.0421996	TSC2	Body	shore
cg10648455	0.000520431	0.00340923	0.0421787	0.0421787	ACACB	Body	opensea
cg14168545	7.69317e-05	0.000808102	0.0421697	0.0421697	FOXO1	Body	shelf
cg15694704	0.000801741	0.00468651	-0.0421327	0.0421327	RPTOR	Body	shelf
cg16829244	0.00081944	0.00473944	0.0421132	0.0421132	INPP5A	Body	opensea
cg18465702	0.0740623	0.144434	0.042075	0.042075	FOXO1	Body	opensea
cg16986150	0.0342423	0.080707	0.0420403	0.0420403	PRKAG2	Body	opensea
cg06436185	0.00138671	0.00701412	0.04203	0.04203	PRKAG2	Body	opensea
cg17707292	0.0186114	0.050443	-0.0420296	0.0420296	PHKG2	Body	shelf
cg17393572	0.000450725	0.00307289	-0.0419641	0.0419641	HK3	TSS200	opensea
cg00848480	0.0307224	0.0741422	-0.0419418	0.0419418	PRKAR1B	Body	island
cg00696269	0.00924971	0.0297107	-0.0419181	0.0419181	PYGM	1stExon	opensea
cg26533635	0.107518	0.192214	0.041916	0.041916	PRKAR2B	TSS1500	shore
cg06975080	0.000609595	0.00381118	0.0418972	0.0418972	RPTOR	Body	island
cg06485139	2.57221e-07	1.48655e-05	-0.0418872	0.0418872	HK3	Body	shore
cg06315149	4.31969e-05	0.000549533	0.0418793	0.0418793	PRKCZ	5'UTR	shelf
cg03729670	0.00122627	0.00636105	-0.0418105	0.0418105	PRKAR1B	Body	shore
cg04318178	0.0311813	0.0748954	0.041697	0.041697	RAPGEF1	Body	opensea
cg14209576	0.0661235	0.132271	-0.0416833	0.0416833	PTPRF	Body	opensea
cg01823726	0.0150697	0.0429216	-0.0416706	0.0416706	TSC2	Body	shore
cg20863284	0.00721069	0.0245279	-0.0416384	0.0416384	GRB2	Body	opensea
cg21679841	5.37062e-07	2.43248e-05	0.0416347	0.0416347	IKBKB	Body	opensea
cg02992714	0.111716	0.198361	0.0416003	0.0416003	INSR	Body	opensea
cg00403963	0.0873481	0.164807	0.0415831	0.0415831	INSR	Body	opensea
cg08570343	0.00144321	0.00723319	-0.0415208	0.0415208	PRKAR2B	Body	opensea
cg11593247	0.00214095	0.00974177	-0.0415075	0.0415075	PYGM	Body	opensea
cg08815978	4.34678e-07	2.09065e-05	0.041488	0.041488	RHEB	Body	shore
cg20994801	0.00204811	0.00942095	-0.0414824	0.0414824	PIK3CD	TSS1500	shore
cg01052512	0.00084614	0.00484784	0.041462	0.041462	TSC2	Body	shore
cg09244100	0.00203481	0.0093913	0.0414464	0.0414464	PRKAG3	TSS1500	opensea
cg20686125	0.00456867	0.0173954	0.0414341	0.0414341	AKT3	Body	opensea
cg14089636	0.000634832	0.00393309	0.0413112	0.0413112	PIK3CD	5'UTR	opensea
cg15908654	0.0142893	0.0411494	-0.041275	0.041275	PRKAR1A	5'UTR	opensea
cg24008117	8.60885e-06	0.000176788	0.0412484	0.0412484	SOCS4	Body	opensea
cg07044749	0.0020658	0.00947053	-0.0412373	0.0412373	SORBS1	5'UTR	opensea
cg11630148	0.00394041	0.0155099	-0.0412353	0.0412353	INPP5A	Body	opensea
cg12563872	0.0933383	0.173113	0.0412194	0.0412194	CRKL	Body	opensea
cg20356482	0.0330486	0.0784439	0.0411859	0.0411859	FBP2	TSS200	opensea
cg13433951	0.00166008	0.00807655	-0.0411579	0.0411579	PTPRF	3'UTR	opensea
cg06796451	0.0103944	0.0323454	-0.0411379	0.0411379	MAPK9	TSS200	opensea
cg10979353	0.0180479	0.0493929	0.0411283	0.0411283	SORBS1	5'UTR	opensea
cg16235088	3.97487e-06	9.99734e-05	0.0410493	0.0410493	MAPK9	TSS1500	shore
cg16439394	1.08723e-05	0.000202172	0.0410246	0.0410246	PRKAR1B	Body	shore
cg09489048	0.00357616	0.014503	0.0409634	0.0409634	PPP1CA	TSS1500	shore
cg08240068	0.048644	0.105089	0.0409107	0.0409107	RAPGEF1	Body	opensea
cg08064286	0.0319302	0.0762183	-0.0409079	0.0409079	PRKCZ	Body	opensea
cg13159505	1.55692e-08	2.43337e-06	0.040891	0.040891	RPTOR	Body	shelf
cg04685975	0.00099829	0.0054684	-0.0407667	0.0407667	GRB2	Body	opensea
cg23729501	0.0195431	0.0524754	-0.0407558	0.0407558	PRKACB	TSS1500	opensea
cg26060021	0.0340204	0.0802642	-0.0407194	0.0407194	MTOR	Body	opensea
cg17622401	1.58078e-06	5.2735e-05	-0.0406676	0.0406676	SHC2	Body	shore
cg09355865	0.00106966	0.00571312	-0.0406216	0.0406216	RHEB	Body	opensea
cg15943038	0.0041046	0.015984	0.0405825	0.0405825	INPP5A	Body	opensea
cg21626364	0.000312564	0.00232852	0.0405185	0.0405185	PRKAB1	Body	opensea
cg22679940	0.0517392	0.110041	0.0404889	0.0404889	HK1	Body	opensea
cg20778688	0.0436439	0.0970396	-0.040464	0.040464	ACACA	TSS1500	opensea
cg14656575	3.53111e-06	9.3082e-05	-0.0404258	0.0404258	PRKCZ	Body	shelf
cg16607349	0.000249858	0.00196271	-0.0403599	0.0403599	PIK3R1	Body	opensea
cg27500716	0.0219125	0.0570494	0.0403296	0.0403296	PIK3CB	TSS1500	opensea
cg27110374	4.7368e-05	0.000577153	-0.0403093	0.0403093	GRB2	Body	opensea
cg13253591	0.00110823	0.00587771	-0.0403058	0.0403058	PPP1CC	Body	opensea
cg12973665	0.0119448	0.0359524	-0.0401891	0.0401891	PRKCZ	5'UTR	opensea
cg20982537	0.00811746	0.0268121	-0.0401488	0.0401488	BRAF	Body	opensea
cg16350675	0.00369516	0.0148103	0.0401377	0.0401377	EIF4E2	Body	opensea
cg23045991	4.37045e-06	0.000106978	0.0401287	0.0401287	SH2B2	Body	shore
cg09304975	0.00285186	0.0122609	0.0401166	0.0401166	MAPK8	5'UTR	shore
cg20285026	0.00013895	0.00126977	-0.040109	0.040109	PRKCZ	Body	shore
cg00748716	0.0130889	0.0384277	-0.0400633	0.0400633	SH2B2	Body	shelf
cg25999891	0.0031025	0.0130453	-0.0400492	0.0400492	SREBF1	Body	shelf
cg15980735	0.429361	0.551332	-0.0400161	0.0400161	GCK	Body	opensea
cg26076905	0.0299697	0.0726132	0.0399725	0.0399725	PIK3R1	TSS200	opensea
cg19697150	0.0442949	0.0978916	-0.0399602	0.0399602	AKT2	5'UTR	opensea
cg09284125	5.9998e-05	0.000671157	0.0398841	0.0398841	INSR	Body	opensea
cg13467784	0.0100649	0.0316795	-0.0398796	0.0398796	ACACA	Body	opensea
cg18222865	0.00157601	0.00778732	-0.0398679	0.0398679	PDE3B	TSS1500	shore
cg09872392	0.063858	0.129296	-0.0398609	0.0398609	PHKG1	TSS1500	opensea
cg01040259	2.6027e-05	0.000376794	0.0397803	0.0397803	GRB2	3'UTR	opensea
cg10168009	0.0301578	0.0730045	0.0397521	0.0397521	PRKAB1	Body	shelf
cg15823067	0.0406785	0.0922258	-0.0397507	0.0397507	FBP2	TSS1500	opensea
cg16715632	0.194633	0.303417	-0.0397222	0.0397222	GYS1	Body	opensea
cg23181800	0.0938083	0.17365	-0.0396942	0.0396942	AKT3	Body	opensea
cg00175702	9.42341e-06	0.000188957	-0.0396881	0.0396881	PRKCZ	Body	opensea
cg23251761	0.0173537	0.0479587	-0.0396791	0.0396791	PIK3CD	5'UTR	island
cg13784312	0.0210765	0.0557196	0.0396787	0.0396787	RAPGEF1	Body	opensea
cg02248243	0.00104572	0.00561576	0.0396463	0.0396463	TSC2	Body	shore
cg12601506	0.00189662	0.00891867	-0.0396443	0.0396443	PRKCZ	Body	opensea
cg22091236	0.132091	0.225484	0.0394843	0.0394843	RPTOR	Body	shelf
cg12662327	1.02264e-05	0.000199311	-0.0394224	0.0394224	PRKAB1	Body	opensea
cg13102028	0.0210231	0.0556858	-0.039386	0.039386	RPTOR	Body	opensea
cg06056558	0.0496221	0.106489	-0.0392552	0.0392552	PRKAR1B	Body	shelf
cg16140342	0.00161439	0.00791746	-0.0392546	0.0392546	SHC3	TSS1500	shore
cg07964113	0.103234	0.186625	0.0392514	0.0392514	RPTOR	Body	island
cg13302927	0.0129469	0.0381244	-0.0392349	0.0392349	PRKAG2	Body	opensea
cg14654609	0.11413	0.201342	0.0392312	0.0392312	PRKAB1	Body	opensea
cg23209375	0.0347278	0.0815405	-0.0391915	0.0391915	PRKAR1B	5'UTR	shelf
cg05098037	4.02157e-08	4.16043e-06	-0.0391893	0.0391893	RPTOR	Body	opensea
cg25973481	3.42323e-07	1.80477e-05	-0.0391112	0.0391112	PRKCZ	5'UTR	opensea
cg05126370	0.000157426	0.0014104	-0.0390756	0.0390756	PRKAR1A	5'UTR	opensea
cg04666346	0.0169102	0.0470891	0.0390197	0.0390197	PRKAR1B	Body	shore
cg22250192	0.0170794	0.0473201	0.0390105	0.0390105	HK1	Body	opensea
cg11062167	8.97098e-05	0.00090253	0.0389993	0.0389993	RHOQ	Body	opensea
cg03731896	0.0387159	0.0886713	0.0389621	0.0389621	GYS1	Body	shore
cg14100005	0.486504	0.604314	0.0389287	0.0389287	PRKAG2	5'UTR	opensea
cg10264529	0.00720249	0.0245279	0.0389108	0.0389108	PCK2	TSS1500	shore
cg17844121	0.087478	0.164995	-0.038801	0.038801	PPP1R3A	3'UTR	opensea
cg21011025	0.0288392	0.0708129	-0.0387675	0.0387675	FOXO1	Body	opensea
cg22994495	4.91958e-05	0.00058512	0.0387632	0.0387632	RPTOR	Body	opensea
cg22562560	3.22488e-06	8.62539e-05	0.0387568	0.0387568	INPP5A	Body	shelf
cg25603883	0.0117491	0.035552	0.0387243	0.0387243	SHC1	5'UTR	shore
cg01283265	2.46471e-06	6.89489e-05	0.0387222	0.0387222	ACACB	Body	opensea
cg24091315	0.0169526	0.0471594	-0.0386437	0.0386437	SORBS1	Body	opensea
cg14989962	0.0109754	0.0337256	-0.0386329	0.0386329	PRKCZ	Body	shelf
cg23347273	3.08327e-07	1.69056e-05	0.0385957	0.0385957	LIPE	Body	island
cg05620928	0.000164312	0.00144721	-0.0385823	0.0385823	PRKCZ	5'UTR	opensea
cg27429745	0.00172232	0.00828376	0.0384687	0.0384687	EIF4E	Body	opensea
cg13396060	0.00267144	0.0116435	0.0384544	0.0384544	AKT3	Body	opensea
cg15499275	1.24657e-05	0.000226322	0.0384218	0.0384218	PIK3CD	Body	opensea
cg01023504	0.0870476	0.164467	-0.0382907	0.0382907	PRKAR1B	Body	shore
cg02241986	0.089036	0.167531	-0.0382605	0.0382605	CALML3	TSS1500	shore
cg11738543	0.0545192	0.114182	0.0382427	0.0382427	SOCS2	Body	island
cg21379113	0.0714512	0.140318	-0.0381697	0.0381697	AKT3	Body	opensea
cg27313926	1.05825e-07	8.05886e-06	0.0381539	0.0381539	PYGL	TSS1500	shore
cg09256126	0.0042593	0.0164232	0.0381076	0.0381076	PYGM	Body	opensea
cg16968681	9.07384e-05	0.00090954	0.0381056	0.0381056	SHC2	Body	shore
cg18018313	0.000368233	0.00261531	-0.0380844	0.0380844	IRS1	3'UTR	shore
cg18297027	0.0420569	0.0944494	0.0380663	0.0380663	RAPGEF1	TSS200	opensea
cg14675001	0.0389563	0.0891476	0.0380633	0.0380633	RAPGEF1	Body	opensea
cg04653988	2.51505e-05	0.000369044	-0.0380589	0.0380589	PRKAR1B	Body	opensea
cg11828732	6.61871e-06	0.000144583	-0.0380446	0.0380446	AKT2	5'UTR	opensea
cg04086928	2.91799e-05	0.000404024	0.0380119	0.0380119	RAPGEF1	Body	opensea
cg15577180	0.00224445	0.0101454	0.0380041	0.0380041	PRKAR1B	Body	island
cg13345558	0.0637054	0.129035	0.0379951	0.0379951	PRKAA1	Body	shore
cg08300037	0.182081	0.288791	0.0379016	0.0379016	PTPRF	5'UTR	shore
cg27065896	0.0703949	0.138591	-0.0378617	0.0378617	SORBS1	5'UTR	opensea
cg13577076	0.000117357	0.00110878	-0.0377996	0.0377996	PRKAR1B	5'UTR	shore
cg02255721	2.02106e-05	0.000313237	0.0377982	0.0377982	INPP5A	Body	island
cg02946878	0.0297894	0.0723363	-0.0377951	0.0377951	PPARGC1A	Body	opensea
cg00805619	0.00204024	0.00940054	-0.037745	0.037745	INPP5A	Body	opensea
cg10823980	0.000227105	0.00182583	0.0377066	0.0377066	RAPGEF1	TSS1500	opensea
cg09215353	0.00380101	0.0151226	0.0376837	0.0376837	FBP1	Body	opensea
cg08220332	0.0472899	0.10279	-0.0376571	0.0376571	SHC3	Body	opensea
cg24023352	0.0171431	0.0474487	0.0376439	0.0376439	MAPK8	5'UTR	opensea
cg21831512	0.018876	0.0509837	0.0376421	0.0376421	RPTOR	Body	shelf
cg08810238	0.000115108	0.00109572	-0.0375871	0.0375871	FLOT2	TSS1500	shore
cg10259889	0.0255475	0.064285	0.0375447	0.0375447	SH2B2	Body	island
cg02269453	0.223997	0.337564	-0.0375194	0.0375194	PPP1R3B	TSS1500	shore
cg12378436	1.02722e-06	3.86206e-05	0.037495	0.037495	INPP5A	Body	shelf
cg27613495	0.103004	0.186393	-0.0374834	0.0374834	PPP1R3B	3'UTR	opensea
cg05546878	6.15e-05	0.0006826	0.0374771	0.0374771	PRKAG3	TSS200	opensea
cg11298077	0.101246	0.184002	0.0374708	0.0374708	ACACA	Body	opensea
cg15357821	0.00104024	0.00561059	-0.0374279	0.0374279	HK3	Body	shelf
cg16362271	0.0306009	0.0738814	-0.037329	0.037329	TSC1	5'UTR	shelf
cg24872116	0.205857	0.315537	0.0373138	0.0373138	PTPRF	Body	opensea
cg02833614	0.163944	0.266896	0.037293	0.037293	INPP5A	Body	island
cg18638581	0.00368039	0.0147728	-0.0372766	0.0372766	HK2	TSS200	shore
cg06176608	0.0107562	0.0332073	-0.0372145	0.0372145	PRKCZ	Body	opensea
cg05242257	0.000298944	0.00224844	0.0371988	0.0371988	PDPK1	5'UTR	island
cg16323428	6.18443e-05	0.000683654	-0.037184	0.037184	INPP5A	Body	shelf
cg07530194	0.00156402	0.00774662	-0.0371815	0.0371815	RPTOR	Body	opensea
cg11319132	0.000143266	0.0013027	-0.0371684	0.0371684	MKNK2	Body	shore
cg01911440	0.145019	0.242421	-0.0370796	0.0370796	RPTOR	Body	shore
cg17831694	5.187e-05	0.000607699	-0.0370279	0.0370279	RPTOR	Body	opensea
cg21865687	0.0254182	0.0640478	-0.0370119	0.0370119	PDPK1	Body	opensea
cg26534468	1.77606e-05	0.000284777	0.0370001	0.0370001	ACACA	Body	opensea
cg16254756	0.00349721	0.0143098	0.0369949	0.0369949	SHC1	5'UTR	shelf
cg26819945	0.0556222	0.115987	-0.0369707	0.0369707	PIK3CD	5'UTR	shore
cg05326539	0.0902386	0.16894	-0.0369049	0.0369049	PRKAG2	Body	opensea
cg22994830	7.43331e-06	0.000159831	-0.0367372	0.0367372	PRKAR1B	Body	opensea
cg17750946	0.00606276	0.0215578	-0.0367297	0.0367297	INPP5A	Body	shelf
cg27096416	0.0657762	0.131769	-0.0366885	0.0366885	BRAF	Body	opensea
cg10884240	0.0010785	0.00573005	0.0366645	0.0366645	TSC2	Body	shelf
cg26446681	0.188639	0.296704	-0.0366624	0.0366624	MKNK1-AS1	Body	opensea
cg26804336	0.0510302	0.108829	0.0366551	0.0366551	PIK3R1	TSS1500	opensea
cg16858144	8.38139e-07	3.37906e-05	0.0366029	0.0366029	G3BP2	ExonBnd	opensea
cg06918623	4.8137e-08	4.71313e-06	0.0365907	0.0365907	PRKAG2	Body	opensea
cg19656469	9.8998e-05	0.00097103	0.0365634	0.0365634	ACACB	Body	opensea
cg14552860	0.0183137	0.0499323	-0.036556	0.036556	PYGM	ExonBnd	opensea
cg01931940	0.00101223	0.00552242	-0.0365456	0.0365456	AKT3	Body	opensea
cg19306937	0.206857	0.316638	0.0365	0.0365	AKT3	Body	opensea
cg06549607	0.0990082	0.18086	-0.0364896	0.0364896	IRS2	TSS1500	shore
cg27191520	0.0101857	0.0319314	-0.0364288	0.0364288	TSC2	Body	shore
cg20394487	0.17789	0.283704	-0.0364114	0.0364114	GSK3B	Body	opensea
cg09786634	0.00104398	0.00561576	-0.0363836	0.0363836	RPTOR	Body	shelf
cg06172191	0.0488264	0.105441	0.0363766	0.0363766	GYS2	Body	opensea
cg12639453	2.3041e-06	6.64914e-05	0.0363688	0.0363688	PRKCZ	TSS1500	shelf
cg00541718	0.00262694	0.0115136	0.0363589	0.0363589	PRKAR1B	Body	shore
cg05404847	0.068853	0.136536	-0.0363548	0.0363548	LIPE	1stExon	shelf
cg00846769	0.0442563	0.0978457	-0.0363322	0.0363322	INPP5A	Body	opensea
cg03556994	0.189262	0.297428	0.0363121	0.0363121	RHEB	Body	opensea
cg21297695	0.00134767	0.006861	0.0362654	0.0362654	PRKAG2	Body	opensea
cg11624078	0.0253398	0.0639231	-0.036264	0.036264	INPP5A	Body	island
cg14651891	0.0254811	0.0641474	-0.03625	0.03625	SOS2	Body	opensea
cg00321603	0.248016	0.36331	-0.0362134	0.0362134	MAPK8	5'UTR	opensea
cg09175325	0.00550981	0.0201	0.0361793	0.0361793	RPTOR	Body	shore
cg06887089	0.193777	0.302528	0.0361574	0.0361574	RPTOR	Body	shore
cg14632054	0.140735	0.236702	-0.0359746	0.0359746	IRS1	1stExon	shelf
cg02277438	0.0523966	0.111052	-0.0359679	0.0359679	PRKACA	TSS1500	shelf
cg13963807	0.1103	0.196483	-0.0359635	0.0359635	PPP1CA	3'UTR	shore
cg23112188	0.0162186	0.0454868	0.0359342	0.0359342	PCK2	TSS1500	shore
cg26173417	1.80894e-09	7.62954e-07	-0.0359175	0.0359175	PRKAR1B	Body	shelf
cg19701879	0.117852	0.206581	-0.0359158	0.0359158	PPARGC1A	Body	opensea
cg14553895	0.0666244	0.132934	0.0359041	0.0359041	PIK3CA	5'UTR	opensea
cg09625024	0.0367125	0.085114	0.0358856	0.0358856	INPP5A	Body	shelf
cg11639651	0.0480582	0.104069	-0.0358576	0.0358576	HKDC1	TSS1500	opensea
cg27349581	0.0156389	0.0443342	-0.0358508	0.0358508	HRAS	Body	shore
cg26426564	0.0109794	0.0337256	0.0357964	0.0357964	INPP5A	Body	opensea
cg01140244	0.00277369	0.0119844	-0.0357567	0.0357567	INPP5A	Body	opensea
cg12313886	0.0131731	0.0385841	0.0357344	0.0357344	INPP5A	3'UTR	shore
cg07140325	1.3182e-06	4.60363e-05	0.0357223	0.0357223	ACACA	5'UTR	opensea
cg07834934	1.65308e-05	0.000272187	-0.0356935	0.0356935	ACACA	Body	opensea
cg21271945	0.032937	0.0782468	0.0356924	0.0356924	PRKCZ	Body	shelf
cg18426551	0.00632777	0.0222735	0.0356845	0.0356845	G6PC3	TSS1500	shore
cg01462184	0.0113132	0.0345187	0.0356659	0.0356659	PRKAR1B	Body	shelf
cg05806645	0.0280991	0.0694301	0.0356651	0.0356651	PPP1R3B	TSS1500	island
cg12095975	0.0145846	0.041824	-0.0356138	0.0356138	SORBS1	5'UTR	opensea
cg12867312	0.0567102	0.117736	-0.0355886	0.0355886	BRAF	Body	opensea
cg19870743	0.00132836	0.00679422	-0.0355624	0.0355624	PRKCZ	Body	opensea
cg22356324	0.00639632	0.0224526	0.0355316	0.0355316	HK1	Body	island
cg01331992	0.0642892	0.129772	0.0354957	0.0354957	RPS6	Body	shore
cg22255288	0.0792869	0.15211	0.035495	0.035495	RPTOR	Body	shelf
cg06212213	0.00341625	0.0140943	0.0354844	0.0354844	PRKAR1B	Body	island
cg04963607	1.23378e-09	6.14983e-07	0.0354381	0.0354381	PRKAR1B	Body	shore
cg12919527	0.130539	0.223322	0.0354293	0.0354293	MKNK1	5'UTR	opensea
cg10040669	0.0118827	0.0358967	-0.0354004	0.0354004	PPP1R3B	TSS1500	shore
cg06146943	1.62449e-07	1.09964e-05	-0.0353782	0.0353782	RPTOR	TSS1500	shore
cg07222721	0.0437725	0.097177	-0.0353699	0.0353699	PRKCZ	Body	opensea
cg12713909	0.111994	0.198595	-0.0352889	0.0352889	PRKCZ	5'UTR	shore
cg18460176	0.00898718	0.0290376	-0.0352776	0.0352776	FLOT2	Body	opensea
cg17126250	0.000515336	0.00338394	-0.0352725	0.0352725	PRKAR2B	Body	opensea
cg17859552	0.00011162	0.00106995	0.0352593	0.0352593	INPP5A	Body	shore
cg24716167	2.93827e-06	8.01518e-05	0.0352468	0.0352468	INPP5A	Body	opensea
cg15725046	0.000356047	0.00254525	0.0352421	0.0352421	MTOR	Body	opensea
cg12045294	0.00360571	0.0145671	0.0352406	0.0352406	RPTOR	TSS200	shore
cg11758127	0.000572357	0.00363687	0.0352273	0.0352273	PRKCZ	Body	shelf
cg25920520	0.000113016	0.00107956	0.0351947	0.0351947	G6PC3	TSS1500	shore
cg03377392	0.000606267	0.00380421	0.0351651	0.0351651	PRKCZ	Body	shelf
cg23347911	0.0036079	0.0145671	-0.035143	0.035143	RPS6KB2	TSS1500	shore
cg11692610	0.000491278	0.00325717	-0.0351379	0.0351379	EIF4E1B	5'UTR	opensea
cg26046773	2.26462e-08	2.69933e-06	0.0351368	0.0351368	PPP1R3E	3'UTR	shore
cg12350393	0.17675	0.282308	0.0351349	0.0351349	GCK	Body	shore
cg03743087	0.0311984	0.0748954	-0.0350841	0.0350841	GSK3B	Body	opensea
cg17593625	0.000473149	0.00316762	-0.0350829	0.0350829	PRKAR1B	TSS1500	shore
cg12718519	0.00237095	0.0106208	0.0350657	0.0350657	PRKCZ	5'UTR	opensea
cg06878741	0.0265563	0.0664709	0.035045	0.035045	PRKAR1B	Body	island
cg21507958	3.90475e-07	1.9642e-05	-0.0350449	0.0350449	RPTOR	Body	shore
cg10345613	0.00138669	0.00701412	0.0350059	0.0350059	RAF1	Body	opensea
cg07375276	0.0645645	0.130198	-0.0349696	0.0349696	AKT2	ExonBnd	opensea
cg05371663	3.71936e-05	0.000492496	0.0349227	0.0349227	INPPL1	Body	opensea
cg18294563	0.000980513	0.0053986	0.0348849	0.0348849	SOS2	Body	opensea
cg14542226	0.129674	0.222535	-0.0348523	0.0348523	PRKAR2B	Body	opensea
cg27342480	0.331281	0.45399	0.0348511	0.0348511	PYGB	Body	opensea
cg24029352	0.000922126	0.00516975	-0.0348494	0.0348494	FLOT2	Body	shore
cg19906777	0.067886	0.13496	-0.0348431	0.0348431	PRKCZ	Body	shore
cg26247505	0.000187506	0.00159133	0.0347667	0.0347667	PTPN1	5'UTR	opensea
cg21681030	0.00778739	0.0259722	-0.034757	0.034757	RHOQ	Body	opensea
cg11422234	0.143398	0.240297	0.0347189	0.0347189	EIF4E1B	5'UTR	opensea
cg18274125	0.432553	0.553573	-0.0346528	0.0346528	MAPK10	Body	opensea
cg02360676	0.000631414	0.00391634	0.0346233	0.0346233	SHC2	3'UTR	shore
cg14591390	0.245632	0.360783	0.0346005	0.0346005	PPARGC1A	Body	opensea
cg16880396	0.20949	0.319776	0.0345875	0.0345875	SH2B2	TSS200	shore
cg03646131	0.0266989	0.0667228	0.0345594	0.0345594	PTPN1	5'UTR	opensea
cg24797508	0.00317339	0.0132923	-0.0343911	0.0343911	PIK3R1	Body	shore
cg17426766	0.0437657	0.097177	-0.034367	0.034367	PRKCZ	5'UTR	island
cg01156012	0.00740847	0.0249689	-0.034367	0.034367	IRS2	Body	opensea
cg21879029	0.0742304	0.144636	0.0343359	0.0343359	RPTOR	Body	island
cg02605429	2.02236e-05	0.000313237	0.0343351	0.0343351	GCK	Body	opensea
cg13658000	0.0274966	0.0683736	-0.0343139	0.0343139	PCK2	Body	opensea
cg13763181	0.00170874	0.00823287	0.034294	0.034294	HK1	Body	opensea
cg18224819	1.67002e-08	2.43337e-06	-0.0342209	0.0342209	RPTOR	Body	shore
cg05953751	0.0029274	0.0124716	0.034215	0.034215	FASN	Body	island
cg12980774	8.01031e-08	6.65463e-06	0.0342127	0.0342127	GSK3B	Body	opensea
cg01012966	0.0164237	0.0458976	-0.034143	0.034143	MAPK10	5'UTR	opensea
cg26461009	0.255776	0.372257	-0.0341204	0.0341204	PRKAR1B	Body	shore
cg09371063	0.121867	0.212058	-0.0340836	0.0340836	ACACA	5'UTR	island
cg25673241	0.099525	0.181415	0.034047	0.034047	RPTOR	Body	opensea
cg03193551	0.0357324	0.0832996	-0.0339865	0.0339865	PRKAG2	Body	opensea
cg04630250	0.0115486	0.0350226	-0.0339594	0.0339594	PTPRF	Body	opensea
cg05287944	0.0111008	0.0339842	-0.0339443	0.0339443	PRKACB	Body	opensea
cg05337636	0.0690444	0.136619	-0.0339353	0.0339353	RPTOR	Body	shore
cg22208713	0.0600172	0.123199	-0.0339152	0.0339152	GCK	Body	opensea
cg23017701	0.190592	0.299089	0.0338997	0.0338997	SHC4	Body	opensea
cg25455542	0.000725554	0.00434777	0.0338821	0.0338821	INPP5A	Body	shelf
cg14350544	0.0287103	0.0705595	-0.0338759	0.0338759	FBP2	Body	opensea
cg19580166	0.00835996	0.0274313	-0.0338757	0.0338757	PRKACB	TSS1500	opensea
cg24918570	0.06981	0.137736	-0.0338675	0.0338675	CALM1	3'UTR	opensea
cg13826384	0.0138102	0.0401278	0.0338586	0.0338586	INPP5A	Body	opensea
cg08772854	0.0282453	0.0696353	0.0338044	0.0338044	INPP5A	Body	opensea
cg03398951	0.618018	0.720671	0.033785	0.033785	RPTOR	Body	island
cg01897601	0.000380595	0.00267538	-0.0337797	0.0337797	CALM1	3'UTR	opensea
cg02790090	0.0108818	0.0335008	0.0337726	0.0337726	PPP1CC	Body	opensea
cg03591419	6.11746e-06	0.000138033	0.0337642	0.0337642	SOCS4	5'UTR	opensea
cg25815024	9.87303e-06	0.000194726	0.033756	0.033756	PRKAG3	TSS200	opensea
cg11776825	0.255508	0.372198	0.0337343	0.0337343	RPTOR	Body	shore
cg21341586	0.000147367	0.00133335	-0.0337317	0.0337317	EIF4E	5'UTR	shore
cg09052355	0.0506882	0.108352	0.0337095	0.0337095	FLOT2	Body	opensea
cg04864054	0.0957731	0.176453	-0.0336963	0.0336963	HRAS	Body	shore
cg14900579	1.8991e-08	2.50433e-06	-0.0336676	0.0336676	INSR	TSS200	island
cg01449266	0.000672623	0.00410373	-0.0335963	0.0335963	PRKCZ	Body	opensea
cg09768970	0.179174	0.285252	-0.0335895	0.0335895	PRKAR1B	Body	island
cg16901969	1.80426e-06	5.71837e-05	-0.0335662	0.0335662	GCK	Body	opensea
cg01871121	6.00534e-07	2.57244e-05	-0.0335571	0.0335571	BAD	Body	shelf
cg07684553	0.000702282	0.00425013	-0.0335491	0.0335491	PRKCZ	5'UTR	opensea
cg07095969	0.00150839	0.00752548	-0.0335262	0.0335262	PIK3R1	Body	opensea
cg18439339	0.052724	0.111401	0.033499	0.033499	PRKAG2	Body	opensea
cg22642898	0.136862	0.23203	-0.0334671	0.0334671	ACACA	5'UTR	opensea
cg06220235	0.106403	0.191031	0.0334575	0.0334575	SOCS1	Body	island
cg11768925	0.055058	0.115135	-0.0333958	0.0333958	PRKACB	TSS1500	opensea
cg00457494	0.0483167	0.104588	-0.033349	0.033349	PTPRF	Body	shelf
cg02499121	1.04889e-05	0.000200343	0.0333465	0.0333465	PRKAR1B	Body	opensea
cg01082057	1.45082e-07	1.0231e-05	-0.0333206	0.0333206	PRKAR1B	Body	shore
cg07151737	0.132553	0.225992	0.0333044	0.0333044	FOXO1	Body	opensea
cg07872489	2.45999e-06	6.89489e-05	-0.0332511	0.0332511	PIK3R1	Body	shore
cg03875091	0.298355	0.41935	-0.0332442	0.0332442	INPP5A	Body	shore
cg13655250	0.479782	0.59878	-0.0332181	0.0332181	RAPGEF1	Body	opensea
cg14508295	0.0192085	0.0516528	0.0332143	0.0332143	PPP1CA	Body	shore
cg04970129	0.00345766	0.0142223	-0.0331815	0.0331815	GSK3B	Body	opensea
cg07954487	0.0127467	0.0376563	0.0331803	0.0331803	RPTOR	Body	shore
cg16735509	0.055704	0.116043	0.0331277	0.0331277	PRKCZ	Body	shelf
cg14384714	0.135383	0.230101	0.0330943	0.0330943	PYGB	TSS1500	shore
cg19127835	5.05653e-05	0.000594956	-0.0330554	0.0330554	HK1	Body	shelf
cg10122855	0.129728	0.22254	0.0330274	0.0330274	PDE3B	Body	opensea
cg23192901	0.212902	0.324442	-0.0329582	0.0329582	MAPK1	Body	opensea
cg10866307	1.66198e-08	2.43337e-06	-0.0329204	0.0329204	CBLB	Body	opensea
cg06788249	0.0110146	0.0337957	-0.0328395	0.0328395	INPP5A	Body	island
cg03971523	0.00693835	0.0239114	-0.0328371	0.0328371	PDPK1	Body	opensea
cg16874617	7.61719e-05	0.000803174	-0.032834	0.032834	HKDC1	Body	island
cg11093640	2.28747e-07	1.40924e-05	-0.0328008	0.0328008	HK3	3'UTR	shelf
cg06934468	0.00138136	0.007	0.0327543	0.0327543	AKT1	Body	shelf
cg03947020	0.0437766	0.097177	-0.0327275	0.0327275	HK1	5'UTR	opensea
cg19744478	0.052396	0.111052	0.0326906	0.0326906	HK1	Body	opensea
cg14406501	0.000189281	0.00159522	-0.0326628	0.0326628	RPTOR	TSS1500	shore
cg15815515	0.0840679	0.159698	0.0326524	0.0326524	RAPGEF1	TSS1500	opensea
cg17748900	0.0285449	0.0701845	-0.0326242	0.0326242	PRKCZ	5'UTR	shore
cg24385596	0.159175	0.260758	0.0326014	0.0326014	GCK	1stExon	opensea
cg10248131	0.000161324	0.00143129	0.0325434	0.0325434	SHC4	Body	opensea
cg04748213	0.000173553	0.00150807	0.0324839	0.0324839	PRKAG2	Body	opensea
cg09244305	0.102267	0.185242	-0.0324577	0.0324577	TSC1	Body	opensea
cg01747035	0.00648095	0.0226771	-0.0324501	0.0324501	SORBS1	5'UTR	opensea
cg09864961	2.57773e-05	0.000374899	0.0323523	0.0323523	INS	TSS1500	opensea
cg18760837	0.0242007	0.0618901	0.0323285	0.0323285	FLOT1	Body	opensea
cg20328379	0.000964865	0.00536004	-0.0322672	0.0322672	PRKCZ	5'UTR	shelf
cg16565901	0.00771157	0.0257663	-0.0322659	0.0322659	RPTOR	Body	opensea
cg06516482	0.0196638	0.0526705	-0.0322573	0.0322573	PRKAG2	Body	opensea
cg02587648	0.00238109	0.0106402	0.0322493	0.0322493	PRKCZ	Body	shore
cg10485624	7.75892e-05	0.000810327	0.032241	0.032241	PIK3R3	Body	opensea
cg02421553	0.00372843	0.0149001	-0.0322121	0.0322121	PDPK1	Body	opensea
cg19359099	1.37099e-06	4.72777e-05	-0.0321734	0.0321734	HK2	5'UTR	shore
cg02254800	0.000106239	0.00103029	0.0321619	0.0321619	RPTOR	Body	shore
cg17386689	0.245181	0.36041	0.0321273	0.0321273	MAP2K1	Body	opensea
cg19257562	7.16792e-08	6.39044e-06	-0.0321197	0.0321197	PRKCZ	5'UTR	shelf
cg03356474	0.0139682	0.0403942	0.0320921	0.0320921	PTPRF	TSS1500	shore
cg04009117	0.00114627	0.00601436	-0.0320616	0.0320616	RAF1	5'UTR	opensea
cg06459662	0.00225254	0.0101735	-0.0320544	0.0320544	PHKB	Body	shelf
cg14871290	0.140231	0.236216	-0.0320472	0.0320472	FOXO1	Body	opensea
cg01357713	0.0102821	0.0320764	0.0320239	0.0320239	PRKAG3	TSS200	opensea
cg18648066	0.00320753	0.0133537	-0.0320198	0.0320198	RPTOR	Body	island
cg05134133	0.176539	0.282308	-0.031987	0.031987	ACACA	TSS1500	opensea
cg15666099	9.13996e-05	0.000914497	0.0319519	0.0319519	AKT1	ExonBnd	shore
cg10664582	0.126919	0.21918	0.0319512	0.0319512	IRS2	Body	opensea
cg23803603	1.89833e-05	0.000299096	0.0319156	0.0319156	PRKCZ	5'UTR	opensea
cg06164957	0.261148	0.377956	-0.0319131	0.0319131	PRKCZ	1stExon	island
cg22812840	0.234163	0.348701	0.0318981	0.0318981	HK1	Body	opensea
cg03181644	0.0111234	0.0339965	-0.0318913	0.0318913	EXOC7	Body	opensea
cg01239651	0.0106461	0.0329231	-0.0318465	0.0318465	PIK3R1	Body	shore
cg04815835	0.0144729	0.0415689	-0.0318452	0.0318452	PYGM	Body	opensea
cg14931062	0.0525006	0.111143	-0.0318128	0.0318128	IRS1	3'UTR	shore
cg21137823	0.00872294	0.0283508	-0.0318081	0.0318081	PRKCZ	TSS1500	island
cg12552744	0.117207	0.205713	-0.0318066	0.0318066	IKBKB	TSS1500	shore
cg20534694	7.69341e-05	0.000808102	-0.0317886	0.0317886	PRKAG2	Body	opensea
cg26637628	0.236038	0.350446	0.0317786	0.0317786	INPP5A	Body	shelf
cg16746353	0.0176427	0.0485131	0.0317256	0.0317256	MAPK1	Body	opensea
cg09649714	0.00281371	0.0121381	-0.0317061	0.0317061	MAPK10	5'UTR	opensea
cg01370013	1.72129e-05	0.00028073	-0.0316899	0.0316899	PRKAG2	Body	opensea
cg12184450	0.0246986	0.062812	-0.0316648	0.0316648	ACACA	Body	opensea
cg23817347	0.0244015	0.062212	0.0316474	0.0316474	PTPN1	TSS200	island
cg10874300	0.00179505	0.00857338	0.0315909	0.0315909	PIK3R1	Body	shelf
cg26717964	4.97144e-05	0.000590009	0.0315879	0.0315879	RAPGEF1	TSS1500	opensea
cg22888023	0.42896	0.551332	-0.0315744	0.0315744	RPTOR	Body	shore
cg08234897	0.011379	0.03463	0.0315544	0.0315544	RHEB	TSS200	island
cg04971812	0.00274283	0.0118979	0.0315482	0.0315482	AKT1	3'UTR	shelf
cg17814717	0.0346434	0.0813838	-0.0315099	0.0315099	PRKAG2	TSS200	opensea
cg26472690	0.00158268	0.00780378	0.0314984	0.0314984	INPP5A	Body	shelf
cg05804899	0.0798399	0.152893	0.0314713	0.0314713	SHC3	Body	opensea
cg18238973	4.59545e-05	0.000568778	-0.0314209	0.0314209	MAPK10	Body	opensea
cg07565499	0.411012	0.535673	-0.031371	0.031371	PTPRF	Body	opensea
cg16797824	1.34904e-06	4.68151e-05	0.0313207	0.0313207	PIK3R1	Body	opensea
cg03567939	0.127258	0.219588	0.0312566	0.0312566	PRKAG2	5'UTR	opensea
cg08058824	0.225752	0.338936	0.0312318	0.0312318	RAPGEF1	Body	opensea
cg24465323	0.00016388	0.00144694	0.0311925	0.0311925	PRKACA	Body	opensea
cg08872248	0.000453396	0.00307289	-0.0311886	0.0311886	TSC2	Body	shelf
cg03755131	0.0558322	0.116266	-0.0311773	0.0311773	INPP5A	Body	opensea
cg21987356	0.0933544	0.173113	-0.0311713	0.0311713	GCK	Body	opensea
cg23185029	0.00921843	0.0296276	-0.0311628	0.0311628	PRKAG2	TSS1500	opensea
cg07812841	1.82588e-07	1.1968e-05	0.0311525	0.0311525	ACACA	Body	opensea
cg26560981	0.0648922	0.130522	-0.0311243	0.0311243	MAPK10	Body	opensea
cg25541887	0.103906	0.187591	-0.0311185	0.0311185	SHC3	Body	opensea
cg14564332	6.7416e-05	0.000733416	-0.0311077	0.0311077	TSC1	Body	opensea
cg23075968	1.14741e-06	4.19415e-05	0.0310975	0.0310975	INSR	Body	shore
cg04375036	0.223754	0.337415	0.0310766	0.0310766	PPP1CC	TSS1500	shore
cg09579928	0.180135	0.2867	-0.0310561	0.0310561	EIF4EBP1	Body	opensea
cg23513444	0.0672654	0.13392	0.0310538	0.0310538	PIK3R1	Body	shelf
cg17512993	0.000949871	0.00529821	0.0310321	0.0310321	FASN	Body	shore
cg10227363	0.0782314	0.150612	0.0310087	0.0310087	PTPN1	5'UTR	opensea
cg04018991	2.25849e-05	0.00034208	-0.0309472	0.0309472	FLOT1	TSS1500	island
cg22906955	0.00029945	0.00224916	0.0309453	0.0309453	GRB2	Body	opensea
cg07723345	0.000106445	0.00103029	0.0309387	0.0309387	AKT3	Body	opensea
cg19759051	0.00557354	0.0202785	0.0308836	0.0308836	PRKCZ	Body	opensea
cg14725190	0.11184	0.198518	-0.0308678	0.0308678	RAPGEF1	3'UTR	opensea
cg15837086	7.87086e-06	0.000165984	-0.030822	0.030822	PIK3R3	3'UTR	opensea
cg11023901	0.187315	0.295468	0.0308176	0.0308176	BRAF	TSS1500	shore
cg11904388	0.0174281	0.0480676	-0.030794	0.030794	MAPK9	5'UTR	shore
cg16269144	0.0149871	0.0427102	-0.0307845	0.0307845	PRKCZ	Body	shore
cg06160239	0.0183075	0.0499323	-0.030764	0.030764	RAPGEF1	Body	opensea
cg26221719	8.97401e-06	0.000182916	-0.030714	0.030714	PRKCZ	Body	opensea
cg06829901	0.0211174	0.0557197	0.0306921	0.0306921	AKT1	Body	opensea
cg09958483	0.00258377	0.0113516	0.0306854	0.0306854	PYGM	1stExon	opensea
cg24577455	2.64202e-05	0.000380215	-0.0306731	0.0306731	PRKCZ	5'UTR	shelf
cg03900355	0.0208671	0.0553527	-0.0306654	0.0306654	PYGM	Body	opensea
cg02283735	0.106297	0.190903	0.0306268	0.0306268	PTPRF	Body	opensea
cg05004652	0.0839262	0.159563	0.0305994	0.0305994	IKBKB	Body	opensea
cg12280622	0.00111577	0.00589381	-0.0305636	0.0305636	INSR	TSS1500	shore
cg04388278	0.00274101	0.0118979	-0.0305585	0.0305585	PRKAR2B	Body	opensea
cg22850007	0.0015213	0.00756925	0.0305446	0.0305446	PIK3R3	Body	opensea
cg26828664	0.191496	0.29965	-0.0305263	0.0305263	PRKAR1B	Body	opensea
cg16838972	0.149091	0.247417	-0.0304889	0.0304889	CRK	Body	opensea
cg11406862	0.00626926	0.0221199	0.0304689	0.0304689	INPP5A	Body	opensea
cg12984893	0.0788544	0.151598	-0.0304616	0.0304616	INPP5A	Body	shelf
cg05253159	0.146666	0.244577	0.0304119	0.0304119	SH2B2	Body	shore
cg15950100	0.170209	0.274406	0.0303547	0.0303547	AKT3	Body	opensea
cg16223436	1.91949e-05	0.000300702	-0.0303322	0.0303322	SORBS1	Body	opensea
cg18241597	0.0542898	0.113919	-0.0303252	0.0303252	SHC1	Body	shelf
cg20095237	1.70033e-05	0.00027911	0.0302972	0.0302972	PRKAR1B	Body	shore
cg23967442	0.00601851	0.021484	0.0302247	0.0302247	INPP5A	Body	shelf
cg19824710	0.0372031	0.0861422	0.0302219	0.0302219	PTPRF	TSS1500	shore
cg18965980	5.62298e-05	0.000643376	0.0301858	0.0301858	RPTOR	Body	shore
cg16536855	0.0859002	0.162691	0.030167	0.030167	HK1	5'UTR	opensea
cg27303655	0.000624918	0.00388483	0.0301428	0.0301428	PRKAG2	Body	opensea
cg04016443	0.0195807	0.0524992	0.0301293	0.0301293	RAF1	5'UTR	opensea
cg12853418	0.00533072	0.0196516	0.0300825	0.0300825	SORBS1	Body	opensea
cg19121439	2.66814e-05	0.00038197	-0.0300226	0.0300226	AKT3	Body	opensea
cg19114154	2.02769e-06	6.1087e-05	0.0299513	0.0299513	RAPGEF1	Body	opensea
cg02004258	0.00695013	0.0239369	0.0299245	0.0299245	PRKAG3	Body	opensea
cg08823780	0.00134195	0.00685094	0.0298985	0.0298985	PRKACB	Body	opensea
cg01214711	0.00150808	0.00752548	0.0298615	0.0298615	INPP5A	Body	shore
cg26828494	0.251574	0.367051	-0.0298491	0.0298491	PPP1CB	Body	opensea
cg25701517	0.0394172	0.0899394	-0.0297843	0.0297843	RAF1	5'UTR	opensea
cg13994842	0.000494457	0.00327428	0.0297825	0.0297825	PRKAG2	TSS200	opensea
cg02156924	0.0470409	0.102392	-0.0297696	0.0297696	MAPK8	5'UTR	opensea
cg03209472	0.00164869	0.00804708	0.0297478	0.0297478	TSC2	Body	shelf
cg26203136	0.0102846	0.0320764	-0.0297239	0.0297239	PRKAR1B	Body	opensea
cg19828062	0.243608	0.358385	-0.029708	0.029708	FOXO1	Body	opensea
cg22983290	0.0353493	0.0827126	0.0296963	0.0296963	INPP5A	Body	shore
cg26409675	0.000426074	0.00293488	-0.0296666	0.0296666	MAPK10	TSS200	opensea
cg20163038	0.0398647	0.0908095	-0.0296515	0.0296515	INSR	Body	shelf
cg11887214	0.00101327	0.0055226	0.0295397	0.0295397	PYGM	1stExon	opensea
cg09120603	0.014036	0.040569	-0.0295227	0.0295227	AKT2	5'UTR	opensea
cg11740348	0.361979	0.486931	-0.0295213	0.0295213	INPP5A	Body	opensea
cg11194698	0.00493486	0.0185074	0.0294683	0.0294683	GCK	Body	island
cg09517926	0.0019282	0.00904389	-0.0294624	0.0294624	PRKAG2	Body	opensea
cg14573876	0.426724	0.54949	0.0294609	0.0294609	MAP2K2	Body	shelf
cg19649172	0.0547883	0.114636	-0.0294552	0.0294552	INPP5A	Body	opensea
cg13810766	0.000116873	0.00110676	-0.0294251	0.0294251	PRKAG2	Body	opensea
cg15703790	0.0798625	0.152893	-0.0294248	0.0294248	PRKCZ	Body	shelf
cg09746086	0.0576634	0.119215	0.0294162	0.0294162	INPP5A	Body	opensea
cg11736940	0.00833387	0.0273784	-0.0293987	0.0293987	PKLR	Body	island
cg16570917	0.00268327	0.0116857	0.0293973	0.0293973	PTPRF	TSS1500	shore
cg25164204	0.152785	0.252438	-0.0293535	0.0293535	AKT2	5'UTR	opensea
cg21761853	0.0359851	0.0838017	0.0293411	0.0293411	FLOT1	Body	opensea
cg20398120	0.00748477	0.0251773	0.0293323	0.0293323	PRKAG3	TSS200	opensea
cg01181416	0.170459	0.274648	0.0293295	0.0293295	INS	1stExon	opensea
cg15654792	9.70662e-05	0.000957219	-0.02932	0.02932	PTPRF	3'UTR	opensea
cg20253700	0.0184721	0.0502095	0.0293078	0.0293078	TSC2	Body	shore
cg26771559	7.14695e-05	0.000766864	-0.029299	0.029299	MAP2K2	Body	island
cg10691109	1.6648e-07	1.11318e-05	0.0292923	0.0292923	PRKAR2B	Body	opensea
cg13774825	0.126625	0.21874	0.0292658	0.0292658	AKT1	TSS1500	shore
cg20221930	0.00553274	0.0201568	0.0292455	0.0292455	RAPGEF1	Body	opensea
cg15470431	0.0546639	0.114442	-0.0292304	0.0292304	PDPK1	Body	opensea
cg11044316	0.0303935	0.0734777	-0.0292243	0.0292243	SHC3	Body	opensea
cg19299096	0.440695	0.561546	0.0292223	0.0292223	PRKCI	Body	opensea
cg00472879	0.00157549	0.00778732	-0.0291878	0.0291878	SORBS1	Body	opensea
cg06921282	0.0122778	0.0366863	-0.0291847	0.0291847	HRAS	TSS1500	island
cg09843855	0.00550772	0.0201	0.0291599	0.0291599	INPP5A	Body	opensea
cg02587534	0.0533812	0.112419	0.0290731	0.0290731	PRKACB	Body	opensea
cg11835462	2.52118e-05	0.000369044	0.0290616	0.0290616	EIF4E2	Body	opensea
cg25976434	0.000449165	0.00306696	-0.0289878	0.0289878	PRKCZ	Body	shelf
cg13372675	0.111948	0.19858	-0.0289006	0.0289006	PRKAR2A-AS1	Body	shore
cg17357149	0.154172	0.254156	0.0288916	0.0288916	PHKG2	Body	shore
cg14014731	0.200501	0.310103	0.0288795	0.0288795	RPS6	Body	shore
cg17632777	0.00110955	0.00587794	0.0288788	0.0288788	GRB2	TSS1500	shore
cg09796270	1.05597e-05	0.000200343	-0.0288758	0.0288758	SREBF1	Body	opensea
cg17497824	0.0165744	0.0462951	-0.0288722	0.0288722	PRKCZ	Body	opensea
cg14656259	2.57564e-07	1.48655e-05	-0.0288553	0.0288553	PRKAR1B	Body	opensea
cg12527684	0.000257795	0.0020078	-0.0288544	0.0288544	EIF4E	5'UTR	shore
cg11047325	0.013873	0.0402463	0.0288543	0.0288543	SOCS3	Body	island
cg15819352	0.000116811	0.00110676	0.0288442	0.0288442	CALML6	TSS1500	opensea
cg16200325	0.19144	0.299648	0.0288252	0.0288252	INPP5A	Body	opensea
cg10315903	0.267004	0.384045	-0.0287976	0.0287976	MTOR	TSS1500	shore
cg23564931	0.289154	0.40925	0.0287758	0.0287758	PRKAR1A	5'UTR	shelf
cg16784970	0.0422771	0.0947692	0.0287192	0.0287192	TSC2	Body	shelf
cg18305652	0.247196	0.3624	-0.0287157	0.0287157	INPP5A	Body	island
cg24180621	0.00356846	0.0144825	-0.0287085	0.0287085	RPTOR	Body	shelf
cg24329497	0.020095	0.0536681	-0.0287057	0.0287057	PIK3R3	Body	opensea
cg13558627	1.30233e-06	4.57736e-05	0.0286756	0.0286756	PRKAR1B	Body	opensea
cg15888019	0.0030566	0.0128819	-0.0286718	0.0286718	MAPK10	5'UTR	opensea
cg27126659	0.0326118	0.0776088	-0.0286576	0.0286576	IRS1	1stExon	shelf
cg12588208	7.34265e-08	6.39044e-06	0.0286351	0.0286351	GSK3B	Body	opensea
cg00197028	0.00252047	0.0111181	-0.0286232	0.0286232	PTPRF	Body	shore
cg13512333	0.000651196	0.0040073	0.0286179	0.0286179	PDE3B	Body	opensea
cg20341632	0.00632905	0.0222735	0.0286171	0.0286171	SH2B2	Body	shore
cg13992856	0.0492379	0.105996	-0.0285963	0.0285963	FLOT2	Body	island
cg23931853	0.0708645	0.139365	-0.0285719	0.0285719	PRKAG2	Body	opensea
cg25990678	0.000348577	0.00251623	-0.0285341	0.0285341	MAP2K2	Body	island
cg14003121	0.191363	0.299648	0.028532	0.028532	CALM1	3'UTR	opensea
cg26210449	0.0336554	0.0796429	0.0285269	0.0285269	MAPK9	TSS1500	shore
cg17025688	0.00662516	0.023064	0.0285082	0.0285082	PRKCZ	Body	opensea
cg25579027	0.22889	0.342605	-0.0284659	0.0284659	CALML3-AS1	Body	opensea
cg07601847	6.42602e-05	0.000704677	0.0284423	0.0284423	RPTOR	Body	opensea
cg07166896	0.0415754	0.0937712	0.0284369	0.0284369	INPP5A	Body	opensea
cg02022322	0.062605	0.127182	-0.0284368	0.0284368	ACACB	TSS1500	opensea
cg21625552	4.04628e-07	2.01689e-05	0.0284357	0.0284357	ACACA	5'UTR	opensea
cg04779726	3.95337e-05	0.000514878	0.0284118	0.0284118	PRKAG2	5'UTR	opensea
cg08651178	0.00016325	0.00144371	-0.0284062	0.0284062	PRKCZ	TSS1500	shelf
cg16016792	0.0555229	0.115886	-0.0283963	0.0283963	SHC3	Body	opensea
cg11541120	0.0441221	0.0976792	-0.0283459	0.0283459	SH2B2	Body	shelf
cg05798318	0.000470912	0.00316035	-0.0283216	0.0283216	HRAS	TSS1500	island
cg27364433	0.0940423	0.174024	0.0282841	0.0282841	SORBS1	5'UTR	opensea
cg15818577	0.0264781	0.0663525	0.0282827	0.0282827	FASN	Body	shore
cg17283083	0.00182439	0.00867576	-0.0282461	0.0282461	HK1	Body	opensea
cg02956093	0.0073979	0.0249689	-0.0282379	0.0282379	AKT1	TSS1500	island
cg24557048	0.0672955	0.133931	0.0282361	0.0282361	PRKCZ	5'UTR	island
cg16109778	0.00900455	0.0290765	-0.0282251	0.0282251	INPP5A	Body	shore
cg26992186	0.206614	0.316354	0.0282166	0.0282166	GCK	Body	opensea
cg17084204	0.0162826	0.0455962	-0.0281928	0.0281928	IKBKB	Body	opensea
cg18066182	0.0125369	0.0372171	-0.0281784	0.0281784	PDE3B	Body	opensea
cg25023437	5.62184e-05	0.000643376	-0.0281542	0.0281542	INPPL1	TSS1500	island
cg26610624	0.0457632	0.100288	-0.0281259	0.0281259	PRKCZ	TSS1500	island
cg24430668	5.65905e-05	0.000643747	0.0281232	0.0281232	IKBKB	Body	opensea
cg06483946	0.265233	0.382301	-0.0281156	0.0281156	RAPGEF1	Body	opensea
cg07149347	0.00499954	0.0186861	0.0280989	0.0280989	MKNK1	5'UTR	opensea
cg23019125	0.301792	0.422771	-0.028095	0.028095	RPTOR	Body	shore
cg23609402	0.0121303	0.0364242	0.0280578	0.0280578	INSR	Body	opensea
cg06121644	0.226322	0.339699	0.0280272	0.0280272	GCK	TSS1500	opensea
cg21822834	0.00187557	0.00885004	0.0280188	0.0280188	AKT1	3'UTR	shelf
cg19052547	0.191859	0.300018	0.0279871	0.0279871	PRKAG2	Body	shelf
cg06053702	1.19655e-06	4.31624e-05	-0.0279796	0.0279796	RPTOR	Body	shelf
cg14176088	0.00022242	0.00179871	0.0279595	0.0279595	PIK3CD	Body	opensea
cg02635482	3.37699e-05	0.000457186	-0.027954	0.027954	PRKAR1B	Body	shelf
cg26261270	0.0157598	0.0445418	0.0279471	0.0279471	INPP5A	Body	opensea
cg21961852	0.0477064	0.103512	-0.027934	0.027934	RHEB	Body	opensea
cg24327522	0.115283	0.202855	0.0278785	0.0278785	RPTOR	Body	shelf
cg13895235	4.88428e-05	0.000583453	-0.0278589	0.0278589	PRKAR1B	5'UTR	shore
cg02558780	0.11104	0.197673	-0.0278218	0.0278218	PYGL	Body	opensea
cg01373895	0.00081786	0.00473902	-0.0277953	0.0277953	PDPK1	Body	opensea
cg20438142	0.0236865	0.0606884	0.0277931	0.0277931	PPP1R3B	TSS1500	shore
cg01368160	4.93598e-07	2.29356e-05	0.027789	0.027789	MAPK10	5'UTR	opensea
cg00429525	0.146432	0.24441	0.0277869	0.0277869	BRAF	Body	opensea
cg08447992	0.171119	0.275387	-0.0277848	0.0277848	PPP1R3C	3'UTR	shelf
cg18028612	0.0829769	0.158002	0.0277793	0.0277793	RAPGEF1	Body	opensea
cg11147190	0.26132	0.377956	0.0277739	0.0277739	AKT3	Body	opensea
cg06031849	0.0513281	0.109294	0.0277637	0.0277637	MTOR	Body	opensea
cg07706776	2.84092e-05	0.000397367	0.0277521	0.0277521	CALML3	3'UTR	shore
cg08077184	0.0894105	0.168061	0.0277514	0.0277514	MAP2K2	Body	shore
cg07068898	1.65594e-09	7.56628e-07	-0.0277188	0.0277188	EIF4E1B	5'UTR	opensea
cg14852456	0.0328766	0.0781371	0.0277148	0.0277148	GRB2	Body	opensea
cg21207694	0.0222481	0.0577634	-0.027701	0.027701	SHC4	Body	opensea
cg05338167	0.0662093	0.132394	-0.0276955	0.0276955	CALML4	1stExon	opensea
cg03253073	0.000217488	0.00176926	0.0276926	0.0276926	PRKAG2	Body	opensea
cg08122232	0.0583449	0.120348	-0.0276818	0.0276818	EXOC7	TSS1500	shore
cg08643108	0.128823	0.22163	-0.0276673	0.0276673	MKNK1-AS1	ExonBnd	shore
cg04217082	0.112179	0.198733	-0.0276489	0.0276489	EIF4EBP1	Body	shore
cg19207943	0.114749	0.20211	0.0276362	0.0276362	PRKAR1A	5'UTR	opensea
cg11026382	0.00135422	0.00688791	0.0276283	0.0276283	PRKACB	Body	opensea
cg25899969	0.109564	0.195426	-0.0276251	0.0276251	RPTOR	Body	shore
cg03513049	0.0468483	0.102065	0.0276011	0.0276011	RPTOR	Body	shelf
cg09862081	0.0354898	0.0828751	0.0275921	0.0275921	SHC4	Body	opensea
cg20110535	0.00982382	0.0310634	0.0275915	0.0275915	PRKACA	TSS1500	shelf
cg26920218	0.00757223	0.0254092	-0.0275667	0.0275667	PRKACA	Body	opensea
cg18139307	0.160888	0.262858	0.0275495	0.0275495	PRKCI	5'UTR	island
cg05931177	0.00285335	0.0122609	-0.027467	0.027467	GRB2	Body	opensea
cg07123846	0.2237	0.337415	0.0274614	0.0274614	CBL	TSS1500	shore
cg27603082	0.000110022	0.00106019	0.0274584	0.0274584	INPP5A	Body	opensea
cg23938645	0.0313405	0.0751048	-0.0274546	0.0274546	RPTOR	Body	shelf
cg19587777	0.000232645	0.0018649	0.0274314	0.0274314	CALML3	TSS200	shore
cg08024316	2.21518e-07	1.38021e-05	0.0274266	0.0274266	GRB2	5'UTR	island
cg20880254	0.058898	0.12136	0.0273866	0.0273866	PIK3CD	TSS1500	shore
cg23357150	2.32946e-06	6.68714e-05	-0.0273626	0.0273626	INPP5A	Body	shore
cg12304937	0.00445348	0.0170163	-0.027322	0.027322	PRKAR1B	Body	shelf
cg24235466	5.86484e-05	0.000658954	-0.0273205	0.0273205	PYGM	Body	opensea
cg17657395	6.30817e-06	0.000140031	-0.0272974	0.0272974	SHC4	Body	opensea
cg15095952	0.214706	0.326165	0.0272747	0.0272747	RAPGEF1	Body	opensea
cg19144769	0.00546017	0.0199855	0.0272544	0.0272544	SOS1	Body	opensea
cg01440934	0.00971989	0.0308059	-0.0272493	0.0272493	MKNK1	Body	opensea
cg15414565	5.44976e-08	5.06458e-06	0.0272385	0.0272385	INPP5A	Body	opensea
cg06924879	2.1066e-06	6.27743e-05	-0.0272125	0.0272125	G6PC2	TSS1500	opensea
cg23547617	0.0411264	0.0930681	0.0271773	0.0271773	HK1	5'UTR	opensea
cg07456061	0.0114785	0.0348528	0.0271692	0.0271692	PPP1CC	Body	opensea
cg26190348	0.255821	0.372257	-0.0271209	0.0271209	HK2	Body	shore
cg03294202	0.00121938	0.00633128	-0.0271199	0.0271199	MAPK10	Body	opensea
cg27251463	0.00124162	0.00640969	-0.0271113	0.0271113	PRKCZ	Body	opensea
cg19443023	2.39076e-07	1.45651e-05	0.0271065	0.0271065	RPTOR	Body	shore
cg04582058	0.00297119	0.0126483	-0.0270982	0.0270982	ACACB	Body	opensea
cg09273059	0.00969859	0.0307561	-0.0270856	0.0270856	HK1	Body	shore
cg01849462	0.0767284	0.14842	0.027078	0.027078	RPTOR	Body	shore
cg00104343	0.00120613	0.00628634	0.0270597	0.0270597	MTOR	Body	opensea
cg00023808	0.119192	0.208595	0.027009	0.027009	SH2B2	Body	island
cg27584146	0.000593328	0.00374794	-0.026991	0.026991	PIK3R3	TSS1500	shore
cg04875020	0.0161773	0.0454012	-0.0269795	0.0269795	HK3	Body	shore
cg19494960	0.000648388	0.00399451	0.0269716	0.0269716	RPTOR	Body	shelf
cg11762346	0.0561408	0.116702	0.0269629	0.0269629	HKDC1	5'UTR	opensea
cg24447775	0.000264719	0.0020443	-0.0269607	0.0269607	PRKCZ	Body	shore
cg08454507	0.0930953	0.172861	-0.026938	0.026938	RPTOR	Body	opensea
cg11350799	0.00117872	0.00617282	-0.0269004	0.0269004	INSR	Body	opensea
cg13648328	1.96124e-06	6.00731e-05	0.0268717	0.0268717	INPP5A	Body	opensea
cg01853818	0.00877728	0.02846	0.0268675	0.0268675	RAPGEF1	Body	opensea
cg16831246	0.0282598	0.0696397	-0.0268631	0.0268631	CALML4	Body	opensea
cg04149179	0.00048911	0.00325065	-0.0268591	0.0268591	SORBS1	Body	opensea
cg27437721	0.0291298	0.0712076	-0.0268355	0.0268355	INPP5A	Body	opensea
cg27052575	0.113984	0.201215	-0.0268231	0.0268231	CBLB	Body	opensea
cg15787544	0.0423433	0.0948788	0.0268153	0.0268153	PRKAG2	5'UTR	opensea
cg20865131	6.74515e-07	2.8449e-05	-0.0267863	0.0267863	PRKAG2	Body	opensea
cg06850721	0.00490253	0.0184366	-0.0267451	0.0267451	MAP2K1	Body	opensea
cg10784813	0.12829	0.220783	0.0267431	0.0267431	SOCS1	3'UTR	island
cg04897644	0.162002	0.264307	0.0267165	0.0267165	PKLR	Body	island
cg26284782	3.00835e-06	8.16574e-05	-0.0266861	0.0266861	PRKAG2	Body	opensea
cg03062725	0.205524	0.315398	0.0266579	0.0266579	PRKAR1A	TSS1500	shore
cg01991210	0.00107508	0.00573005	-0.026629	0.026629	CBLB	5'UTR	shore
cg15875538	0.0181564	0.0496517	-0.0266207	0.0266207	PRKCZ	Body	opensea
cg03260643	0.213068	0.324453	0.0266184	0.0266184	INPP5A	Body	opensea
cg03195600	0.000243905	0.00192699	-0.0266093	0.0266093	SOCS1	TSS1500	island
cg05334611	0.0793455	0.152169	0.0266029	0.0266029	AKT2	5'UTR	opensea
cg19032408	0.0901797	0.168929	0.0265954	0.0265954	HK1	Body	opensea
cg02240936	0.106743	0.191289	0.0265909	0.0265909	INPP5A	Body	shore
cg16194234	0.0146558	0.0419622	-0.0265902	0.0265902	PIK3CB	Body	opensea
cg08248705	0.000281294	0.00214214	0.0265663	0.0265663	MTOR	Body	shelf
cg02212173	0.194369	0.303108	0.0265581	0.0265581	AKT3	Body	opensea
cg17361443	0.0606514	0.123915	-0.0265088	0.0265088	INPP5A	Body	opensea
cg20975074	0.00642746	0.0225187	-0.0264991	0.0264991	PRKCZ	5'UTR	island
cg15633390	0.00259146	0.0113672	-0.0264977	0.0264977	EIF4E	5'UTR	shore
cg02665399	0.0492113	0.10598	0.0264686	0.0264686	PRKAR1B	Body	island
cg25643123	0.0253454	0.0639231	-0.0264275	0.0264275	GYS1	Body	shelf
cg06296100	0.0421637	0.094631	-0.0264257	0.0264257	CBLB	Body	opensea
cg03663788	0.222058	0.335324	-0.0264236	0.0264236	PYGM	Body	shore
cg19124509	0.0141674	0.040841	-0.0264056	0.0264056	MAPK10	TSS200	opensea
cg09399666	0.0462158	0.101078	-0.0263947	0.0263947	RAPGEF1	Body	opensea
cg09908758	1.03626e-05	0.000199311	0.0263778	0.0263778	PRKAR1B	Body	opensea
cg01151840	0.00682386	0.0236356	-0.0263777	0.0263777	TSC2	Body	island
cg19831386	0.00021526	0.00175375	0.0263625	0.0263625	AKT1	3'UTR	shelf
cg27210998	0.205051	0.314929	0.0263326	0.0263326	GRB2	Body	opensea
cg22878693	0.0190432	0.0513595	0.026316	0.026316	RPTOR	Body	opensea
cg05743126	0.000681352	0.00413258	0.026298	0.026298	PIK3CB	Body	opensea
cg23968634	0.172933	0.277736	0.0262797	0.0262797	PYGB	Body	opensea
cg09301984	0.00952778	0.0303934	0.0262765	0.0262765	CRKL	Body	opensea
cg11183991	0.00126303	0.00650253	-0.0262756	0.0262756	PRKAR1B	Body	shore
cg00157109	0.0373615	0.0863739	0.0262703	0.0262703	PRKAG2	Body	shelf
cg20168080	0.0211222	0.0557197	-0.0262543	0.0262543	GRB2	5'UTR	opensea
cg25510018	1.48647e-06	5.06232e-05	-0.0262201	0.0262201	TRIP10	Body	island
cg11082509	0.00183386	0.00870568	0.0261916	0.0261916	ACACA	Body	opensea
cg27330006	1.03552e-09	5.77275e-07	-0.0261868	0.0261868	TRIP10	Body	shore
cg18363644	0.0901753	0.168929	0.0261866	0.0261866	SHC4	Body	opensea
cg03325933	0.000190275	0.00159522	0.0261726	0.0261726	FLOT2	Body	opensea
cg00560428	4.8593e-05	0.000583453	0.026172	0.026172	MAPK1	Body	opensea
cg09354696	0.000134081	0.00123144	0.0261697	0.0261697	AKT3	Body	opensea
cg02438816	0.315776	0.438218	0.026137	0.026137	GRB2	Body	opensea
cg02671711	0.00014517	0.00131782	-0.0260985	0.0260985	RPTOR	Body	shore
cg22958315	1.61539e-05	0.000270036	0.0260889	0.0260889	SOS1	Body	opensea
cg23671221	0.103349	0.186709	0.0260844	0.0260844	PTPRF	Body	island
cg11990149	0.00755351	0.0253618	0.0260651	0.0260651	CBLB	TSS1500	shore
cg08535003	0.0119031	0.0358967	0.0260543	0.0260543	PPP1R3C	Body	shelf
cg21263609	0.0182289	0.0497755	0.0260253	0.0260253	MTOR	Body	opensea
cg07754669	0.207309	0.317242	0.0259112	0.0259112	GRB2	Body	opensea
cg22691727	0.03196	0.0762561	0.0259075	0.0259075	IRS1	3'UTR	opensea
cg12391964	1.03963e-05	0.000199311	0.0258909	0.0258909	PRKCZ	Body	shelf
cg14515984	1.93941e-05	0.000302956	-0.0258832	0.0258832	TSC2	Body	opensea
cg14275445	0.00577119	0.020873	0.0258668	0.0258668	INPP5A	Body	shelf
cg20923549	0.199529	0.309307	0.0258524	0.0258524	PRKAG2	Body	opensea
cg17840178	0.250391	0.365813	0.0258448	0.0258448	FLOT1	Body	shore
cg21479734	0.046349	0.101207	-0.0257946	0.0257946	RAPGEF1	Body	opensea
cg10492042	0.0257955	0.0648496	0.0257899	0.0257899	PTPRF	TSS200	shore
cg10093121	0.0108561	0.0334594	0.025768	0.025768	CRK	Body	opensea
cg25204078	0.041664	0.0938938	-0.0257357	0.0257357	BRAF	TSS1500	shore
cg14418633	0.0318916	0.0761593	0.0257172	0.0257172	PRKCZ	Body	island
cg13740339	0.0182498	0.0498076	-0.0257007	0.0257007	FBP1	Body	shore
cg03209258	0.329715	0.452362	0.0256918	0.0256918	SOS1	Body	opensea
cg02976476	0.000640198	0.00395692	-0.0256885	0.0256885	PTPN1	5'UTR	opensea
cg27235726	0.0231771	0.059606	-0.0256839	0.0256839	PRKAR1B	Body	island
cg15948025	5.16937e-05	0.00060693	-0.0256814	0.0256814	INPP5A	Body	opensea
cg19371795	0.0017514	0.00840885	-0.0256505	0.0256505	INSR	TSS1500	island
cg11283604	0.0431933	0.0962719	0.0256437	0.0256437	PRKAG2	Body	opensea
cg26360197	0.00106805	0.00571312	0.0256146	0.0256146	RPTOR	Body	shelf
cg12100376	0.00154225	0.00766648	-0.0255474	0.0255474	MTOR	Body	opensea
cg15789656	0.0880037	0.165816	0.0255344	0.0255344	PRKACA	Body	opensea
cg20462129	0.194678	0.303417	-0.0255239	0.0255239	RPTOR	Body	opensea
cg14014033	0.131183	0.224213	-0.0255109	0.0255109	PRKAR1B	Body	opensea
cg03813605	0.224654	0.337874	0.0255065	0.0255065	INPP5A	Body	opensea
cg03417182	3.81435e-05	0.000501536	-0.025497	0.025497	SORBS1	Body	opensea
cg05514648	0.000919589	0.0051608	0.0254411	0.0254411	RAPGEF1	Body	opensea
cg08129017	0.173719	0.278753	-0.0254387	0.0254387	SREBF1	Body	shore
cg02886968	0.000622048	0.00387139	0.0254334	0.0254334	INPP5A	Body	opensea
cg01262564	0.0862473	0.163123	-0.0254214	0.0254214	RAPGEF1	Body	opensea
cg07990944	0.0274554	0.0683021	0.0253992	0.0253992	PRKAR1B	Body	opensea
cg06094085	0.246898	0.362059	0.0253357	0.0253357	TSC2	Body	shore
cg08835033	0.138867	0.234567	-0.0253334	0.0253334	PRKAA2	Body	opensea
cg03020876	0.16717	0.27094	-0.025329	0.025329	EIF4EBP1	Body	opensea
cg26606542	0.0404618	0.0919023	-0.0253255	0.0253255	PTPRF	Body	shore
cg18896071	0.0646831	0.130339	0.0252999	0.0252999	AKT3	Body	opensea
cg24832218	0.151295	0.250469	-0.0252904	0.0252904	RPTOR	Body	shore
cg14915244	0.00188014	0.00886398	-0.0252771	0.0252771	PRKCZ	Body	shelf
cg24394819	0.0697014	0.137571	-0.0252769	0.0252769	RPTOR	Body	opensea
cg19638060	0.200552	0.310103	-0.0252374	0.0252374	HK1	ExonBnd	opensea
cg19239692	0.000184557	0.001578	-0.0252033	0.0252033	PRKAR1B	Body	shelf
cg19290139	0.0025714	0.0113063	-0.0251994	0.0251994	INSR	Body	opensea
cg02553170	0.0013249	0.00678284	-0.0251976	0.0251976	PRKACB	Body	opensea
cg07461953	0.0930985	0.172861	0.0251882	0.0251882	PRKAG2	5'UTR	opensea
cg21030400	0.00512467	0.0190456	0.0251871	0.0251871	MKNK2	TSS1500	shore
cg23103009	0.013067	0.0384162	-0.0251714	0.0251714	INPP5A	Body	shore
cg02754943	0.00237577	0.0106337	-0.0251327	0.0251327	CALML5	TSS200	shore
cg17524619	0.145319	0.242848	-0.0251231	0.0251231	HKDC1	Body	shore
cg01420348	0.0343818	0.0809775	0.0251145	0.0251145	PCK2	5'UTR	shore
cg01305270	0.0191902	0.051629	-0.02511	0.02511	IKBKB	Body	opensea
cg14826962	0.00766433	0.0256711	0.0250984	0.0250984	PHKG2	Body	opensea
cg19997281	0.300802	0.42214	0.0250926	0.0250926	MKNK1	5'UTR	opensea
cg04470054	0.193428	0.302142	-0.0250779	0.0250779	RPTOR	Body	shore
cg22332339	0.000327732	0.00240716	0.0250554	0.0250554	PRKCZ	TSS1500	shore
cg15914500	3.46137e-07	1.80482e-05	-0.0250153	0.0250153	HK3	Body	shelf
cg10415767	3.75026e-06	9.65384e-05	-0.0249906	0.0249906	SREBF1	Body	shore
cg07475546	3.22488e-07	1.73353e-05	-0.024973	0.024973	RPTOR	Body	opensea
cg04662369	0.628783	0.728604	0.024962	0.024962	RPTOR	Body	opensea
cg24998516	0.113772	0.20101	-0.0249616	0.0249616	PRKAR1B	Body	opensea
cg27338511	0.0340132	0.0802642	-0.0249153	0.0249153	MAPK10	5'UTR	opensea
cg15294778	0.000156718	0.00140636	-0.0249041	0.0249041	HK2	TSS1500	shelf
cg16969681	7.55283e-05	0.000797922	0.0248835	0.0248835	FOXO1	Body	opensea
cg25402124	0.0529533	0.111842	-0.0248831	0.0248831	HK1	5'UTR	opensea
cg06242242	0.00162228	0.00794901	-0.0248532	0.0248532	PRKAR1B	5'UTR	island
cg00981070	0.10521	0.189322	0.0248218	0.0248218	PRKCZ	5'UTR	island
cg17585440	0.0335178	0.0793804	-0.0248145	0.0248145	MKNK2	TSS1500	shore
cg11780053	0.0913903	0.170498	-0.0248038	0.0248038	INSR	Body	shore
cg07730183	1.94423e-07	1.22531e-05	-0.0247941	0.0247941	TSC2	Body	shore
cg11686251	0.000909077	0.00510704	-0.0247765	0.0247765	RAPGEF1	Body	opensea
cg11304195	1.03543e-06	3.86206e-05	-0.0247727	0.0247727	AKT3	Body	opensea
cg00496504	0.000175953	0.00152376	-0.0247674	0.0247674	RAF1	3'UTR	opensea
cg18815355	0.154261	0.254227	0.0247555	0.0247555	PTPRF	TSS1500	shore
cg01475980	0.000103536	0.00100832	-0.0247552	0.0247552	PRKAB1	Body	opensea
cg15268136	0.125732	0.217542	-0.0247313	0.0247313	PTPRF	Body	island
cg22366001	0.154801	0.254964	-0.0247177	0.0247177	PRKCZ	5'UTR	shore
cg04790857	0.214397	0.325905	0.0247001	0.0247001	ACACA	Body	opensea
cg06891043	0.157998	0.259062	-0.0246852	0.0246852	SLC2A4	Body	shore
cg15733111	0.0664713	0.132725	0.0246787	0.0246787	PIK3CD	Body	shore
cg13549638	0.00167996	0.00813711	0.0246716	0.0246716	RPTOR	Body	shelf
cg19900677	0.000207535	0.00170857	-0.0246709	0.0246709	PRKCZ	Body	opensea
cg05729249	0.000401317	0.00278534	-0.0246631	0.0246631	PRKAR1B	5'UTR	island
cg17010023	8.7855e-08	7.08396e-06	0.0246626	0.0246626	INPP5A	Body	shelf
cg09517126	0.0252012	0.0637354	-0.0246428	0.0246428	HK1	Body	opensea
cg24065304	0.37147	0.496168	-0.0246375	0.0246375	PHKB	Body	opensea
cg17283294	0.162017	0.264307	-0.0246154	0.0246154	PKLR	Body	shore
cg25788451	0.0225012	0.0582228	-0.0246148	0.0246148	PRKAG3	TSS1500	opensea
cg09166237	0.0123632	0.0368609	-0.0245945	0.0245945	G6PC	TSS200	opensea
cg05626094	0.000139182	0.00126978	0.0245824	0.0245824	TSC2	Body	shore
cg11270806	0.0613705	0.125137	-0.024577	0.024577	PPARGC1A	TSS1500	opensea
cg03777518	0.04839	0.104664	-0.0245431	0.0245431	PRKCZ	5'UTR	shore
cg04681879	6.86422e-05	0.000742338	0.024539	0.024539	RPTOR	Body	opensea
cg07440417	0.0017438	0.00837972	-0.0245363	0.0245363	GSK3B	Body	opensea
cg22580935	0.000524562	0.0034281	-0.0245175	0.0245175	MKNK2	Body	island
cg23909584	0.0264064	0.0662031	-0.0245063	0.0245063	PPP1R3C	Body	shore
cg17331032	0.0593784	0.122166	0.0245061	0.0245061	FBP1	Body	opensea
cg00689835	0.0386805	0.0886294	0.0244612	0.0244612	G6PC2	TSS200	opensea
cg13435326	0.000219927	0.00178646	0.0244604	0.0244604	PIK3CA	5'UTR	opensea
cg26884581	8.18286e-05	0.00084654	0.0244521	0.0244521	PYGM	1stExon	opensea
cg04198750	0.160236	0.262076	-0.0244376	0.0244376	HK1	Body	opensea
cg01002439	0.000288383	0.00218398	0.0243944	0.0243944	GYS1	Body	opensea
cg18234857	0.0208314	0.0552848	-0.0243504	0.0243504	CBLB	Body	opensea
cg16058496	0.00460724	0.0174941	0.0243488	0.0243488	PYGM	1stExon	opensea
cg02462904	0.00387304	0.0153071	0.024315	0.024315	RPTOR	Body	opensea
cg25579477	2.00777e-06	6.0821e-05	0.0243149	0.0243149	PRKAG2	5'UTR	opensea
cg01561259	0.0340172	0.0802642	-0.0243005	0.0243005	RPTOR	Body	opensea
cg15767676	0.0291171	0.0712076	0.0242737	0.0242737	PRKCZ	Body	shore
cg11282898	2.9004e-05	0.000403626	-0.024258	0.024258	GCK	Body	shore
cg20432372	0.00492711	0.0185037	-0.0242537	0.0242537	PHKB	Body	opensea
cg06717814	1.23886e-05	0.000225671	0.0242536	0.0242536	PRKCZ	5'UTR	island
cg06418219	0.0687171	0.136315	0.0242377	0.0242377	SHC1	TSS1500	shore
cg02392881	0.000100686	0.000984062	0.0242165	0.0242165	PRKAR2B	Body	opensea
cg15556748	4.12164e-06	0.000102456	-0.0242122	0.0242122	SHC1	5'UTR	island
cg26556014	0.0857843	0.162528	-0.0241913	0.0241913	EIF4E2	Body	opensea
cg09341685	0.062071	0.126331	-0.0241797	0.0241797	MTOR	Body	opensea
cg19816125	0.203486	0.313457	-0.0241581	0.0241581	PRKAR1B	Body	island
cg12776698	0.138719	0.234462	-0.0241478	0.0241478	MTOR	Body	opensea
cg18676350	1.8028e-05	0.000288186	-0.0241297	0.0241297	TSC2	ExonBnd	shore
cg19370684	0.000363066	0.00258868	-0.0241089	0.0241089	PRKCZ	Body	island
cg14547599	0.379821	0.503886	0.0240462	0.0240462	PRKAG1	Body	shelf
cg19393006	0.038207	0.0879097	-0.0240459	0.0240459	TSC1	TSS1500	shore
cg02393699	0.0212072	0.0558388	0.0240295	0.0240295	PRKCZ	Body	opensea
cg01684175	0.263863	0.380527	-0.0239901	0.0239901	FOXO1	Body	opensea
cg17323298	0.0984064	0.180129	-0.0239874	0.0239874	RPTOR	Body	shore
cg24154257	0.213989	0.325646	0.0239814	0.0239814	PRKAG2	5'UTR	opensea
cg24107142	0.00387262	0.0153071	-0.0239536	0.0239536	HK2	1stExon	shore
cg01216407	0.00228509	0.0102867	-0.0239491	0.0239491	MAPK10	5'UTR	opensea
cg21150288	0.137869	0.233241	0.0239092	0.0239092	PRKAR1B	Body	shore
cg09499735	0.000317857	0.00235389	-0.0239038	0.0239038	ACACB	Body	opensea
cg04820159	0.0760743	0.147547	-0.0238764	0.0238764	AKT1	Body	shore
cg06376402	0.0039384	0.0155099	0.0238537	0.0238537	INPP5A	Body	opensea
cg13174051	0.0865283	0.163542	-0.023846	0.023846	INPP5A	Body	opensea
cg19360969	0.0511128	0.108878	0.0238228	0.0238228	FOXO1	Body	opensea
cg03919766	0.00106727	0.00571312	-0.0238222	0.0238222	RAPGEF1	Body	opensea
cg04287259	0.0503032	0.107655	-0.0238006	0.0238006	PIK3CD	5'UTR	opensea
cg09163720	0.00188217	0.00886595	0.023781	0.023781	INPP5A	Body	opensea
cg17630144	0.328398	0.451411	0.0237724	0.0237724	RAF1	ExonBnd	opensea
cg05677959	0.0190856	0.0514485	-0.023758	0.023758	MTOR	Body	opensea
cg06528362	0.0426324	0.0953553	0.0237442	0.0237442	PTPN1	5'UTR	opensea
cg26825108	0.249437	0.364801	0.0237173	0.0237173	PTPN1	5'UTR	opensea
cg13433214	0.00231855	0.0104202	-0.0237001	0.0237001	PRKACB	TSS200	opensea
cg26600490	0.0128702	0.0379598	0.0236723	0.0236723	FOXO1	Body	opensea
cg15815120	0.00067717	0.00411177	-0.0236693	0.0236693	RPTOR	Body	shore
cg26349793	0.0362911	0.0842643	0.0236396	0.0236396	RAPGEF1	1stExon	opensea
cg20163101	0.0766437	0.14842	-0.0236052	0.0236052	PIK3CB	Body	opensea
cg17757646	0.0143848	0.0413807	-0.0235986	0.0235986	PRKAR2B	Body	opensea
cg05955997	0.279701	0.398648	0.0235953	0.0235953	CBLB	Body	opensea
cg09124982	0.0289727	0.0710397	-0.0235814	0.0235814	MAPK10	Body	opensea
cg02254263	0.0418572	0.094213	-0.023568	0.023568	HK1	Body	opensea
cg13387826	0.510913	0.627539	-0.0235628	0.0235628	PRKCZ	1stExon	island
cg06646728	0.0184978	0.0502095	-0.0235623	0.0235623	PRKCZ	Body	opensea
cg20810198	0.112278	0.198779	-0.0234964	0.0234964	PCK1	TSS200	opensea
cg03278510	1.63224e-05	0.000271199	-0.0234879	0.0234879	PRKAR1B	Body	opensea
cg06744868	0.101482	0.184226	-0.0234809	0.0234809	SORBS1	Body	opensea
cg00966686	0.001216	0.00632572	0.0234709	0.0234709	MAP2K2	Body	island
cg12399557	2.45228e-07	1.4738e-05	-0.0234637	0.0234637	INPP5A	Body	shelf
cg15988457	7.47921e-06	0.00016019	-0.023433	0.023433	INPP5A	Body	shore
cg22263310	6.52092e-09	1.43017e-06	-0.0234001	0.0234001	PHKB	ExonBnd	opensea
cg09294702	0.111426	0.198053	-0.023394	0.023394	PTPRF	Body	opensea
cg23620184	0.000147063	0.0013328	0.0233919	0.0233919	PPP1R3E	TSS1500	shore
cg00253023	4.62972e-05	0.000570654	0.0233745	0.0233745	PRKAR1A	Body	opensea
cg23660625	9.70608e-07	3.72157e-05	-0.02333	0.02333	MKNK2	Body	island
cg19832898	0.0106551	0.0329323	-0.0232838	0.0232838	HKDC1	Body	shelf
cg25304754	0.013932	0.0403748	-0.0232593	0.0232593	PRKCZ	Body	opensea
cg19412964	0.170051	0.274313	-0.0232534	0.0232534	PRKAG2	Body	opensea
cg17582042	0.000533548	0.00346438	-0.0231803	0.0231803	MAP2K2	Body	shore
cg22281120	0.304632	0.425879	0.0231759	0.0231759	INSR	Body	opensea
cg16422190	9.6758e-05	0.000957219	-0.0231571	0.0231571	GYS1	Body	opensea
cg26647303	0.021101	0.0557197	-0.0231534	0.0231534	MKNK2	Body	island
cg08201721	0.00604883	0.0215362	0.0231528	0.0231528	PIK3CD	5'UTR	shore
cg21855205	0.0160795	0.0452122	0.0231513	0.0231513	PPP1CA	Body	island
cg18162838	0.0396642	0.0904279	0.023143	0.023143	HK1	TSS1500	shelf
cg00764159	0.117618	0.206236	0.0230933	0.0230933	CBLB	Body	opensea
cg19807317	0.0144519	0.0415302	0.0230932	0.0230932	INPP5A	Body	opensea
cg13870500	0.0360089	0.0838017	0.0230762	0.0230762	PRKAG2	Body	opensea
cg09381027	0.0335068	0.0793804	0.0230756	0.0230756	CRK	Body	opensea
cg25726135	0.0123761	0.0368622	-0.0230662	0.0230662	PRKCZ	Body	opensea
cg11227141	0.00358371	0.0145037	-0.0230615	0.0230615	PRKCZ	TSS1500	shore
cg26184687	0.245918	0.361008	0.0230469	0.0230469	MKNK2	Body	island
cg22364929	0.0296894	0.0721574	0.0230224	0.0230224	CALML6	TSS200	shelf
cg20155005	0.000440347	0.00301426	-0.0229801	0.0229801	SREBF1	ExonBnd	opensea
cg20236533	7.17827e-05	0.000767221	0.0229763	0.0229763	EIF4E	5'UTR	island
cg06791083	0.00929684	0.0298097	0.0229649	0.0229649	PRKCZ	Body	shore
cg05988239	0.132478	0.225934	0.0229637	0.0229637	RPTOR	Body	shore
cg16711450	0.0585956	0.120782	0.0229521	0.0229521	INS	TSS1500	shelf
cg05149245	2.43486e-05	0.000362782	-0.0229406	0.0229406	GYS2	Body	opensea
cg21471928	0.0102069	0.0319314	0.0229405	0.0229405	AKT1	5'UTR	shore
cg15059751	0.124373	0.215666	-0.0229281	0.0229281	CRK	3'UTR	opensea
cg25589929	0.0170618	0.0473191	0.0229279	0.0229279	GRB2	5'UTR	shelf
cg27637521	0.0452213	0.0993384	0.0229107	0.0229107	SOCS3	5'UTR	island
cg05918012	0.138828	0.234567	0.0229025	0.0229025	PPP1CC	Body	opensea
cg04475433	0.000729834	0.00436388	0.0228866	0.0228866	FLOT2	Body	opensea
cg02347356	0.00201196	0.00933146	-0.0228481	0.0228481	PRKCZ	Body	island
cg01189604	0.289795	0.409819	-0.0228232	0.0228232	INPP5A	Body	opensea
cg17434577	1.41384e-05	0.000246882	0.0228083	0.0228083	RPTOR	Body	opensea
cg23449993	0.413504	0.537691	-0.0228016	0.0228016	PIK3R3	Body	opensea
cg26573321	0.0007474	0.00444468	-0.0227922	0.0227922	PIK3CD	TSS200	shore
cg00443188	0.191143	0.299648	-0.0227816	0.0227816	SORBS1	5'UTR	opensea
cg09765522	0.032398	0.077167	-0.0227773	0.0227773	RPTOR	3'UTR	island
cg15618473	0.37738	0.501496	-0.0227671	0.0227671	INPPL1	Body	shelf
cg07617636	0.000195172	0.00162141	-0.0227612	0.0227612	PRKAG2	Body	opensea
cg00425250	0.142555	0.239176	-0.0227564	0.0227564	PTPRF	Body	opensea
cg15195816	0.0414788	0.0936304	0.0227393	0.0227393	PIK3CD	5'UTR	opensea
cg24144574	0.0510058	0.108819	-0.0226894	0.0226894	PRKAR1B	Body	opensea
cg00578437	0.204269	0.314301	0.022656	0.022656	MAPK1	Body	shelf
cg12654199	0.392282	0.516914	0.0226208	0.0226208	RPTOR	Body	opensea
cg26733897	0.124757	0.21624	-0.0226142	0.0226142	RPTOR	Body	opensea
cg10733317	0.113711	0.200992	-0.0225985	0.0225985	FOXO1	Body	opensea
cg14479617	0.000392955	0.00274118	-0.0225577	0.0225577	GSK3B	3'UTR	opensea
cg26007849	0.00590534	0.0211766	0.0225557	0.0225557	CALM1	3'UTR	opensea
cg01907726	0.0580323	0.119801	-0.0225435	0.0225435	RAF1	Body	opensea
cg10334053	0.0374847	0.0866114	-0.0225113	0.0225113	PRKCZ	Body	opensea
cg17961101	0.000967876	0.00536985	-0.0224968	0.0224968	MAPK1	TSS200	island
cg00305996	0.19555	0.304175	-0.0224445	0.0224445	IRS1	3'UTR	shore
cg03868063	0.00716287	0.0244545	0.0224243	0.0224243	RAPGEF1	Body	opensea
cg22592475	0.189435	0.297529	0.0223971	0.0223971	PIK3R1	Body	opensea
cg24069126	0.401966	0.527111	-0.0223877	0.0223877	PTPN1	5'UTR	opensea
cg22528270	0.0163944	0.0458392	-0.022372	0.022372	PRKAG2	5'UTR	opensea
cg03234781	0.0561479	0.116702	0.0223642	0.0223642	INPPL1	ExonBnd	shelf
cg12131324	0.134195	0.228577	0.0223559	0.0223559	RPTOR	Body	shelf
cg04615080	0.0131666	0.0385841	-0.0223558	0.0223558	CBLB	Body	opensea
cg06553442	0.0252416	0.0637788	-0.0223448	0.0223448	MAPK10	TSS1500	opensea
cg22404606	0.000595741	0.00375886	-0.022292	0.022292	GYS1	Body	opensea
cg08802981	0.00175351	0.00841162	0.0222831	0.0222831	GCK	Body	opensea
cg20100014	4.46869e-09	1.19713e-06	0.0222727	0.0222727	RPTOR	Body	opensea
cg06831279	0.0322288	0.0768308	-0.0222663	0.0222663	MTOR	Body	opensea
cg05241265	0.0762124	0.14774	-0.0222548	0.0222548	MAPK8	Body	opensea
cg04191427	0.0419471	0.0942993	0.0222023	0.0222023	RPTOR	Body	shore
cg11196702	0.223921	0.337564	0.0221998	0.0221998	PRKAG2	5'UTR	opensea
cg13077150	0.0170481	0.0473059	-0.0221893	0.0221893	PRKCZ	TSS1500	shore
cg11507895	0.0391847	0.0895954	-0.0221886	0.0221886	MAPK10	TSS1500	opensea
cg05548067	0.157373	0.258332	0.0221746	0.0221746	PRKAR1B	Body	shore
cg05280754	0.00210774	0.0096146	-0.0221449	0.0221449	PDE3B	Body	opensea
cg21130124	4.47988e-05	0.000558963	-0.022124	0.022124	CALML5	TSS1500	shore
cg20268208	1.47739e-06	5.06232e-05	-0.0221124	0.0221124	PRKAR1B	Body	shore
cg07726222	0.00265328	0.011592	-0.0221099	0.0221099	TSC2	Body	island
cg25727019	0.0215461	0.0563363	-0.0221078	0.0221078	PRKCZ	Body	opensea
cg06521145	0.0918715	0.171104	-0.0221003	0.0221003	MKNK2	Body	shore
cg02606081	0.0285237	0.0701845	-0.0220969	0.0220969	HRAS	TSS1500	island
cg05532178	0.0173767	0.0479741	-0.0220676	0.0220676	HKDC1	TSS1500	opensea
cg14950616	0.000157847	0.00141187	0.0220485	0.0220485	MKNK1	Body	opensea
cg09718810	0.000499291	0.00329833	-0.0220208	0.0220208	MAPK9	TSS1500	island
cg17231776	0.00873163	0.0283623	-0.0219949	0.0219949	HK3	Body	island
cg18824556	0.00721248	0.0245279	0.0219762	0.0219762	GYS2	TSS1500	opensea
cg06183531	0.00242842	0.0108076	-0.0219698	0.0219698	FOXO1	Body	opensea
cg25118002	5.00847e-05	0.000592981	0.0219561	0.0219561	TSC2	Body	shore
cg02350334	0.000343018	0.0024845	-0.0219299	0.0219299	PTPN1	5'UTR	opensea
cg14743859	0.00522727	0.0193526	-0.0219299	0.0219299	PRKCZ	5'UTR	shore
cg18938190	0.116365	0.204431	-0.0219257	0.0219257	PRKCZ	Body	opensea
cg21863005	0.0508179	0.108503	-0.0219241	0.0219241	PRKCZ	TSS1500	shelf
cg18469159	0.23075	0.344648	-0.021907	0.021907	RPTOR	Body	opensea
cg17821659	0.340198	0.463546	0.0218841	0.0218841	GSK3B	Body	opensea
cg24858665	0.00141548	0.00712681	0.0218648	0.0218648	FOXO1	Body	opensea
cg25184202	0.00140948	0.0071117	-0.0218332	0.0218332	PRKAR1B	Body	shore
cg20477591	0.000588073	0.00371903	-0.0218239	0.0218239	PIK3R1	3'UTR	opensea
cg20035206	0.0176134	0.0484811	-0.0218037	0.0218037	GCK	Body	opensea
cg05283385	0.0607425	0.124041	0.021789	0.021789	RAPGEF1	TSS200	opensea
cg00398938	0.00305489	0.0128819	-0.021752	0.021752	CALM1	Body	opensea
cg07532155	0.00223776	0.0101234	0.0217261	0.0217261	PTPRF	TSS200	shore
cg27483716	0.00018705	0.00159133	0.0217233	0.0217233	IKBKB	Body	opensea
cg19589060	0.284141	0.403771	-0.0216856	0.0216856	HK3	TSS200	opensea
cg08690709	0.188331	0.296644	-0.0216824	0.0216824	HK3	ExonBnd	shore
cg04181682	0.371782	0.496344	-0.0216702	0.0216702	PIK3R3	Body	opensea
cg00940260	0.243435	0.358323	-0.0216672	0.0216672	MKNK1	Body	opensea
cg12193249	0.00586949	0.0210803	-0.0216467	0.0216467	SHC2	Body	island
cg22084339	0.0933605	0.173113	-0.0216286	0.0216286	PRKAR1B	TSS1500	shore
cg26281025	2.75799e-05	0.000389256	-0.0216129	0.0216129	HK3	3'UTR	shelf
cg06821641	0.000599453	0.00377382	0.0216129	0.0216129	PRKCZ	Body	opensea
cg18354248	0.336834	0.459532	-0.0215557	0.0215557	PPP1R3C	Body	shelf
cg04647757	0.029016	0.0710561	0.0215484	0.0215484	SORBS1	5'UTR	opensea
cg02382706	9.12851e-07	3.58315e-05	-0.021539	0.021539	CALML5	1stExon	shore
cg10239857	0.248312	0.363646	0.0215192	0.0215192	PIK3R3	Body	opensea
cg06340969	0.0211274	0.0557197	-0.0215099	0.0215099	PRKCZ	Body	island
cg26365784	8.14989e-06	0.000169265	-0.0215057	0.0215057	INPP5A	Body	shore
cg18185116	1.53045e-05	0.000260603	0.0215038	0.0215038	PRKAR1B	Body	shore
cg27160537	0.0076955	0.025744	-0.021491	0.021491	PRKAR1B	Body	shelf
cg14059665	0.0388232	0.08888	0.0214532	0.0214532	RPTOR	Body	shelf
cg00549398	0.103341	0.186709	0.021453	0.021453	RPTOR	Body	opensea
cg11636714	0.000412295	0.00285141	-0.0214267	0.0214267	IKBKB	5'UTR	island
cg08833024	1.03009e-06	3.86206e-05	-0.0214244	0.0214244	PRKAG2	Body	opensea
cg04973925	0.0395313	0.0901622	0.0214029	0.0214029	SHC4	Body	opensea
cg00431545	0.0146249	0.0418958	0.0214017	0.0214017	PRKAA1	TSS200	island
cg05570682	0.0472088	0.102686	-0.0214008	0.0214008	IKBKB	Body	shelf
cg21070009	0.00530896	0.019602	-0.0213887	0.0213887	MAP2K1	Body	opensea
cg21266798	0.0312237	0.0748968	-0.0213683	0.0213683	IRS2	Body	shore
cg16323609	0.000828581	0.00476717	0.0213665	0.0213665	PRKAR2A	TSS1500	shore
cg07547279	5.5366e-07	2.46806e-05	0.021351	0.021351	PRKAG2	TSS1500	opensea
cg11523325	0.0001897	0.00159522	0.021333	0.021333	FLOT1	Body	shelf
cg09641262	2.77352e-05	0.000389928	0.021333	0.021333	FLOT1	Body	opensea
cg00356511	8.06171e-07	3.27425e-05	0.0213209	0.0213209	ACACA	5'UTR	island
cg09209109	1.08674e-06	4.00374e-05	0.0213151	0.0213151	PRKAB1	Body	opensea
cg27347012	0.00134553	0.00685647	0.0213025	0.0213025	SHC1	Body	shelf
cg22463866	1.29578e-05	0.000232181	-0.0212977	0.0212977	PRKCI	Body	opensea
cg17887234	0.0330804	0.0784855	-0.0212969	0.0212969	HK1	Body	opensea
cg10881923	0.199696	0.309477	0.0212927	0.0212927	RPTOR	Body	shore
cg13920875	5.33824e-08	5.04648e-06	-0.0212669	0.0212669	PIK3CD	ExonBnd	shore
cg12339476	0.0102071	0.0319314	0.0212494	0.0212494	MAPK10	5'UTR	opensea
cg03732007	0.000860553	0.0049099	0.0212491	0.0212491	PRKCZ	5'UTR	opensea
cg16834708	0.000511383	0.00336201	0.0212066	0.0212066	KRAS	TSS200	opensea
cg24004692	0.039782	0.0906587	-0.0211995	0.0211995	GRB2	TSS1500	shore
cg05595692	0.074591	0.145184	-0.0211819	0.0211819	HK2	TSS1500	shore
cg11958594	0.430276	0.55186	0.0211619	0.0211619	FASN	5'UTR	island
cg10998280	0.146801	0.244728	0.0211452	0.0211452	AKT3	Body	opensea
cg09485632	0.000808838	0.00469794	-0.0211098	0.0211098	PIK3R1	Body	opensea
cg13476133	0.0003101	0.00231646	-0.0211027	0.0211027	GCK	Body	island
cg10554424	9.65829e-07	3.72157e-05	-0.0210607	0.0210607	GYS2	Body	opensea
cg15192009	0.000501114	0.00330639	-0.0210552	0.0210552	ACACA	Body	opensea
cg09313917	0.000206983	0.00170659	0.0210462	0.0210462	PRKAA2	Body	shore
cg25852223	0.0160513	0.0451562	0.0209983	0.0209983	PRKAA1	Body	opensea
cg05799550	4.36927e-05	0.000552759	-0.0209027	0.0209027	G6PC2	TSS1500	opensea
cg24061580	0.015402	0.0437335	-0.0209011	0.0209011	PRKAG2	5'UTR	island
cg24245397	0.312701	0.434831	0.0209007	0.0209007	HK1	Body	opensea
cg06967127	0.000566531	0.00361196	0.0208818	0.0208818	CRK	Body	shore
cg06991955	0.00225463	0.0101746	0.0208639	0.0208639	TSC2	Body	island
cg09715958	0.309438	0.43084	0.0208211	0.0208211	SORBS1	5'UTR	opensea
cg19836803	0.0789465	0.151722	-0.0207786	0.0207786	MTOR	Body	opensea
cg02119341	0.0872635	0.164707	-0.0207212	0.0207212	PIK3R3	TSS200	opensea
cg00775425	0.00285944	0.0122681	-0.0207202	0.0207202	PRKACB	TSS200	opensea
cg10295552	0.0973841	0.17876	-0.0206972	0.0206972	ACACA	Body	opensea
cg00443516	0.228457	0.342342	0.0206859	0.0206859	PRKCZ	5'UTR	shore
cg09741588	8.31588e-05	0.000853857	-0.0206806	0.0206806	SOCS2	TSS1500	shore
cg23232459	0.00413525	0.0160692	0.0206641	0.0206641	EIF4E1B	5'UTR	opensea
cg00767442	0.159669	0.26149	0.0206532	0.0206532	PPARGC1A	Body	opensea
cg04761094	0.144478	0.241736	0.0206507	0.0206507	LIPE	Body	shore
cg04847830	0.246874	0.362059	0.0206419	0.0206419	TSC2	Body	shore
cg15139745	0.000184767	0.001578	0.0206345	0.0206345	LIPE	Body	island
cg23131760	8.94358e-05	0.000902008	0.0206156	0.0206156	AKT3	Body	opensea
cg07486221	1.2082e-08	2.13695e-06	-0.0206145	0.0206145	EIF4EBP1	Body	opensea
cg02387974	3.89657e-06	9.84556e-05	-0.020576	0.020576	PRKAG2	Body	island
cg17600065	0.00146819	0.00735166	-0.0205642	0.0205642	PIK3CD-AS2	Body	shelf
cg06581729	0.023226	0.0597037	0.0205427	0.0205427	PPP1CB	Body	opensea
cg14778173	5.41242e-07	2.43248e-05	0.0205151	0.0205151	PRKCZ	Body	opensea
cg05119218	0.136899	0.23203	0.0204975	0.0204975	HK3	TSS1500	opensea
cg17270821	0.0196804	0.0526893	0.0204961	0.0204961	INPP5A	Body	shore
cg22342249	0.00708619	0.0242835	-0.0204943	0.0204943	PRKCZ	5'UTR	shelf
cg19423175	0.000848216	0.0048496	0.0204839	0.0204839	MAP2K2	Body	shelf
cg11549166	0.138698	0.234462	0.020475	0.020475	CALML6	TSS200	shelf
cg11282705	2.34963e-05	0.000353929	0.0204707	0.0204707	PRKAG2	Body	opensea
cg24702286	0.0468536	0.102065	-0.0204285	0.0204285	PTPN1	TSS1500	shore
cg08267115	0.00305156	0.0128805	0.0204264	0.0204264	PHKB	TSS1500	island
cg10501278	1.66786e-06	5.41957e-05	-0.0204214	0.0204214	MAP2K1	Body	island
cg05340048	0.00471613	0.0178089	-0.0203357	0.0203357	PRKCZ	Body	shore
cg27136914	0.22444	0.337775	0.020333	0.020333	INPP5A	Body	shore
cg09917729	1.24334e-06	4.4557e-05	-0.0203299	0.0203299	RPTOR	Body	shore
cg10974128	0.088133	0.166002	0.0203232	0.0203232	PPP1R3C	TSS1500	shore
cg09899557	0.307123	0.42827	-0.0203108	0.0203108	PPARGC1A	Body	opensea
cg27457201	0.0038034	0.0151226	0.0203044	0.0203044	RPTOR	Body	shelf
cg08060936	0.000953312	0.005312	-0.0202988	0.0202988	CALM3	3'UTR	opensea
cg08734093	3.01851e-07	1.67177e-05	0.0202852	0.0202852	MTOR	TSS200	island
cg01325426	0.181497	0.287949	-0.0202843	0.0202843	HRAS	TSS1500	island
cg22161269	0.0233059	0.0598529	-0.020281	0.020281	RPTOR	Body	opensea
cg16466485	0.000974013	0.00538901	-0.0202714	0.0202714	PRKACB	Body	opensea
cg15043106	0.000418887	0.00288901	-0.0202684	0.0202684	CRK	Body	opensea
cg26768406	0.17244	0.277026	0.0202658	0.0202658	ACACA	Body	opensea
cg07450393	4.87011e-05	0.000583453	0.0202595	0.0202595	RPTOR	Body	shore
cg20368458	0.00440544	0.0168798	-0.0202486	0.0202486	PRKAR1A	5'UTR	opensea
cg18104285	0.255758	0.372257	0.020233	0.020233	PIK3R1	TSS200	opensea
cg02901365	0.281821	0.401059	0.020222	0.020222	GCK	1stExon	opensea
cg14678830	0.00941829	0.0301111	-0.0202196	0.0202196	GSK3B	Body	opensea
cg14815086	0.0298064	0.0723455	0.0202074	0.0202074	CALML4	Body	opensea
cg27495643	0.127732	0.220031	0.0202041	0.0202041	PRKAR1B	Body	island
cg24670552	0.379036	0.503086	-0.0202031	0.0202031	IRS2	1stExon	island
cg19138081	0.0642584	0.129772	0.0201969	0.0201969	FBP1	Body	opensea
cg25662428	0.024604	0.0626294	-0.0201951	0.0201951	MKNK2	Body	shore
cg24455383	0.00533315	0.0196516	0.0201941	0.0201941	AKT3	Body	opensea
cg19919677	0.376021	0.500305	-0.0201882	0.0201882	CBLB	Body	opensea
cg16311946	0.0981738	0.179969	-0.0201868	0.0201868	INPP5A	Body	island
cg08166272	0.201072	0.310645	-0.0201844	0.0201844	IRS1	1stExon	island
cg22486214	0.00429364	0.0165091	-0.0201593	0.0201593	RPTOR	Body	opensea
cg01783730	0.000841063	0.00483391	-0.0201486	0.0201486	PRKAR1B	Body	shelf
cg08072992	9.63112e-07	3.72157e-05	0.0201471	0.0201471	PRKACA	TSS1500	shore
cg04549524	0.10481	0.189037	-0.0201406	0.0201406	INPP5A	Body	opensea
cg14768558	8.92981e-05	0.000902008	-0.0201264	0.0201264	PYGB	Body	opensea
cg26213484	0.000241334	0.00191773	0.0201109	0.0201109	TSC1	Body	opensea
cg14310198	0.0193481	0.0519774	0.0201103	0.0201103	RAPGEF1	Body	opensea
cg18107623	0.20432	0.314301	0.0200713	0.0200713	PRKAG2	Body	shore
cg21684053	0.497043	0.614495	0.0200645	0.0200645	MKNK2	TSS200	island
cg02898821	0.103538	0.18699	-0.0200605	0.0200605	MAPK10	TSS1500	opensea
cg22386583	0.234901	0.349326	0.0200332	0.0200332	RPTOR	Body	opensea
cg02884928	0.0828247	0.157894	0.0200101	0.0200101	AKT1	Body	island
cg16998839	0.031326	0.0751031	-0.0199939	0.0199939	RAPGEF1	Body	opensea
cg12711627	1.03414e-05	0.000199311	-0.0199922	0.0199922	PRKCZ	Body	island
cg04136113	0.0699516	0.137901	0.0199842	0.0199842	RPTOR	Body	opensea
cg26930596	0.0870939	0.164497	-0.0199766	0.0199766	PRKCZ	Body	island
cg03907570	0.0723991	0.141773	0.0199676	0.0199676	PRKAR1B	Body	opensea
cg03028099	7.71974e-05	0.000809318	0.0199636	0.0199636	PIK3CB	Body	opensea
cg14873699	1.2656e-05	0.000228266	-0.0199627	0.0199627	PRKAG2	Body	opensea
cg15097361	0.226474	0.339834	0.0199079	0.0199079	RPTOR	Body	shore
cg04970487	0.233291	0.347755	0.0199027	0.0199027	INPPL1	Body	shelf
cg16496699	0.00355161	0.0144569	0.0198982	0.0198982	MTOR	Body	opensea
cg19602187	0.00705384	0.0242029	-0.0198849	0.0198849	INPP5A	Body	opensea
cg27088449	1.03499e-05	0.000199311	0.0198606	0.0198606	CRKL	Body	shore
cg25030347	0.00195129	0.00910545	0.0198572	0.0198572	RPTOR	Body	opensea
cg04797323	0.119325	0.208696	0.0198544	0.0198544	SOCS2	Body	island
cg00592104	0.00995823	0.0313979	0.0198473	0.0198473	INPPL1	ExonBnd	opensea
cg12085119	0.0278378	0.0688784	0.0198355	0.0198355	IRS2	Body	shelf
cg18608290	0.00275885	0.011939	-0.0198124	0.0198124	MAP2K2	Body	island
cg27438690	0.0058708	0.0210803	-0.0198119	0.0198119	AKT3	Body	opensea
cg01441612	0.000129994	0.00121011	0.0198056	0.0198056	PTPN1	TSS1500	shore
cg07702089	0.00245139	0.0108658	-0.0197704	0.0197704	RPTOR	Body	opensea
cg09620929	0.24432	0.359337	0.0196937	0.0196937	PRKAG2	5'UTR	opensea
cg13717343	4.87802e-05	0.000583453	0.0196591	0.0196591	BRAF	Body	opensea
cg00434573	0.306249	0.427376	-0.0196262	0.0196262	MKNK2	Body	island
cg07944811	2.98274e-05	0.000411949	-0.0196235	0.0196235	GCK	1stExon	opensea
cg23024209	1.46641e-05	0.000253638	0.0196124	0.0196124	PHKB	Body	opensea
cg25312054	0.00086673	0.00494	0.0195863	0.0195863	IRS2	1stExon	island
cg23428724	0.169921	0.274183	-0.0195686	0.0195686	CRK	3'UTR	opensea
cg22730959	7.80247e-05	0.000813326	-0.0195465	0.0195465	PHKG2	TSS1500	shore
cg24578937	0.332291	0.454645	0.019526	0.019526	PRKCZ	Body	opensea
cg04751089	0.0392437	0.0896183	-0.0195239	0.0195239	IRS1	3'UTR	shelf
cg07696757	0.0571975	0.118613	0.0195019	0.0195019	GCK	1stExon	opensea
cg17650397	0.31886	0.441381	0.0195018	0.0195018	PRKAR1B	Body	shore
cg13329054	0.454109	0.574234	-0.0194955	0.0194955	RAPGEF1	Body	opensea
cg01565083	0.000490612	0.00325669	-0.0194924	0.0194924	FASN	Body	shore
cg25061073	0.0215372	0.0563363	-0.0194711	0.0194711	FOXO1	Body	opensea
cg09361653	0.0553586	0.115587	0.0194681	0.0194681	RPTOR	Body	shore
cg00551345	0.0003682	0.00261531	0.0194415	0.0194415	PYGM	1stExon	opensea
cg01588379	0.17591	0.281774	0.019438	0.019438	PRKAG2	Body	opensea
cg03900257	0.00547646	0.0200316	0.0194204	0.0194204	RAPGEF1	Body	opensea
cg05664175	0.00833978	0.0273815	-0.0194192	0.0194192	PDPK1	3'UTR	opensea
cg08410928	0.289852	0.409819	-0.0194168	0.0194168	PRKAA1	Body	opensea
cg09511813	0.0462775	0.101172	-0.0194034	0.0194034	RPTOR	Body	opensea
cg01781557	0.148024	0.246094	0.0194002	0.0194002	CALML4	Body	opensea
cg10471703	0.0242362	0.0619521	0.0193991	0.0193991	PDPK1	3'UTR	shelf
cg12478290	0.0018082	0.00861368	-0.0193767	0.0193767	CALM2	TSS200	island
cg02675920	0.0533904	0.112419	0.0193506	0.0193506	RPTOR	Body	opensea
cg13679814	0.00016967	0.00147901	-0.0193448	0.0193448	PYGL	TSS200	island
cg09707038	0.196275	0.304953	-0.0193402	0.0193402	CALM2	Body	opensea
cg06166785	0.261276	0.377956	-0.0193253	0.0193253	G6PC	Body	opensea
cg06402858	0.0960417	0.176888	-0.019317	0.019317	SHC3	Body	opensea
cg04886448	0.00796143	0.0263921	-0.0193057	0.0193057	FLOT2	Body	island
cg03641032	0.0353532	0.0827126	-0.0192994	0.0192994	RPTOR	Body	shelf
cg12434898	0.0690382	0.136619	-0.0192942	0.0192942	RPTOR	Body	shore
cg21523093	0.320634	0.443307	-0.0192917	0.0192917	FOXO1	Body	opensea
cg15512832	0.000264145	0.002043	-0.01929	0.01929	INPP5A	Body	island
cg08051977	2.50947e-07	1.47951e-05	0.0192818	0.0192818	FASN	Body	shore
cg26469982	0.0242644	0.0619952	0.0192668	0.0192668	RPTOR	Body	shore
cg12449716	0.00103935	0.00561059	0.0192452	0.0192452	INPP5A	Body	shore
cg04716580	2.52401e-05	0.000369044	0.0192279	0.0192279	INPP5A	Body	shelf
cg13010483	0.00096957	0.00536985	-0.0192155	0.0192155	PKLR	Body	opensea
cg20001572	0.486564	0.604314	-0.0192052	0.0192052	MTOR	Body	opensea
cg15476425	0.00837187	0.0274375	0.0192006	0.0192006	RPTOR	Body	opensea
cg12411159	0.0419304	0.0942993	-0.0191892	0.0191892	PIK3R1	Body	opensea
cg15999544	2.73045e-05	0.000388062	0.0191854	0.0191854	MAPK1	3'UTR	opensea
cg11870538	0.00342175	0.0140958	-0.0191844	0.0191844	MAPK8	TSS1500	shore
cg00143364	0.0106106	0.0328689	-0.0191722	0.0191722	RPTOR	Body	opensea
cg00135371	0.00403435	0.0157868	0.0191708	0.0191708	INPP5A	Body	opensea
cg02334669	2.75975e-06	7.60387e-05	-0.0191706	0.0191706	PRKCZ	Body	opensea
cg10268249	0.000109887	0.00106019	0.0191624	0.0191624	PRKAG2	5'UTR	opensea
cg08840018	1.58695e-06	5.2735e-05	0.0191166	0.0191166	SHC2	Body	island
cg14985030	0.000547745	0.00351262	0.0191143	0.0191143	TSC2	Body	shore
cg23423329	0.0551065	0.115192	-0.0190954	0.0190954	FLOT1	Body	shore
cg17733649	4.34343e-07	2.09065e-05	0.0190716	0.0190716	PRKAG2	Body	opensea
cg15358372	0.24335	0.358295	0.0190635	0.0190635	HK1	Body	opensea
cg27520597	0.19852	0.308092	-0.0190544	0.0190544	INSR	Body	opensea
cg01000422	0.032953	0.0782509	0.019036	0.019036	PHKB	Body	opensea
cg08370546	0.0101578	0.031917	0.0190315	0.0190315	PHKG1	TSS200	opensea
cg03140026	3.64856e-05	0.000486381	-0.0190284	0.0190284	RPTOR	TSS1500	shore
cg13358061	0.000230109	0.00184727	-0.0190112	0.0190112	ACACA	Body	opensea
cg12614898	9.24154e-05	0.000921298	0.0190101	0.0190101	CBLB	Body	opensea
cg09868003	0.00176221	0.00844598	-0.0189942	0.0189942	SHC4	Body	shelf
cg14397431	0.000364718	0.00259707	0.0189856	0.0189856	GYS1	Body	opensea
cg11229488	0.0543825	0.114026	-0.0189855	0.0189855	PRKAR1B	Body	opensea
cg22128985	0.000374781	0.00264741	-0.0189836	0.0189836	PRKCZ	Body	opensea
cg09564414	4.74284e-08	4.71313e-06	0.0189794	0.0189794	RAPGEF1	Body	opensea
cg23152216	0.0127283	0.0376426	-0.0189481	0.0189481	KRAS	TSS1500	opensea
cg02138098	0.148955	0.247316	-0.0189481	0.0189481	PRKCZ	5'UTR	shore
cg18025961	0.0898341	0.16857	-0.0189193	0.0189193	PRKCZ	Body	opensea
cg16541275	0.00354861	0.0144554	0.0188707	0.0188707	RPTOR	Body	shelf
cg21043558	0.0552786	0.1155	0.0188623	0.0188623	BRAF	TSS1500	shore
cg15216078	0.00158002	0.00779769	0.0188605	0.0188605	INPP5A	Body	shore
cg24602619	0.000355871	0.00254525	-0.0188518	0.0188518	MKNK1-AS1	Body	opensea
cg23931880	0.00953986	0.0303934	0.0188509	0.0188509	INPP5A	Body	shelf
cg25656007	0.0992778	0.181145	-0.0188476	0.0188476	TSC1	5'UTR	shore
cg16912637	0.000312334	0.00232852	-0.0188424	0.0188424	SREBF1	Body	opensea
cg17872658	0.0179784	0.0492384	0.0188299	0.0188299	RPTOR	Body	shore
cg13443631	0.245803	0.360937	0.0188274	0.0188274	HK2	Body	opensea
cg15755127	0.0178148	0.0488393	-0.0187971	0.0187971	RPTOR	Body	opensea
cg04520340	0.023489	0.0602668	0.0187913	0.0187913	PRKCZ	1stExon	shore
cg05681859	0.0532625	0.112279	0.0187797	0.0187797	FLOT1	Body	opensea
cg08109625	2.41286e-05	0.000361467	-0.0187711	0.0187711	PRKCZ	5'UTR	shore
cg02044989	0.00191212	0.00897617	-0.018762	0.018762	PYGB	TSS200	island
cg08659047	0.000354294	0.00254525	-0.018732	0.018732	PRKCZ	Body	shelf
cg15593382	0.00512698	0.0190456	-0.0187274	0.0187274	PRKACB	TSS200	opensea
cg09492541	0.044697	0.0984626	0.0187021	0.0187021	RPTOR	Body	opensea
cg17644932	0.0625777	0.127182	-0.0186889	0.0186889	GSK3B	Body	opensea
cg12365985	0.000672456	0.00410373	0.0186812	0.0186812	PIK3R3	Body	opensea
cg23635355	0.000274175	0.00209958	0.0186637	0.0186637	G6PC3	TSS200	island
cg11696861	1.81225e-05	0.000288854	-0.0186459	0.0186459	TRIP10	Body	island
cg10071739	0.0483723	0.104664	0.018608	0.018608	SH2B2	Body	shore
cg26628496	0.236617	0.350736	-0.0186041	0.0186041	PPP1R3B	Body	opensea
cg04310074	0.105001	0.189099	-0.0185888	0.0185888	MTOR	Body	opensea
cg08658750	0.297118	0.41817	-0.0185656	0.0185656	PPARGC1A	Body	opensea
cg00037940	0.00037412	0.00264684	0.0185335	0.0185335	PIK3CB	TSS1500	opensea
cg19961945	0.131761	0.224991	-0.0185235	0.0185235	INSR	Body	opensea
cg25006149	0.0811482	0.155023	-0.0185183	0.0185183	AKT3	Body	opensea
cg26789956	0.208375	0.318431	0.0185141	0.0185141	ACACA	Body	opensea
cg12173703	0.00536857	0.0197291	0.0184967	0.0184967	EIF4E	Body	opensea
cg12835599	0.00268589	0.0116879	-0.0184807	0.0184807	PRKAG2	Body	opensea
cg25507371	0.000168431	0.00147055	0.0184641	0.0184641	SOCS2	5'UTR	island
cg00500602	5.52199e-05	0.000638089	0.0184609	0.0184609	TSC2	Body	island
cg23413567	0.0405738	0.0920803	-0.0184546	0.0184546	FOXO1	Body	opensea
cg25651783	0.0093282	0.0298928	-0.0184535	0.0184535	PKLR	Body	island
cg16138677	0.425286	0.548282	0.0184289	0.0184289	PCK2	5'UTR	shore
cg10538214	0.0311863	0.0748954	0.0184211	0.0184211	RPTOR	Body	shelf
cg02346006	3.14065e-07	1.70497e-05	-0.0184005	0.0184005	RPTOR	Body	shore
cg10100767	0.00190525	0.00895159	0.0183902	0.0183902	AKT1	Body	opensea
cg09180820	0.0501375	0.107426	0.0183869	0.0183869	PRKCZ	Body	shelf
cg04863427	0.27125	0.388827	-0.0183825	0.0183825	PRKAG2	Body	opensea
cg20406576	0.00577604	0.0208767	-0.0183739	0.0183739	PRKAG2	Body	opensea
cg11329058	0.0459571	0.100592	-0.0183718	0.0183718	RPTOR	Body	opensea
cg05792022	1.77691e-06	5.66441e-05	-0.0183577	0.0183577	FOXO1	1stExon	island
cg01704823	0.00197781	0.00920573	0.0183379	0.0183379	INSR	3'UTR	opensea
cg17204289	0.268146	0.385386	0.0183372	0.0183372	PRKAG2	1stExon	opensea
cg26351605	0.22907	0.342605	0.0183348	0.0183348	SH2B2	Body	shelf
cg24702106	0.029364	0.0715423	0.0183266	0.0183266	PRKAG2	Body	opensea
cg07215025	0.00088749	0.00501144	-0.0183262	0.0183262	HKDC1	Body	opensea
cg26585407	0.185523	0.293278	0.0183224	0.0183224	AKT3	Body	opensea
cg10103955	6.7197e-06	0.000146207	-0.0183186	0.0183186	PRKAR1B	Body	shelf
cg06761641	0.00207506	0.00950508	0.0183099	0.0183099	HK1	5'UTR	opensea
cg00300046	0.0314446	0.0753214	0.0183036	0.0183036	PRKCZ	Body	shelf
cg22698177	0.231384	0.3455	-0.0182984	0.0182984	SHC4	Body	opensea
cg07285276	0.0854067	0.161924	-0.0182983	0.0182983	RAPGEF1	TSS200	opensea
cg12807696	0.00457807	0.0173954	0.0182861	0.0182861	MAPK3	Body	opensea
cg07737211	0.000789238	0.00462823	0.0182698	0.0182698	MAPK9	TSS1500	opensea
cg22104602	0.199845	0.309533	-0.018264	0.018264	PRKAR2A	Body	opensea
cg19267205	0.170636	0.274803	0.0182368	0.0182368	PIK3CD	Body	opensea
cg14127237	0.00387092	0.0153071	0.0182339	0.0182339	SREBF1	Body	shelf
cg05424199	0.000255092	0.00199241	-0.0182277	0.0182277	PHKG2	TSS200	island
cg06475431	0.202491	0.312356	-0.0182188	0.0182188	HRAS	5'UTR	shore
cg01804478	0.0305067	0.0736863	-0.0181849	0.0181849	ACACB	Body	opensea
cg02289754	0.0191807	0.0516288	0.0181597	0.0181597	MKNK1	Body	shore
cg00315816	0.00501161	0.0187184	-0.0181365	0.0181365	PRKAG2	5'UTR	opensea
cg18559785	0.00369248	0.0148103	0.0181341	0.0181341	LIPE	Body	shore
cg26287080	0.00213289	0.00971316	0.0181091	0.0181091	EXOC7	Body	opensea
cg20605413	0.188452	0.296674	0.0180987	0.0180987	PCK1	1stExon	opensea
cg06431459	0.148143	0.246217	0.018096	0.018096	SHC2	Body	shore
cg08482917	0.34394	0.467033	-0.018092	0.018092	PPP1R3B	5'UTR	shore
cg08804421	0.000736932	0.00440152	0.018087	0.018087	RPTOR	Body	island
cg24478001	0.00264442	0.0115717	-0.0180775	0.0180775	GRB2	5'UTR	opensea
cg00545580	0.166749	0.270418	-0.0180764	0.0180764	RPTOR	Body	opensea
cg15327496	0.0173698	0.0479741	-0.0180724	0.0180724	PRKCZ	5'UTR	opensea
cg25924746	0.0489236	0.105526	-0.0180648	0.0180648	IRS2	Body	shore
cg20400248	7.38743e-05	0.000784986	0.0180534	0.0180534	PPP1R3B	5'UTR	shelf
cg17559893	0.00427065	0.0164554	0.0180507	0.0180507	MKNK1-AS1	Body	opensea
cg24712354	0.0693606	0.137046	-0.0180394	0.0180394	LIPE	Body	shore
cg09251606	0.209024	0.319153	-0.0180363	0.0180363	RPTOR	Body	opensea
cg03173169	5.39541e-05	0.00062809	-0.018002	0.018002	HK2	5'UTR	island
cg00797152	0.0511016	0.108878	-0.0179734	0.0179734	CALML5	TSS200	shore
cg08315145	0.000214048	0.00174647	0.0179574	0.0179574	INPPL1	3'UTR	shore
cg22029985	4.00421e-05	0.000519033	-0.0179452	0.0179452	PTPRF	Body	opensea
cg05060486	0.0545046	0.114182	0.0179395	0.0179395	PRKAR1B	Body	island
cg08756247	0.0438947	0.0973604	0.017939	0.017939	TSC1	Body	opensea
cg20337860	0.0962819	0.177093	-0.0179332	0.0179332	TSC2	Body	island
cg21238376	0.00363827	0.0146466	-0.0179275	0.0179275	RPTOR	Body	shelf
cg20317738	0.000906208	0.00509614	-0.0179237	0.0179237	PIK3CD	5'UTR	island
cg08265392	0.356692	0.481118	0.0179102	0.0179102	PRKAG2	Body	opensea
cg02831294	0.038374	0.0881831	-0.0179064	0.0179064	CALML3	TSS200	shore
cg00542261	0.148809	0.247173	-0.0178841	0.0178841	HK1	Body	opensea
cg08763630	0.00054655	0.00350906	0.017881	0.017881	INPP5A	Body	opensea
cg18339493	0.0447603	0.0984849	-0.0178644	0.0178644	RPTOR	Body	opensea
cg26252027	0.0174503	0.0480804	-0.0178599	0.0178599	PRKCZ	Body	opensea
cg03122616	9.58295e-06	0.000191067	-0.0178548	0.0178548	PRKAR1B	Body	shore
cg09378756	0.396913	0.522014	0.017853	0.017853	PCK2	Body	opensea
cg15525052	0.0691957	0.136819	-0.0178524	0.0178524	RAPGEF1	Body	opensea
cg10583664	0.0268919	0.067144	0.017827	0.017827	INPP5A	3'UTR	island
cg15482928	4.34474e-05	0.00055144	0.0178064	0.0178064	PTPRF	Body	opensea
cg18989243	4.00917e-06	0.000100376	0.0177918	0.0177918	NRAS	TSS200	opensea
cg10679756	0.0214531	0.0561735	0.0177519	0.0177519	RHEB	Body	opensea
cg15579485	0.0631426	0.128084	0.0177332	0.0177332	RAPGEF1	Body	opensea
cg22645062	0.296085	0.417442	0.0177266	0.0177266	GYS1	Body	shore
cg22505241	0.106621	0.191171	-0.0177233	0.0177233	BRAF	Body	opensea
cg00481080	0.00666154	0.0231759	-0.0177204	0.0177204	RHEB	Body	opensea
cg16599817	0.0123493	0.0368396	-0.0177153	0.0177153	PRKCZ	1stExon	shelf
cg09856107	0.0851535	0.161556	-0.0177126	0.0177126	RAF1	5'UTR	shelf
cg12156960	0.111371	0.198053	0.0177114	0.0177114	PHKB	Body	opensea
cg04951638	0.270811	0.388402	0.0177072	0.0177072	RPTOR	Body	opensea
cg06906087	0.0391739	0.0895954	-0.0177012	0.0177012	FASN	Body	shore
cg11973514	3.49153e-05	0.000470371	-0.0176865	0.0176865	AKT3	Body	opensea
cg13274612	1.62801e-05	0.000271199	-0.0176787	0.0176787	PRKACA	Body	opensea
cg03634775	0.0745112	0.14508	0.0176675	0.0176675	PHKG2	TSS1500	shore
cg16822666	0.0018585	0.00879218	-0.0176649	0.0176649	ACACA	5'UTR	opensea
cg27170927	0.00737641	0.0249198	0.0176554	0.0176554	ACACA	Body	opensea
cg14211075	0.184621	0.292143	0.017651	0.017651	TSC1	5'UTR	shore
cg14009912	0.0185808	0.0504101	-0.0176379	0.0176379	SHC3	Body	opensea
cg14322961	0.0720615	0.141263	-0.0176363	0.0176363	SHC3	Body	shelf
cg20779363	0.00308526	0.0129927	0.0176339	0.0176339	PIK3CA	5'UTR	opensea
cg11702613	0.200411	0.310103	0.017626	0.017626	INPP5A	Body	opensea
cg18645647	2.22038e-06	6.54536e-05	-0.0176231	0.0176231	ACACB	Body	opensea
cg06942142	0.074337	0.144792	-0.0176087	0.0176087	CRKL	3'UTR	shelf
cg06801943	0.00210302	0.00960866	-0.0176067	0.0176067	PRKCZ	Body	opensea
cg22227910	0.102616	0.185813	0.0175894	0.0175894	PRKCI	Body	opensea
cg07805542	0.0143122	0.0411935	0.0175888	0.0175888	PIK3CD	Body	shelf
cg07824789	0.0209137	0.0554497	0.0175852	0.0175852	PRKCI	Body	shore
cg24138964	0.019098	0.0514567	-0.0175828	0.0175828	PRKCZ	Body	island
cg15216636	0.00964328	0.0306232	-0.0175527	0.0175527	TRIP10	Body	island
cg10327009	0.214613	0.326143	-0.0175439	0.0175439	G6PC	3'UTR	opensea
cg09570413	0.0071297	0.0243716	0.0175347	0.0175347	AKT3	Body	opensea
cg05601215	0.00431674	0.0165863	-0.0175315	0.0175315	AKT3	Body	opensea
[truncated: 3,484 more rows]

## Sheet: S2. Enrichment Table
Gene	# of significant probes	# of sites in analysis for given gene	Proportion of total probes analyzed within gene	Direction of Methylation Change (↑=increased methylation in olanzapine group)	Gene	# of significant probes	# of sites in analysis for given gene	Proportion of total probes analyzed within gene	Direction of Methylation Change (↑=increased methylation in olanzapine group)
RPS6KB1	1	6	16.6667	↑	KRAS	1	27	3.7037	↓
PPP1R3A	1	7	14.2857	↓	PPARGC1A	1	27	3.7037	↓
MAPK8	3	27	11.1111	All ↑	BRAF	1	28	3.57143	↑
SREBF1	5	46	10.8696	1↑ 4↓	PYGL	1	28	3.57143	↑
IRS1	4	37	10.8108	All ↓	PRKCI	1	31	3.22581	↑
PHKG1	1	11	9.09091	↓	PRKACA	1	33	3.0303	↓
RHEB	3	35	8.57143	2↑ 1↓	PRKAG2	6	226	2.65487	5↑ 1↓
PYGM	2	27	7.40741	1↑ 1↓	RAF1	1	38	2.63158	↑
CALML6	1	14	7.14286	↓	CBLB	1	42	2.38095	↓
PRKAR2A	1	14	7.14286	↓	PHKB	1	43	2.32558	↓
MAPK10	4	57	7.01754	2↑ 2↓	PRKAR1B	5	220	2.27273	All ↑
MKNK1	2	32	6.25	All ↑	PTPRF	2	88	2.27273	All ↑
PKLR	1	16	6.25	↓	SHC2	1	44	2.27273	↓
HK1	4	67	5.97015	3↑ 1↓	FOXO1	1	49	2.04082	↑
CALM3	1	19	5.26316	↑	PRKCZ	5	260	1.92308	2↑ 3↓
CBL	1	20	5	↓	RPTOR	9	476	1.89076	All ↑
GCK	2	42	4.7619	1↑ 1↓	SORBS1	2	109	1.83486	All ↓
PTPN1	2	44	4.54545	1↑ 1↓	AKT2	1	60	1.66667	↑
CRK	1	22	4.54545	↓	GRB2	1	63	1.5873	↓
SLC2A4	1	23	4.34783	↑	FLOT1	1	66	1.51515	↑
PDE3B	1	24	4.16667	↑	INSR	1	67	1.49254	↓
PPP1R3E	1	25	4	↑	ACACA	1	78	1.28205	↓
EIF4E1B	1	26	3.84615	↑	RAPGEF1	1	94	1.06383	↓
PPP1CC	1	26	3.84615	↓	TSC2	1	96	1.04167	↑
PIK3R1	2	54	3.7037	All ↓	INPP5A	2	347	0.576369	1↑ 1↓
EIF4E	1	27	3.7037	↑
